1 Octopus arm movements under constrained conditions. Adaptation, modification and  
2 plasticity of motor primitives

3

4 Richter JN<sup>1\*</sup>, Hochner B<sup>1</sup>, and Kuba MJ<sup>1, 2\*</sup>

5

6

7 <sup>1</sup> Department of Neurobiology, Alexander Silberman Institute of Life Sciences,  
8 Hebrew University, Jerusalem

9 <sup>2</sup> Department of Neural Systems and Coding, Max Planck Institute for Brain  
10 Research, Frankfurt

11

12

13 Corresponding Authors: [Michael.Kuba@brain.mpg.de](mailto:Michael.Kuba@brain.mpg.de)

14 [J.N.Richter@gmx.net](mailto:J.N.Richter@gmx.net)

15 Keywords: octopus, reaching, fetching, motor control, motor primitives

## 16 ABSTRACT

17

18           The motor control of the eight highly flexible arms of the common octopus  
19 (*Octopus vulgaris*) has been the focus of several recent studies. Our study is the first  
20 to manage to introduce a physical constraint to an octopus arm and investigate the  
21 adaptability of stereotypical bend propagation in reaching movements and the pseudo-  
22 limb articulation during fetching. Subjects (n=6) were placed inside a transparent  
23 Perspex box with a hole at the center that allowed the insertion a single arm. Animals  
24 had to reach out through the hole toward a target, to retrieve a food reward and fetch  
25 it. All subjects successfully adjusted their movements to the constraint without an  
26 adaptation phase. During reaching tasks the animals showed two movement  
27 strategies: stereotypical bend propagation reachings, which were established at the  
28 hole of the Perspex box and variant waving-like movements that showed no bend  
29 propagations. During fetching movements, no complete pseudo-joint fetching was  
30 observed outside the box and subjects pulled their arms through the hole in a pull-in  
31 like movement. Our findings show that there is some flexibility in the octopus motor  
32 system to adapt to a novel situation. However, at the present it seems that these  
33 changes are more an effect of random choices between different alternative motor  
34 programs, without showing clear learning effects in the choosing between the  
35 alternatives. Interestingly animals showed the ability to either adapt the fetching  
36 movements to the physical constraint, or as alternative explanation, to switch the  
37 motor primitive fetching to a different motor primitive “arm pulling”.

38

## 39 INTRODUCTION

40

41           Octopuses represent an interesting model for the research of motor control in a  
42 soft-bodied animal due to their eight highly flexible arms and centralized nervous  
43 system. Recently octopuses have been a model for developing bio-inspired robots  
44 with highly flexible continuum appendages (Zheng et al., 2013; Pfeifer et al., 2014).

45           The lack of any skeletal structure (Feinstein et al., 2011) enables the animals  
46 to move their arms in any direction, they can bend, twist, elongate and shorten and

47 use virtually infinite degrees of freedom (DOF) (Kier and Smith, 1985). To reduce the  
48 complexity of arm control, the octopus uses motor primitives to perform stereotypical  
49 motor patterns. Motor primitives are loosely defined as the building blocks of a  
50 complex motion (Flash and Hochner, 2005), like an alphabet of elementary actions  
51 (Del Vecchio et al., 2003). Although the motor primitives themselves are considered  
52 invariant, they can be recombined dynamically to form complex movements (Moro et  
53 al., 2012).

54 Two discrete, stereotypical movements have been described in the octopus:  
55 *bend propagation reaching* and *pseudo-joint fetching*. During reaching toward a  
56 target, a bend propagates in a wave-like manner from the base of the arm toward the  
57 tip (Gutfreund et al., 1996). During these arm extension movements, motor neurons of  
58 the nerve cord activate the muscles in a wave-like manner and propagate the bend  
59 (Gutfreund et al., 1996; Gutfreund et al., 1998). This stereotypical movement can also  
60 be elicited by stimulation of the nerve cord in an *in vitro* preparation, which  
61 demonstrates that the respective motor program is embedded in the arm of the octopus  
62 (Sumbre et al., 2001).

63 To fetch an object to their mouth, animals form quasi-articulated limbs based  
64 on three dynamic joints (Sumbre et al., 2005). Here, two waves of muscle activation  
65 travel toward each other and set a pseudo-joint location at their point of collision  
66 (Sumbre et al., 2006). This emulates the situation in vertebrate arms with stiffened  
67 joints and enables the octopus to use precise point-to-point movements. Both reaching  
68 and fetching, are highly stereotypical and greatly reduce the number of DOFs and  
69 therefore the complexity of movement control.

70 One of the most important questions is about the limitations of the octopuses  
71 motor control system. To generate goal directed movements, both robustness and  
72 adaptivity are equally important. Strict feed-forward motor programs are a trade-off  
73 between reduction of complexity and flexibility. This trade-off could be compensated  
74 by higher-order motor centers, but little is known about such adaptations in the  
75 control system of the octopus.

76 The basal lobes, which are the higher motor centers in the octopus (Young,  
77 1971; Wells, 1978), consist of about 2.5 million cells, but seem to lack somatotopical  
78 organization at this level (Zullo et al., 2009), which suggests reduced interconnections

79 of sensory and motor neurons. The large number of neurons in axial nerve cords of  
80 the arms on the other hand, may point toward an alternative control center for high  
81 level information processing: The peripheral nervous system contains about 350  
82 million cells, comprising about two thirds of all neurons in the octopus. Most of the  
83 cells are located in axial nerve cords projecting from the brain to the arms  
84 (Budelmann et al., 1995). While a special division of labor between the central  
85 nervous system and the peripheral nervous system of the arms has been demonstrated  
86 before (Altman, 1971; Wells, 1978; Sumbre et al., 2001; Sumbre et al., 2005), lesion-  
87 studies suggest that at least in goal directed movements higher brain areas are  
88 necessary to control planning and execution of the motion, for example during  
89 fetching motions (Sumbre et al., 2006).

90 It is unknown to what extend reaching and fetching movements can be  
91 controlled to overcome a physical constraint. To investigate the flexibility and  
92 adaptability of the motor control system, we introduced a physical constraint to the  
93 arm and studied how it affects the previously described behaviors *bend propagation*  
94 *reaching* and *pseudo-joint fetching*. The limitation to the onset of the motor primitives  
95 forced the animals to adapt to the new situation. Animals were able to adapt to the  
96 constraint by dynamically generating feed-forward bend propagation reachings and  
97 stereotypical pull-in fetchings. These results show that octopuses have a flexible and  
98 dynamic motor control system, which adapts instantly to new situations.

99

## 100 RESULTS

101

102 Six octopuses were put into a Perspex box and were required to reach toward a  
103 target and fetch the food reward by inserting their arm through a hole in the box. All  
104 animals were able to adapt to the physical constraint and used distinct strategies  
105 during the reaching (Figure 1A) and fetching tasks (Figure 1B). Overall, 286  
106 successful reaching movements and 382 fetching movements were observed.

### 107 Reaching

108 During reaching tasks octopuses used motions that were classified into two  
109 strategies, a straight point-to-point reaching (please see supplemental movie clip

110 “Reaching.mov”) and a seemingly undirected movement we termed waving-like  
111 (please see supplemental movie clip “Waving.mov”). Straight reachings (n=148) are  
112 linear point-to-point and goal directed bend propagation reachings as first described  
113 by (Gutfreund et al., 1996), complemented by elongation of the arm. The octopus  
114 positions the midsection of an arm over the hole of the Perspex wall and forms a loop  
115 outside of the box (Figure 1 Aseconds 0.3 – 1). This loop initiates the new bend,  
116 which will then travel toward the tip of the arm (see Figure 1A, seconds 1.4 – 2.4).  
117 Next to loop-induced bend propagation movements, bend propagations were set up  
118 freely outside the box in about 7% of all successful reachings. In these cases the arm  
119 was put through the hole in a different manner (e.g. by stretching and pushing the tip  
120 of the arm through the hole) and a bend was established outside the box without the  
121 loop-building procedure at the hole.

122

123 In order to compare straight reaching motions in constrained situations to  
124 unconstrained motions described by Gutfreund et al. (1996), the same analyzing and  
125 normalization methods were used on ten random reaching movements, which  
126 successfully hit the target. The normalized tangential velocity profiles of constrained  
127 reaching movements showed typical invariant bell-shaped curves (Figure 2B) with  
128 three corresponding phases, identical to reaching movements in an unconstrained  
129 situation (Figure 2A). Phase I corresponds to the establishment of the bend and is the  
130 most variable part of the movement. Phase II, the propagation of the bend along the  
131 arm, corresponds to the steep velocity increase in the profile and is the most robust  
132 part of the movement. The maximum and subsequent decrease of velocity in phase III  
133 corresponds to a passive part of the movement in the vicinity of the object.

134 Waving-like movements (n=138) are seemingly undirected, explorative  
135 movements outside the box with no bend propagation and random kinematic profiles  
136 (Figure 3). In most cases the arm is put through the hole by using the loop-building  
137 procedure similar to movements in the straight category.

138 The reaching strategies differed significantly in the duration until the object  
139 was touched (Mann-Whitney  $U= 312$ ,  $N= 272$ ,  $p< 0.001$ , Figure 4), in which mean  
140 duration for straight bend propagation reachings was short ( $2.4 \pm 1.3$  sec) and longer  
141 for waving-like motions ( $12.4 \pm 7.1$  sec). While waving-like behavior was observed

142 more often than straight bend propagation reaching on average ( $N = 130 \pm 109$  and 29  
143  $\pm 19$ ), the success rate was higher for straight reachings ( $87\% \pm 11.4$ ) than for waving-  
144 like motions ( $27.7\% \pm 29.8$ ).

145           Since straight reachings were more successful, learning in the octopuses might  
146 mean a transfer of their strategy from a more undirected and waving-like movement  
147 to an efficient point-to-point reaching. To test if a shift in reaching strategies  
148 happened over time, strategy choices were compared between the beginning and the  
149 end of the experiments. Successful reaching motions were split into three trial bins  
150 for each animal and then compared between first and last bin (Figure 5). Two of six  
151 animals significantly changed the strategy in the last third of the experiment  
152 compared to the first; in the last third of the experiment Animal 5 increased the  
153 amount of waving-like motions ( $\chi^2(1) = 6.65$ ,  $N = 30$ ,  $p = 0.01$ ) and Animal 3 increased  
154 the amount of straight reachings ( $\chi^2(1) = 7.84$ ,  $N = 74$ ,  $p = 0.005$ ). The relative number  
155 of fails did not change over the course of the experiment ( $\chi^2(1) = 3.043$ ,  $N = 634$ ,  $p =$   
156  $0.081$ ).

157

## 158 Fetching

159           All animals were able to pull the food reward through the hole in the Perspex  
160 wall and only a few trials were marked as fails (food dropped  $n = 24$ , general  
161 execution error  $n = 5$ ). To test for differences in movement patterns, all movements  
162 were subjectively categorized into two categories, straight (please see supplemental  
163 movie clip “Fetching.mov”) or deflected (please see supplemental movie clip  
164 “Deflected.mov”) movements. Movements that showed a general immediacy and an  
165 overall straight and point-to-point shape were classified as straight movements and  
166 movements that could not clearly be classified as straight movements formed the  
167 deflected group. To differentiate the two categories in order to test if these  
168 movements are discrete, a sample of 60 successful fetching trials (ten per animal)  
169 were tested for general reliability of the classification into categories. First, the  
170 movements were reevaluated by subjective categorization of a second observer and  
171 then by a categorization based on 3D reconstruction of the movements’ trajectories  
172 and their tangential velocity profiles.

173 To test for inter-rater reliability of the subjective categorization,  
174 Krippendorff's  $\alpha$  (Hayes and Krippendorff, 2007) was calculated for two observers.  
175 The classification was accepted with an agreement of  $\alpha= 0.67$  (95% CI, 0.443 to  
176 0.851). The relatively vague criteria for classification justified the use of the  
177 minimum recommended  $\alpha$ -values (Hayes and Krippendorff, 2007).

178 Movements with generally straight trajectories were categorized as straight  
179 (Figure 6A), as well as normalized tangential velocity profiles that showed stereotypic  
180 bell shaped curves (Figure 6B). Trajectories and tangential velocity profiles that were  
181 random and not stereotypical were categorized as deflected (Figure 6C and 6D). The  
182 three ratings per movement, based on subjective categorization, tangential velocity  
183 profiles and trajectories were tested for compliance and showed a general consent on  
184 their respective categorization (Krippendorff  $\alpha = 0.71$ ). Overall 281 trials were  
185 categorized as straight and 100 as deflected.

186

187 Mean fetching times also differed significantly between categories (Mann-  
188 Whitney  $U= 21.5$ ,  $N= 381$   $p< 0.001$ ), with a mean duration of  $2.7 \pm 1.66$  sec for the  
189 straight category and  $5.81 \pm 4.82$  sec for the deflected category.

190 The distribution of the strategies during the first ten trials was not  
191 homogenous among the animals (Table 1). Four of the six animals showed straight  
192 fetching in the first trial and the general distribution of strategies was found to be  
193 random (One-sample Runs test, not significant; see Table 1).

194 To test if the animals changed their fetching strategies in the course of the  
195 entire experiment due to an adaptation to the constraint, all trials were divided into  
196 three trial bins for each animal and the respective movement categories were analyzed  
197 (Figure 7). The relative number of straight and deflected fetches did not change  
198 significantly from the first to the last third of the experiment ( $\chi^2(1)= 1.748$ ,  $N= 254$   
199  $p= 0.1869$ ). Also the combined fetching time of all animals showed no significant  
200 improvement ( $U= 8752$ ,  $N= 253$   $p= 0.191$ ), however, two individual animals  
201 significantly changed their mean fetching time in the course of the experiment:  
202 Animal 2 lowered the mean fetching time from  $7.24 \pm 5.5$  sec in the first third to  $3.85$   
203  $\pm 3.5$  sec in the last third of the experiment ( $U= 69.5$ ,  $N= 34$ ,  $p= 0.009$ ) but Animal 5

204 raised it from  $1.71 \pm 0.75$  sec to  $2.45 \pm 1.1$  sec ( $U= 1015$ ,  $N= 75$ ,  $p= 0.001$ ). The two  
205 opposed changes in reaching time point toward individual, rather than general effects.

206

## 207 DISCUSSION

208

209 A very promising perspective to explain movement generation and to  
210 overcome the *motor equivalence problem* of increasing complexity with increasing  
211 DOF's (Bernstein, 1967) is the modular approach. Movements result from the  
212 combination of a finite set of stable motor primitives (Bizzi et al., 2008) or a  
213 stereotypical co-activation of several muscles, called muscle synergies (d'Avella et  
214 al., 2003). Several studies showed the use of robust motor primitives during reaching  
215 (Gutfreund et al., 1996) and fetching movements (Sumbre et al., 2005) of unrestrained  
216 octopuses. However, there are no studies on the plasticity of movements and  
217 adaptivity of movement control. Our study is the first to manage to introduce a  
218 physical constraint to the octopus arm. This enabled us to gain new insights into the  
219 ability of the motor system to adapt and modify the motor primitives *bend-*  
220 *propagation reaching* and *pseudo-joint fetching*.

### 221 Adaptation to constrains

222 All animals adapted to the physical constraint and were able to reach and fetch  
223 through the hole in the Perspex wall. The animals showed flexibility in movement  
224 control by adapting to the constraint and using an appropriate movement to get to the  
225 food reward. In order to elucidate learning effects, movements of the reaching and  
226 fetching tasks were categorized into variant and invariant movements. Invariant  
227 movements had stereotypical kinematic profiles with straight trajectories and bell  
228 shaped tangential velocity profiles. Variant movements were described as waving-like  
229 reaching and deflected fetching and had no stereotypical trajectories, variable  
230 tangential velocity profiles and were longer in duration.

231 As there is no significant change in the amount of these movements over the  
232 course of the experiments, we assume that these movements are not transitional states  
233 during an adaptation period (Arce et al., 2009). Only one animal changed its behavior  
234 toward the more efficient straight reaching strategy, despite the higher success



235 probability. Likewise, during fetching tasks animals did not entirely change to the  
236 faster pull-in movements. Interestingly, the relative number of fails, which  
237 presumably represented explorative movements without coincidental target hits, did  
238 not change over the course of the experiment per animal as well, which overall  
239 suggests an absence of learning effects (Sosnik et al., 2004) or an insufficient  
240 motivational state of the animal to trigger learning effects. The general absence of any  
241 clear learning effect in terms of improvement in performance or in terms of time  
242 taken to complete a task eludes toward an absence of the ability of *octopus vulgaris* to  
243 shape motor programs due to learning. Since these behaviors must then be innate, the  
244 variance in the strategies suggests that the animals switch between different  
245 movement strategies during the same condition. In general, the waving-like reaching  
246 and the variances in the fetching patterns showed that the octopus' movement  
247 repertoire is probably not limited to a fixed set of movements. At least in the waving-  
248 like movements the high number of observations ( $N = 130 \pm 109$ ) and low success rate  
249 (about 25%) compared to straight reachings ( $N = 29 \pm 19$ , about 85% success rate)  
250 might explain the movement as an explorative movement, in which the animal  
251 touched the target by accident.

## 252 **Stereotypical movements**

253 Movements of the reaching and fetchings tasks were categorized according to  
254 their kinematic profiles or movement patterns. Stereotypical movements were  
255 generally immediate and goal directed movements with straight trajectories.

256 During reaching tasks the animals used propagating bends that were either  
257 initiated by building up loops through the hole of the wall using approximately the  
258 midsection of the arm, or were freely initiated outside the box. These bend  
259 propagation movements showed linear trajectories and stereotypical invariant  
260 normalized tangential velocity profiles and were identical to movements in freely  
261 behaving animals (Gutfreund et al., 1996). The dynamic range of control over this  
262 robust feed-forward motor program has not been shown before in octopus: The  
263 animals were able to sequentially connect the motor primitive bend propagation  
264 reaching and the loop building at the hole of the wall or could even be initiated  
265 outside the box. Since loop building at the hole was also observed in most movements  
266 of the waving category, it should be seen as an independent movement from the bend  
267 propagation initiation. Our findings suggest the ability of the octopus to start the

268 motor primitive at any point along the arm and to subsequently hit the target. This is  
269 an important finding as it stands in contrast with previous hypothesis that the  
270 directional control of the reaching movement is determined by adjusting two DOF's  
271 (yaw and pitch) at the base of the arm (Gutfreund et al., 1996).

272 Fetching movements categorized as straight consisted of a single linear  
273 motion. They were done with straight point-to-point pull-ins of the arms, with straight  
274 trajectories and bell shaped normalized tangential velocity profiles. These movements  
275 differ from fetching movements in freely behaving animals, as in our experiments no  
276 formation of stereotypical pseudo joints and quasi-articulated limbs could be  
277 observed. Interestingly, the kinematic profiles of straight fetching movements were  
278 very similar to the stereotypical bend propagation reaching movements in freely  
279 behaving animals, suggesting that these fetching movements are complete and  
280 uninterrupted movements. This suggests that this is either a modification of the  
281 existing motor primitive or an so far unknown new motor primitive – arm pulling.

282 Visual examination of all fetching movements showed a commonality  
283 between the two categories during fetching: In all trials the gripping shape of the arms  
284 seemed to be preserved and showed an S-shape, formed by the attachment of the food  
285 and an immediate second bend (see arrows in  
286 **Figure 1B**, 0.8 s). This has been described before (Sumbre et al., 2005; Sumbre et al.,  
287 2006) as “grasp of food item” and “distal joint”. It is unclear, however, if the grasping  
288 of the food item triggered pseudo-joint fetching, initiating for example the onset of  
289 medial and proximal joints, which might then have been masked or cancelled by a  
290 conflicting feedback signal triggered by the constrain on the arm. To clarify this  
291 possibility a further kinematic analysis would be required.

292 The neuromuscular control of the movement generation is unclear. It was  
293 hypothesized before, that the grip of the food item triggers two waves, which form  
294 pseudo-joints at the point of collision, creating dynamic joints along the arm with  
295 fixed ratios of inter-segment lengths (Sumbre et al., 2006). Although it is unclear if  
296 these joints were masked or cancelled by higher-order control mechanisms in the  
297 constraint situation, they did not interfere with the immediate switch to a straight pull-  
298 in movement in some animals (see Table 1). Unfortunately the proximal part and the  
299 base of the arm inside the box were not visible enough for a meaningful analysis of

300 the pull-in mechanism. The food items might have triggered the onset of a medial and  
301 proximal bend at the very proximal part of the arm inside the box, which then were  
302 dynamically altered by sensory information in terms of the length and stiffness of the  
303 quasi-articulated structures.

304

#### 305 Variant movements

306 Movements of each of the two stereotypical categories share similar motion  
307 patterns and seem goal directed because of the stereotypical kinematic profiles.  
308 However, the mechanisms underlying the movements in the variant category are  
309 unclear. The variant movements of the reaching tasks, categorized as waving-like  
310 movements, seemed to be fundamentally different from stereotypical bend  
311 propagation movements. Waving-like movements had random kinematic profiles and  
312 were seemingly undirected and the successful reaching to the target were lower than  
313 the direct reaching thus less rewarding. The movement patterns of variant fetching  
314 movements on the other hand differed only marginally from stereotypic point-to-point  
315 fetching movements, although differences in the kinematic profiles and duration were  
316 observed. The trajectories seemed to be random deviations from linear trajectories  
317 and were thus labeled as deflected categories. A commonality of all fetching  
318 movements seemed to be a pull-in motion pattern, controlled by the proximal segment  
319 of the arm and by shortening the arm. In contrast to reaching movements the reward  
320 gained by the two types of pulling were similar.

321 Point-to-point pull-in fetchings with their stereotypical kinematic profiles, that  
322 is, linear trajectories and the bell shaped normalized tangential velocity profiles, could  
323 present another motor primitive, for situations, where an arm is pulled through a tight  
324 opening. It is reasonable to assume that the pull-in movement itself was controlled by  
325 more proximal parts of the arm, which were inside the box and unfortunately not  
326 visible enough for a meaningful analysis. A common mechanism for pull-in fetchings  
327 could explain why the movement showed both, robust and variant forms and still  
328 seemed to have the same motion mechanics: While the proximal part of the arm  
329 controls the pull-in, the distal part is passive. Movement speed or immediacy of the  
330 pull-in changes the kinematic profile of the tip of the arm, which was the reference  
331 point during the kinematic analysis (see methods section). The animal would then be  
332 able to switch between activating a pull-in motor primitive and active control of the

333 distal part of the arm. This switch between robust motor primitives and flexible  
334 movements would be similar in principal to the dynamic linking of movement  
335 patterns during reaching movements in the constrained situation.

### 336 Sensory feed-back

337 It has been discussed previously if octopuses are able to use sensory feedback  
338 to control their movements (Wells, 1978; Gutfreund et al., 2006) and Gutnick et al.  
339 (2011) presented evidence that animals use visual feedback from their arms during  
340 three-choice-maze experiments. In our findings tactile sensors might collect  
341 additional information on the arm. The restriction due to the hole should provide  
342 sensory information to recognize the restricted mobility of the arm and thus this  
343 information is used to generate appropriate movements to overcome the constraint.  
344 The lack of systematic change in strategy choices between the variant and  
345 stereotypical form of the respective movement implies that no trial-and-error learning  
346 phase occurred in the course of the experiment. In the fetching task most animals  
347 used point-to-point pull-in motions without an adaptation phase. In the reaching task  
348 the animals initiated the loop of the bend propagation at the hole, which suggests that  
349 they used sensory feedback to identify the dimension of the obstacle and the point at  
350 which the initiation of the feed-forward motor program *bend propagation reaching*  
351 was possible.

352 Since feedback-controlled movements are generally considered to be too slow  
353 for fast online correction (Kawato, 1999), we propose that the octopus uses sensory  
354 feedback to gather information about its environment and incorporate them in its  
355 feed-forward inverse model to compute adequate actions and trajectories. While no  
356 change in categories over the course of the experiment was recorded, which could  
357 have been an indication for trial-and-error learning, all animals explored the box and  
358 its opening extensively during the experiments.

359

### 360 Résumé

361 The results of this study suggest that the octopus higher motor control system  
362 is flexible and adapts to novel situations mainly by choosing between two different  
363 movements that solve the task albeit with different rewarding rates. Interestingly,  
364 despite the difference in reward rate in the reaching movement no learning was

365 demonstrated. This suggests that the reward does not affect the decision between the  
366 two type of reaching (the waving and direct). An intriguing finding that requires  
367 further investigation, is the demonstrated the ability of the octopus to direct its arm to  
368 the target even though the movement starts from the hole rather than for the base of  
369 the arm. This proposes that the octopus uses sensory feedback to gather information  
370 about its environment and incorporate them in its feed-forward inverse model to  
371 compute adequate actions and trajectories. With respect to fetching it seems that the  
372 octopus has two alternative behaviors to solve the task (direct and indirect pulling). In  
373 this task there also seems to be a fixed decision ratio that also does not change over  
374 time (but here the reward is equal for the two movements).

375

376

## 377 MATERIALS AND METHODS

378

### 379 Subjects and holding

380 Subjects were six wild-caught *Octopus vulgaris* (Lamarck, 1798) (2 females, 4  
381 males; between 250-450g bodyweight) collected by fishermen from the Israeli coast  
382 of the Mediterranean Sea. The animals were housed individually in 100 liter artificial  
383 sea water tanks within a closed circulation system and held according to the  
384 guidelines for the EU Directive 2010/63/EU for cephalopod welfare (Fiorito et al.,  
385 2014). Tanks were enriched with clay-pot dens, gravel, rocks and green algae  
386 (*Caulerpa prolifera*), temperature of the holding rooms was held constant at about  
387 19°C. Day and night cycles were simulated by artificial illumination for 12 hours.  
388 Animals were fed every other day with either dead shrimps or pieces of fish.

389 All animals acclimatized for at least 14 days in the holding tanks before they  
390 were transferred to an experiment tank (400 liter), where they acclimatized for  
391 another day before experiments started. Animals were preselected for motivation and  
392 general health.

### 393 Experiments

394 Each animal was placed separately inside a custom made transparent Perspex  
395 box (40×40×40 cm) with a hole (1.5 cm in diameter) at the center of one side that

396 allowed the insertion of only a single arm. The animal had to reach out through the  
 397 hole to retrieve a food reward and pull it back in. Success criterion for the reaching  
 398 task was the touching of a target (white Perspex disc on a transparent Perspex stick).  
 399 A piece of shrimp was placed on the tip of the arm, which had to be completely pulled  
 400 through the hole for a successful fetching task. The reaching task onset was marked  
 401 by the insertion of the target into the water. Fetching tasks followed successful  
 402 reaching tasks or were initiated by letting the animal grip the target and then being  
 403 pulled to stretch the arm to average fetching distance. The target was presented  
 404 approximately at the level of the hole and the distance varied between 2-40 cm to  
 405 motivate the animals to reach for it.

#### 406 Kinematic Analysis

407 The experiment was constructed according to the publication by Gutfreund et  
 408 al. (1996). The sessions were recorded with two digital video cameras (SONY  
 409 Handycam HDR-XR550; Tokyo, Japan) in an angle of about 90 degrees and later  
 410 formatted, cut and transformed into picture sequences (25 frames per second) with  
 411 video editing software (Adobe Premiere CS5; San Jose, California, USA).

412 For the 3D reconstruction of trajectories and tangential velocity profiles, the  
 413 visual information of the two cameras was transformed to 3D coordinates, applying  
 414 the direct linear transformation (DLT) method (Wood and Marshall, 1986; Woltring  
 415 and Huiskes, 1990). A calibration body was used to obtain 11 parameters that were  
 416 used to define the image coordinates of the two cameras in the following DLT  
 417 equations:

$$418 \quad x_1 = \frac{P_1 X + P_2 Y + P_3 Z + P_4}{P_9 X + P_{10} Y + P_{11} Z + 1} \quad (1),$$

$$419 \quad y_1 = \frac{P_5 X + P_6 Y + P_7 Z + P_8}{P_9 X + P_{10} Y + P_{11} Z + 1} \quad (2),$$

420 with  $x_1$  and  $y_1$  as image coordinates of a designated point of camera 1 and the  
 421 unknown 3D coordinates  $X$ ,  $Y$  and  $Z$ . The variables  $P_{1-11}$  represent the 11 parameters  
 422 obtained from defined points of the calibration body.

423 Three points of interest were then marked in the image sequences using  
 424 MATLAB (MathWorks; Natick, Massachusetts, USA.) to reconstruct arm movement:  
 425 two reference points and either the bend or tip of the arm during reaching tasks or the

426 food item, which was typically put on the distal quartile of the arm, during fetching  
427 tasks. This positional data was then used to calculate the tangential velocity profile.  
428 The data was smoothed by fitting a fifth order polynomial to the projections of the  
429 points on the three axes as a function of time. The coefficients were obtained by  
430 calculating the least-square equation, using the singular value decomposition  
431 algorithm. Then  $V_{tan}$  was calculated from the derivatives of the smoothed coordinates  
432  $X(t)$ ,  $Y(t)$  and  $Z(t)$  with:

$$433 \quad V_{tan} = \sqrt{\left(\frac{dX}{dt}\right)^2 + \left(\frac{dY}{dt}\right)^2 + \left(\frac{dZ}{dt}\right)^2} \quad (3),$$

434 To account for invariances, the tangential velocity  $[V(t)]$  and time  $(t)$  were normalized  
435 according to the maximum velocity ( $V_{max}$ ) and travel distance ( $D$ ), following  
436 procedure after Atkeson and Hollerbach (1985) and Gutfreund et al. (1996):

$$437 \quad V_{normalized} = \frac{V(t)}{V_{max}} \quad (4),$$

$$438 \quad T_{normalized} = \frac{V_{max} \times t}{D} \quad (5),$$

$$439 \quad D = \sum_t \sqrt{(X_t - X_{t-1})^2 + (Z_t - Z_{t-1})^2} \quad (6),$$

440 with the smoothed coordinates  $X$  and  $Z$  and the index  $t$  as image number or time.

441 Further data analysis was done with SPSS 19 (IBM Software; Armonk, New  
442 York, USA) and Microsoft Excel 2011 for Mac OS (Redmond, Washington, USA). A  
443 inter-rater reliability test was done in order to calculate rating similarities between  
444 two independent observers. For this purpose two observers categorized the same trials  
445 according to the categorization rules and differences were calculated according to  
446 Hayes and Krippendorff (2007).

447

## 448 REFERENCES

449

- 450 **Altman, J. S.** (1971). Control of accept and reject reflexes in the octopus. *Nature*  
451 **229**, 204-206.  
452 **Arce, F., Novick, I., Shahar, M., Link, Y., Ghez, C. and Vaadia, E.** (2009).  
453 Differences in context and feedback result in different trajectories and adaptation  
454 strategies in reaching. *PloS one* **4**, e4214.

- 455 **Atkeson, C. G. and Hollerbach, J. M.** (1985). Kinematic features of unrestrained  
456 vertical arm movements. *The Journal of neuroscience : the official journal of the*  
457 *Society for Neuroscience* **5**, 2318-2330.
- 458 **Bernstein, N. A.** (1967). The co-ordination and regulation of movements. Oxford:  
459 Pergamon Press.
- 460 **Bizzi, E., Cheung, V. C., d'Avella, A., Saltiel, P. and Tresch, M.** (2008).  
461 Combining modules for movement. *Brain research reviews* **57**, 125-133.
- 462 **Budelmann, B. U., Bullock, T. H. and Williamson, R.** (1995). Cephalopod  
463 Neurobiology: Cephalopod brains: promising preparations for brain physiology:  
464 Oxford University Press.
- 465 **d'Avella, A., Saltiel, P. and Bizzi, E.** (2003). Combinations of muscle synergies in  
466 the construction of a natural motor behavior. *Nat Neurosci* **6**, 300-308.
- 467 **Del Vecchio, D., Murray, R. M. and Perona, P.** (2003). Decomposition of human  
468 motion into dynamics-based primitives with application to drawing tasks. *Automatica*  
469 **39**, 2085-2098.
- 470 **Feinstein, N., Neshet, N. and Hochner, B.** (2011). FUNCTIONAL  
471 MORPHOLOGY OF THE NEUROMUSCULAR SYSTEM OF THE OCTOPUS  
472 VULGARIS ARM. *Vie Milieu* **61**, 219-229.
- 473 **Fiorito, G., Affuso, A., Anderson, D. B., Basil, J., Bonnaud, L., Botta, G., Cole,**  
474 **A., D'Angelo, L., De Girolamo, P., Dennison, N. et al.** (2014). Cephalopods in  
475 neuroscience: regulations, research and the 3Rs. *Invertebrate neuroscience : IN* **14**,  
476 13-36.
- 477 **Flash, T. and Hochner, B.** (2005). Motor primitives in vertebrates and invertebrates.  
478 *Current opinion in neurobiology* **15**, 660-666.
- 479 **Gutfreund, Y., Flash, T., Fiorito, G. and Hochner, B.** (1998). Patterns of arm  
480 muscle activation involved in octopus reaching movements. *The Journal of*  
481 *neuroscience : the official journal of the Society for Neuroscience* **18**, 5976-5987.
- 482 **Gutfreund, Y., Matzner, H., Flash, T. and Hochner, B.** (2006). Patterns of motor  
483 activity in the isolated nerve cord of the octopus arm. *Biol Bull* **211**, 212-222.
- 484 **Gutfreund, Y., Flash, T., Yarom, Y., Fiorito, G., Segev, I. and Hochner, B.**  
485 (1996). Organization of octopus arm movements: a model system for studying the  
486 control of flexible arms. *The Journal of neuroscience : the official journal of the*  
487 *Society for Neuroscience* **16**, 7297-7307.
- 488 **Gutnik, T., Byrne, R. A., Hochner, B. and Kuba, M.** (2011). Octopus vulgaris  
489 uses visual information to determine the location of its arm. *Current biology : CB* **21**,  
490 460-462.
- 491 **Hayes, A. F. and Krippendorff, K.** (2007). Answering the call for a standard  
492 reliability measure for coding data. *Communication methods and measures* **1**, 77-89.
- 493 **Hochner, B.** (2012). An embodied view of octopus neurobiology. *Current biology :*  
494 *CB* **22**, R887-892.
- 495 **Kawato, M.** (1999). Internal models for motor control and trajectory planning.  
496 *Current opinion in neurobiology* **9**, 718-727.
- 497 **Kier, W. M. and Smith, K. K.** (1985). TONGUES, TENTACLES AND TRUNKS -  
498 THE BIOMECHANICS OF MOVEMENT IN MUSCULAR-HYDROSTATS. *Zool.*  
499 *J. Linn. Soc.* **83**, 307-324.
- 500 **Mistry, M., Theodorou, E., Schaal, S. and Kawato, M.** (2013). Optimal control of  
501 reaching includes kinematic constraints. *Journal of neurophysiology* **110**, 1-11.
- 502 **Moro, F. L., Tsagarakis, N. G. and Caldwell, D. G.** (2012). On the Kinematic  
503 Motion Primitives (kMPs) - Theory and Application. *Front Neurorobot* **6**, 10.



- 504 **Pfeifer, R., Iida, F. and Lungarella, M.** (2014). Cognition from the bottom up: on  
 505 biological inspiration, body morphology, and soft materials. *Trends Cogn Sci* **18**, 404-  
 506 413.
- 507 **Sosnik, R., Hauptmann, B., Karni, A. and Flash, T.** (2004). When practice leads to  
 508 co-articulation: the evolution of geometrically defined movement primitives. *Exp*  
 509 *Brain Res* **156**, 422-438.
- 510 **Sumbre, G., Fiorito, G., Flash, T. and Hochner, B.** (2005). Neurobiology: motor  
 511 control of flexible octopus arms. *Nature* **433**, 595-596.
- 512 **Sumbre, G., Fiorito, G., Flash, T. and Hochner, B.** (2006). Octopuses use a human-  
 513 like strategy to control precise point-to-point arm movements. *Current biology : CB*  
 514 **16**, 767-772.
- 515 **Sumbre, G., Gutfreund, Y., Fiorito, G., Flash, T. and Hochner, B.** (2001). Control  
 516 of octopus arm extension by a peripheral motor program. *Science* **293**, 1845-1848.
- 517 **Wells, M. J.** (1978). Octopus. Physiology and Behaviour of an Advanced  
 518 Invertebrate: Chapman and Hall.
- 519 **Woltring, H. J. and Huiskes, R.** (1990). Stereophotogrammetry. *Biomechanics of*  
 520 *human movement*, 108-127.
- 521 **Wood, G. A. and Marshall, R. N.** (1986). The accuracy of DLT extrapolation in  
 522 three-dimensional film analysis. *J Biomech* **19**, 781-785.
- 523 **Young, J. Z.** (1971). The Anatomy of the Nervous System of Octopus vulgaris: Ox.
- 524 **Zheng, T., Branson, D. T., Guglielmino, E., Kang, R., Cerda, G. A. M.,**  
 525 **Cianchetti, M., Follador, M., Godage, I. S. and Caldwell, D. G.** (2013). Model  
 526 Validation of an Octopus Inspired Continuum Robotic Arm for Use in Underwater  
 527 Environments. *Journal of Mechanisms and Robotics* **5**, 021004.
- 528 **Zullo, L., Sumbre, G., Agnisola, C., Flash, T. and Hochner, B.** (2009).  
 529 Nonsomatotopic organization of the higher motor centers in octopus. *Current biology*  
 530 : *CB* **19**, 1632-1636.

531

532 **ACKNOWLEDGMENTS**

533

534 We express our sincere gratitude to Vered Kellner for helpful comments on this study  
 535 and Tamar Gutnick for help on statistical software and data analysis.

536

537 **FUNDING**

538

539 This study was supported by the European Commission under the 7<sup>th</sup> Framework  
 540 Programme in the theme of the Future and Emerging Technologies (FET)  
 541 (OCTOPUS IP, FP7-ICT 2007.8.5, FET) [231608].

542

543 **COMPETING INTERESTS**

544

545 The authors declare no competing financial interests.

546

547 **AUTHOR CONTRIBUTIONS**

548

549 J.N.R. and M. J.K. designed the study and carried out the behavioral experiments,

550 J.N.R. analyzed the data, J.N.R, B.H. and M.J.K. discussed the results and drafted the

551 manuscript.

552

553 *Table 1: Distribution of categories among the first ten trials*

554

|                             |    | <b>Animal 1</b> | <b>Animal 2</b> | <b>Animal 3</b> | <b>Animal 4</b> | <b>Animal 5</b> | <b>Animal 6</b> |
|-----------------------------|----|-----------------|-----------------|-----------------|-----------------|-----------------|-----------------|
| <b>Trial</b>                | 1  | Deflected       | Deflected       | Straight        | Straight        | Straight        | Straight        |
|                             | 2  | Deflected       | Deflected       | Deflected       | Deflected       | Straight        | Straight        |
|                             | 3  | Deflected       | Straight        | Straight        | Straight        | Straight        | Straight        |
|                             | 4  | Deflected       | Deflected       | Deflected       | Straight        | Straight        | Straight        |
|                             | 5  | Deflected       | Deflected       | Straight        | Straight        | Straight        | Straight        |
|                             | 6  | Deflected       | Straight        | Straight        | Straight        | Straight        | Straight        |
|                             | 7  | Deflected       | Straight        | Straight        | Straight        | Straight        | Deflected       |
|                             | 8  | Straight        | Deflected       | Straight        | Straight        | Deflected       | Straight        |
|                             | 9  | Deflected       | Straight        | Deflected       | Straight        | Straight        | Straight        |
|                             | 10 | Straight        | Straight        | Straight        | Deflected       | Deflected       | Deflected       |
| <i>One-sample runs test</i> |    |                 |                 |                 |                 |                 |                 |
| <b>r =</b>                  |    | 4               | 6               | 7               | 4               | 4               | 4               |
| <b>p =</b>                  |    | 1               | 1               | 0.287           | 1               | 1               | 1               |

555

556 **Figure texts**

557

558 **Figure 1** Picture sequence of typical straight reaching and fetching movements in a

559 constrained situation. Octopuses are behind a Perspex wall and reach or fetch through

560 a hole with a single arm (indicated in red). A Straight reaching toward a target is done

561 with a typical bend propagation, which is set up by building up an arm loop at the

562 hole. White arrow points at arm bend. Seconds 0.3 – 0.6 show building up of the arm  
563 loop; seconds 1.4 - 1.8 show bend propagation toward the target; seconds 2.4 show  
564 arm hitting the target. Blue ring highlights the hole; **B** Straight fetching of a food item  
565 (white object). Frame at 0.2 seconds shows the arm attached to target; seconds 0.4 –  
566 1.5 show linear point-to-point pull-in movement. Arrows at second 0.8 mark two  
567 bends of the S-shape grip of the food item (white). Colors, brightness and contrast  
568 were altered to highlight arm movements.

569

570 **Figure 2** Comparison of normalized tangential velocity profiles during reaching tasks.  
571 **A** unconstrained animals (taken from Gutfreund et al., 1996) and **B** constrained  
572 animals. Both graphs show bell shaped curves, aligned at peak velocity and with axes  
573 normalized for time and velocity.

574

575 **Figure 3** Kinematic profiles of typical waving-like motions. **A** 3D reconstruction of  
576 the trajectory of an arm. One circle represents the site of the attached food item on the  
577 arm in a single frame of a picture sequence with 25fps. Red circle marks the site of  
578 the target. The axes are in cm. **B** Normalized tangential velocity profile

579

580 **Figure 4** Comparison of reaching durations. Reaching durations (in seconds) for  
581 reaching of the straight and waving-like category. Asterisk denotes significance  $p <$   
582 0.05

583

584 **Figure 5** Number of choices in respective reaching category waving and straight, split  
585 in three trial bins for each animal. Significant differences between the first and third  
586 trial bin were recorded in Animal 3 and Animal 5. Asterisks denote significance  $p <$   
587 0.05.

588

589 **Figure 6** Kinematic profiles of fetchings of the straight and the deflected category. **A**,  
590 **C** 3D reconstruction of typical arm trajectories for each respective category. One  
591 circle represents the site of the attached food on the arm in a single frame of a picture  
592 sequence with 25 fps. Red circles mark the site of the hole. The axes are in cm. **B**, **D**

593 Normalized tangential velocity profiles. One trial is shown for clarity in the deflected  
594 category.

595

596 **Figure 7** Number of choices in respective fetching category straight and deflected,  
597 split in three trial bins for each animal. No significant differences were recorded  
598 between the first and third trial bin in each category per animal.

599

600

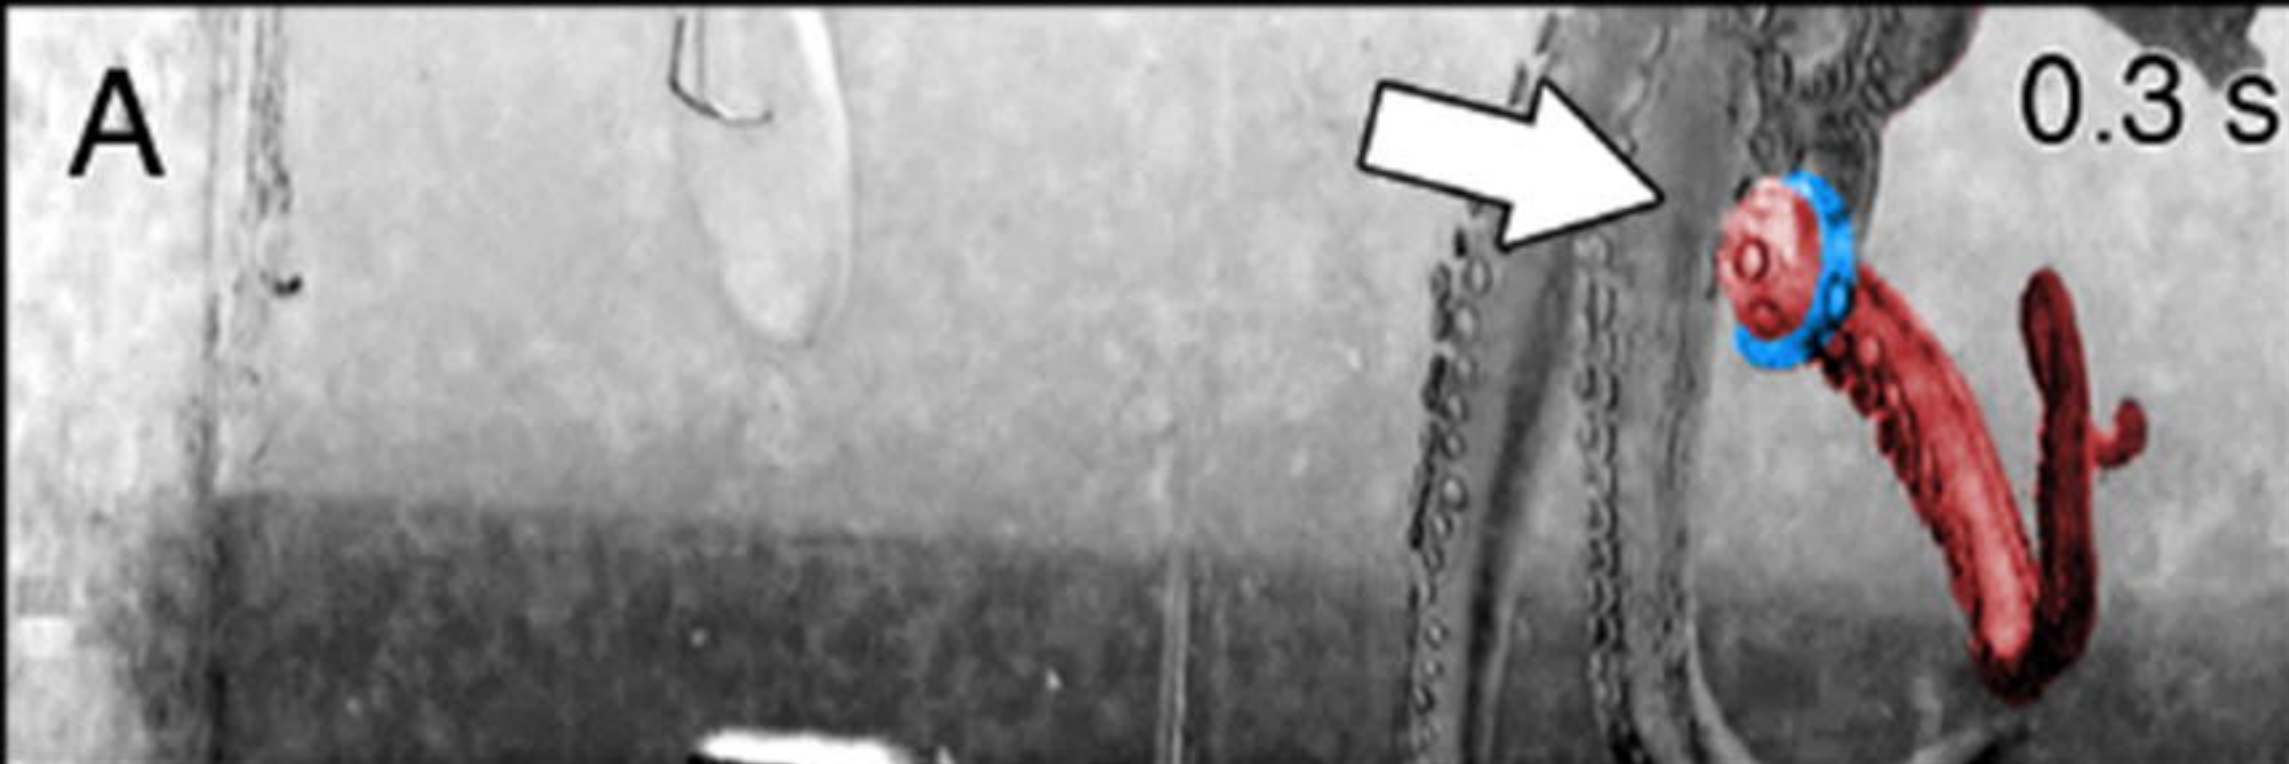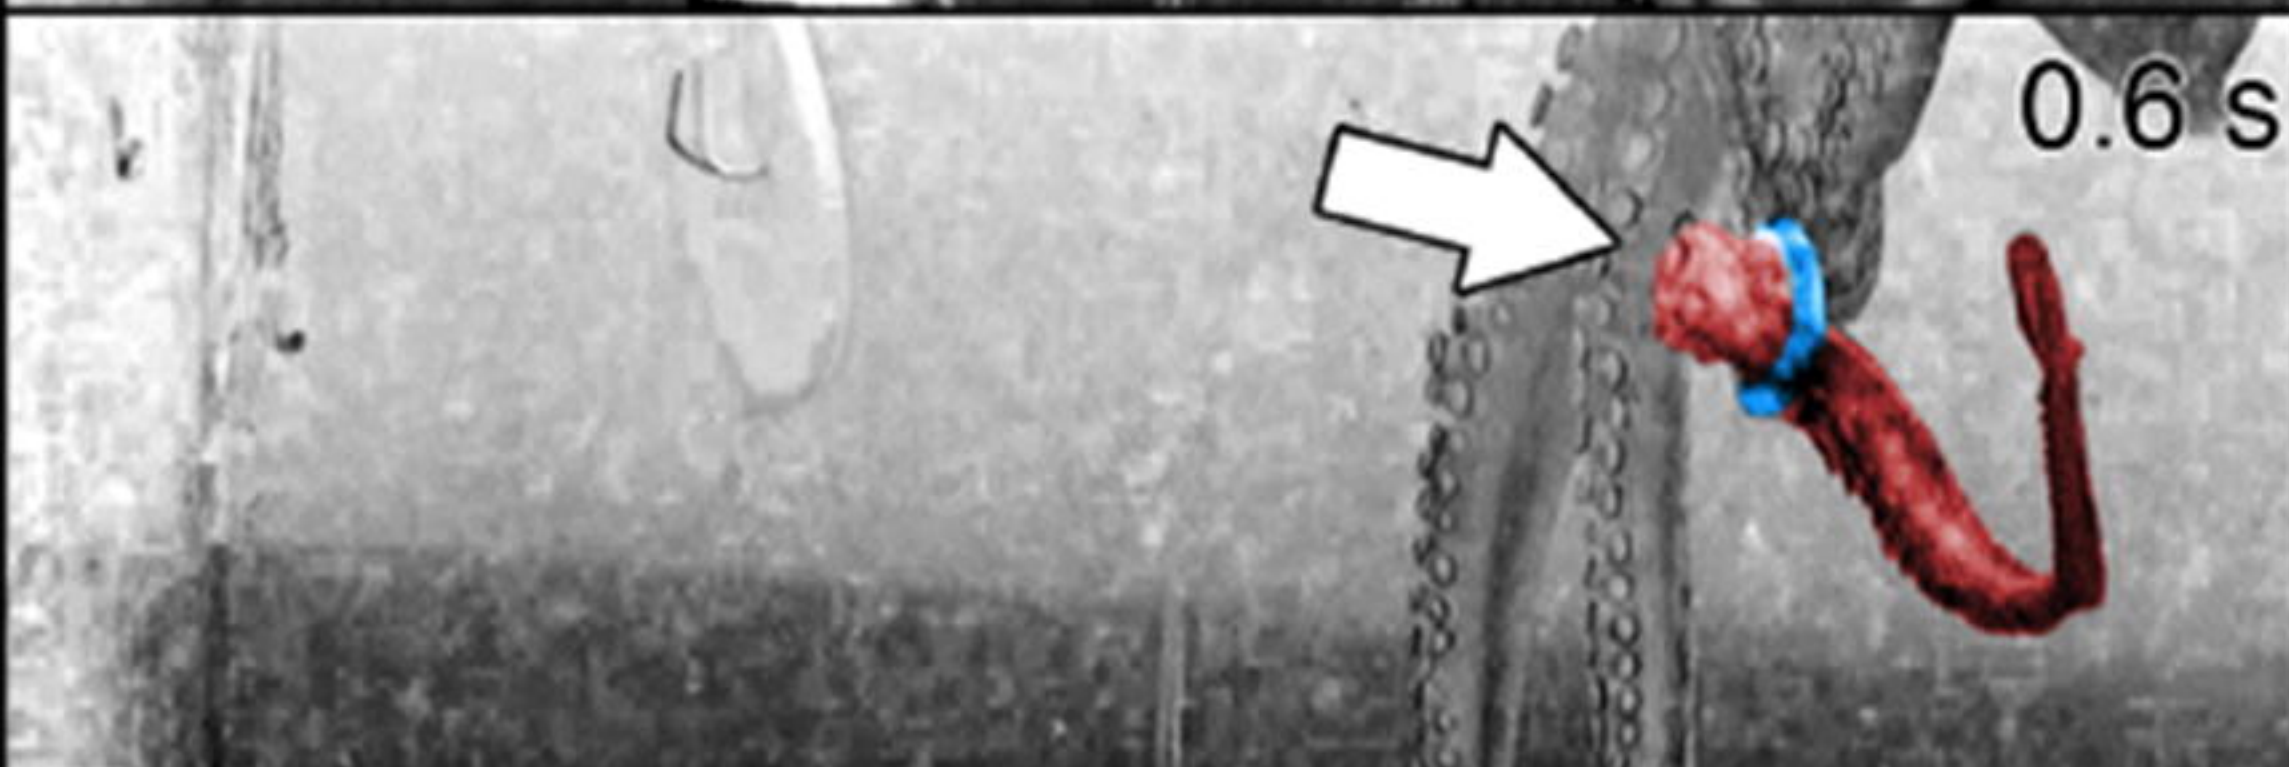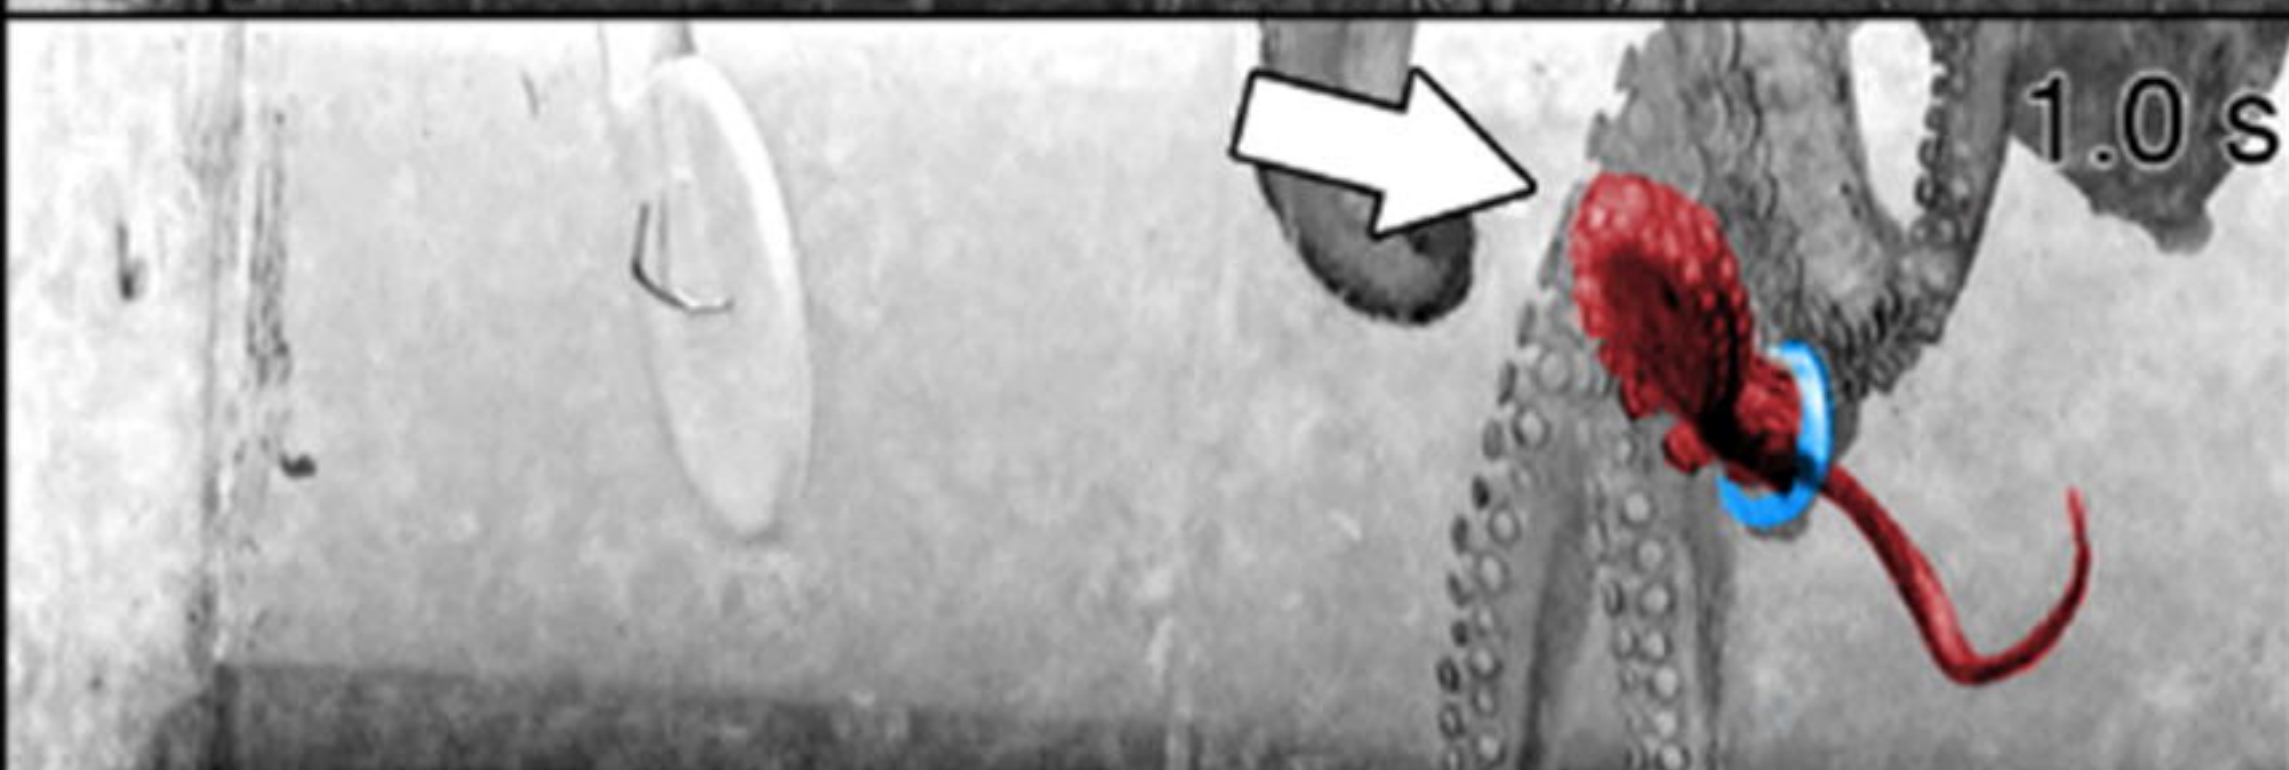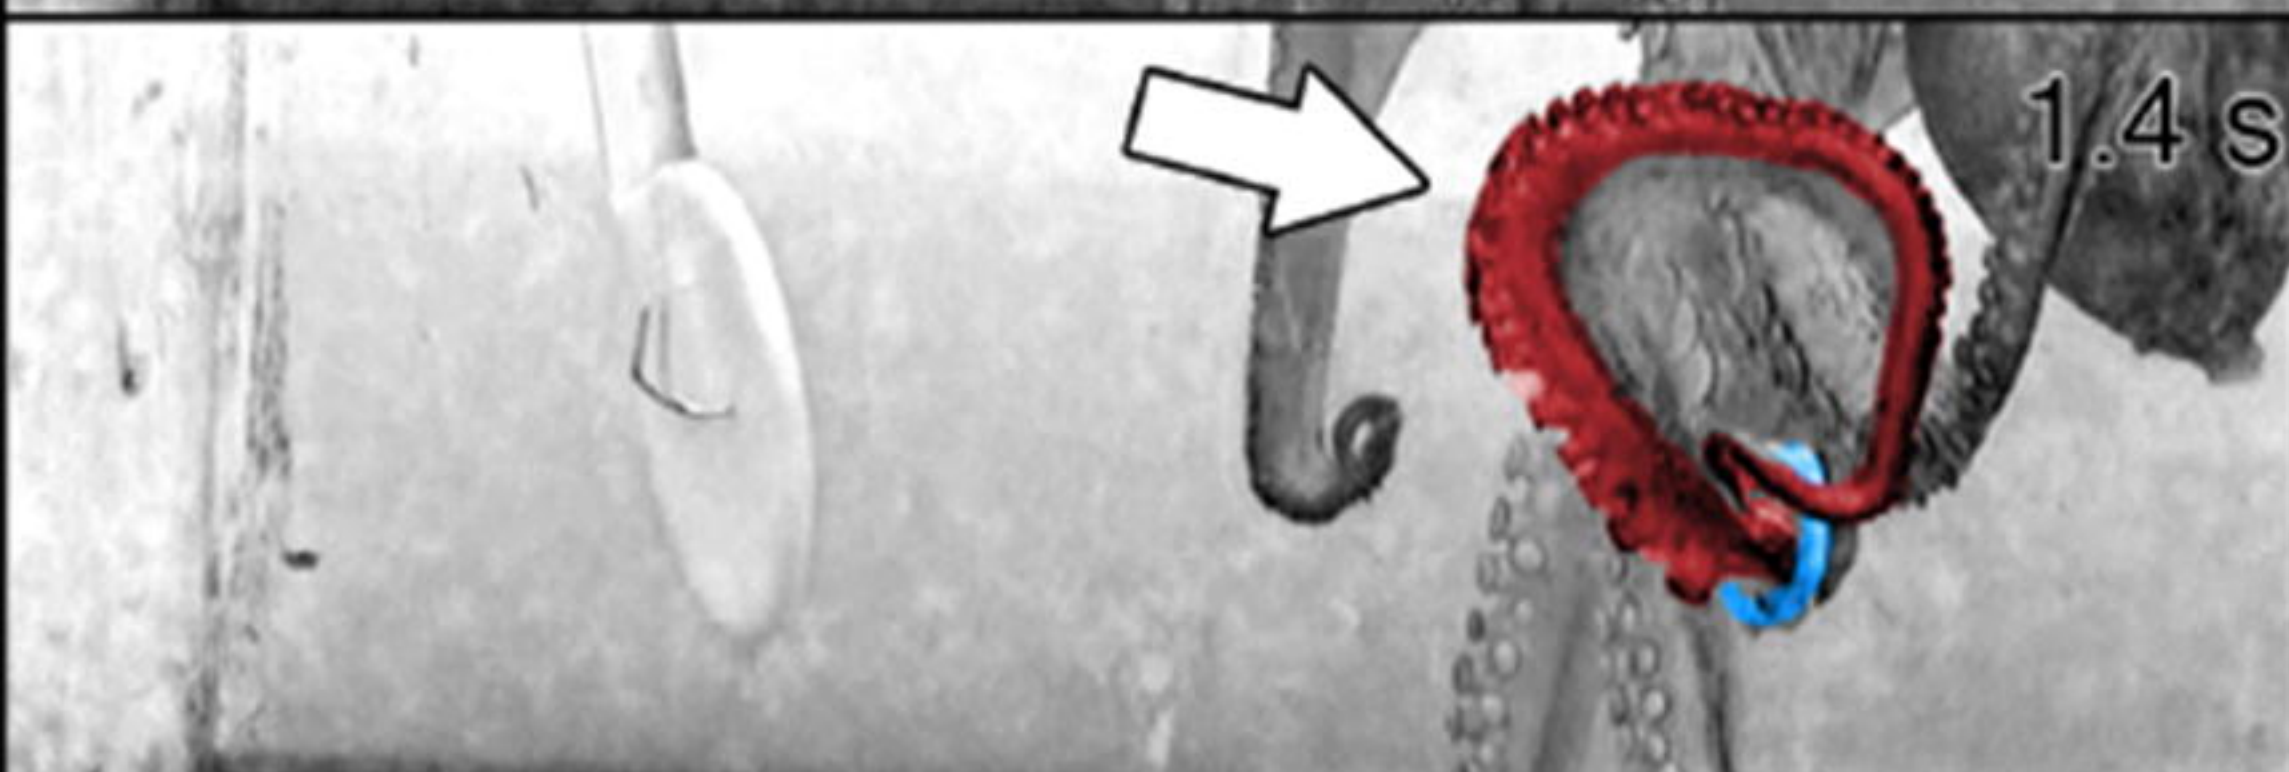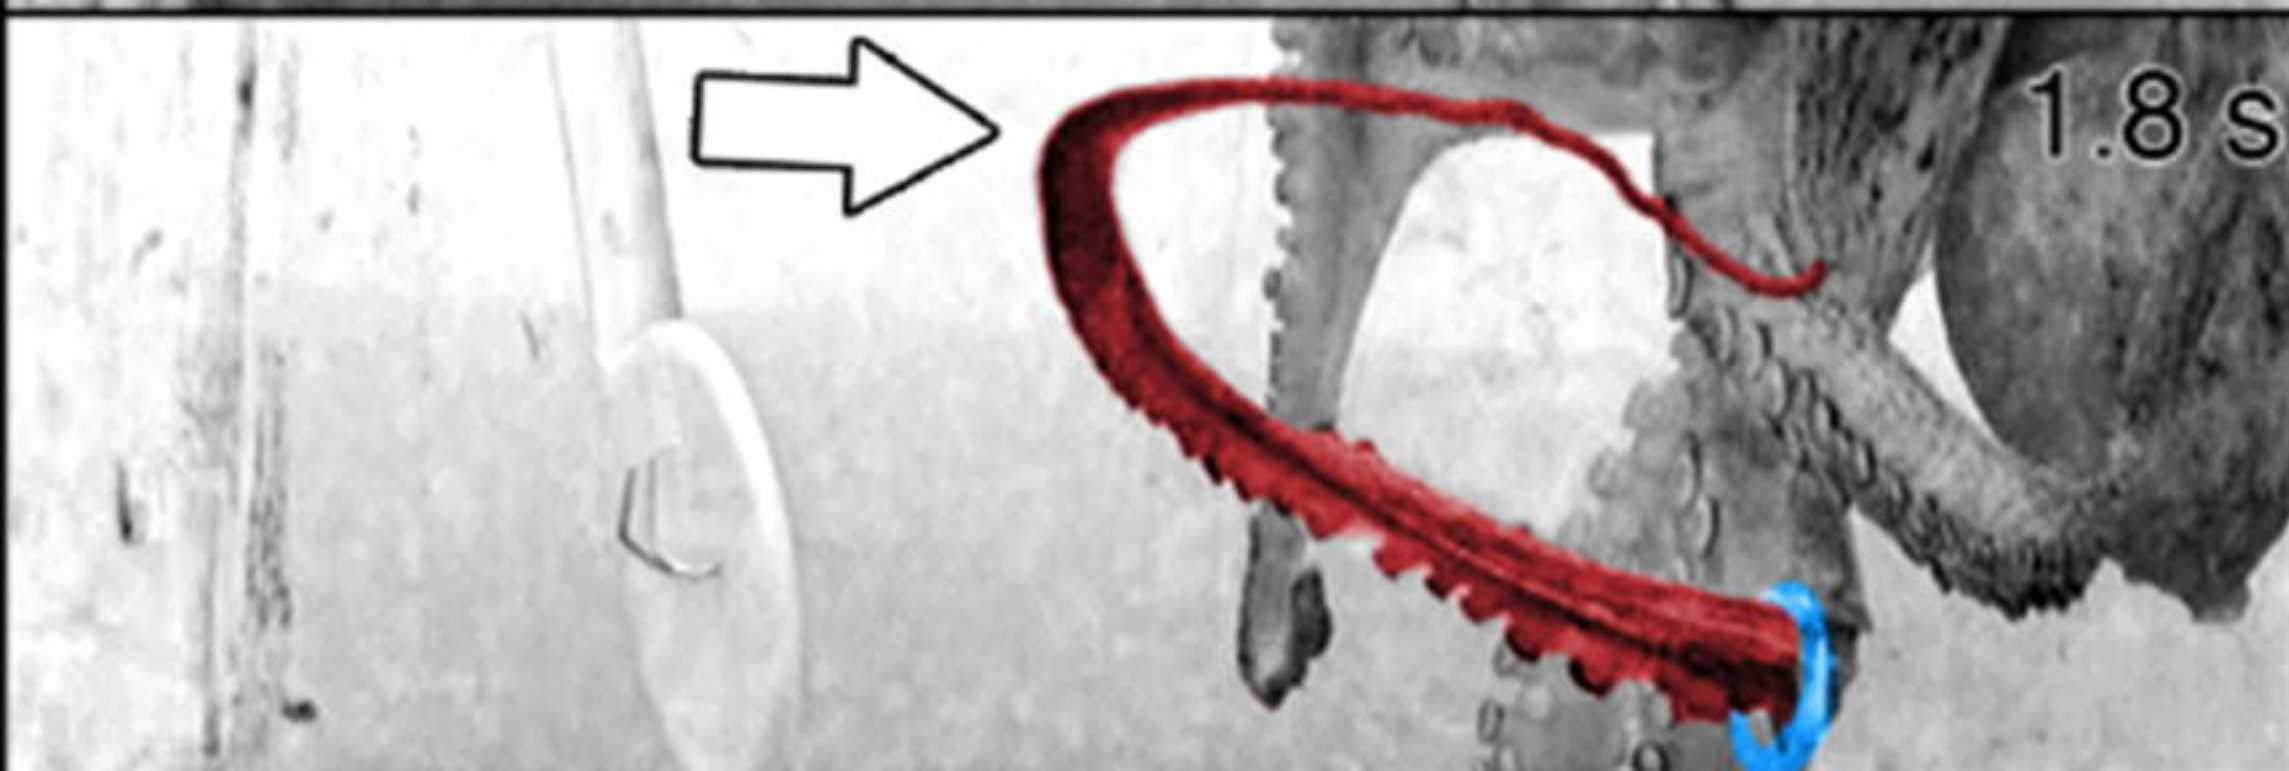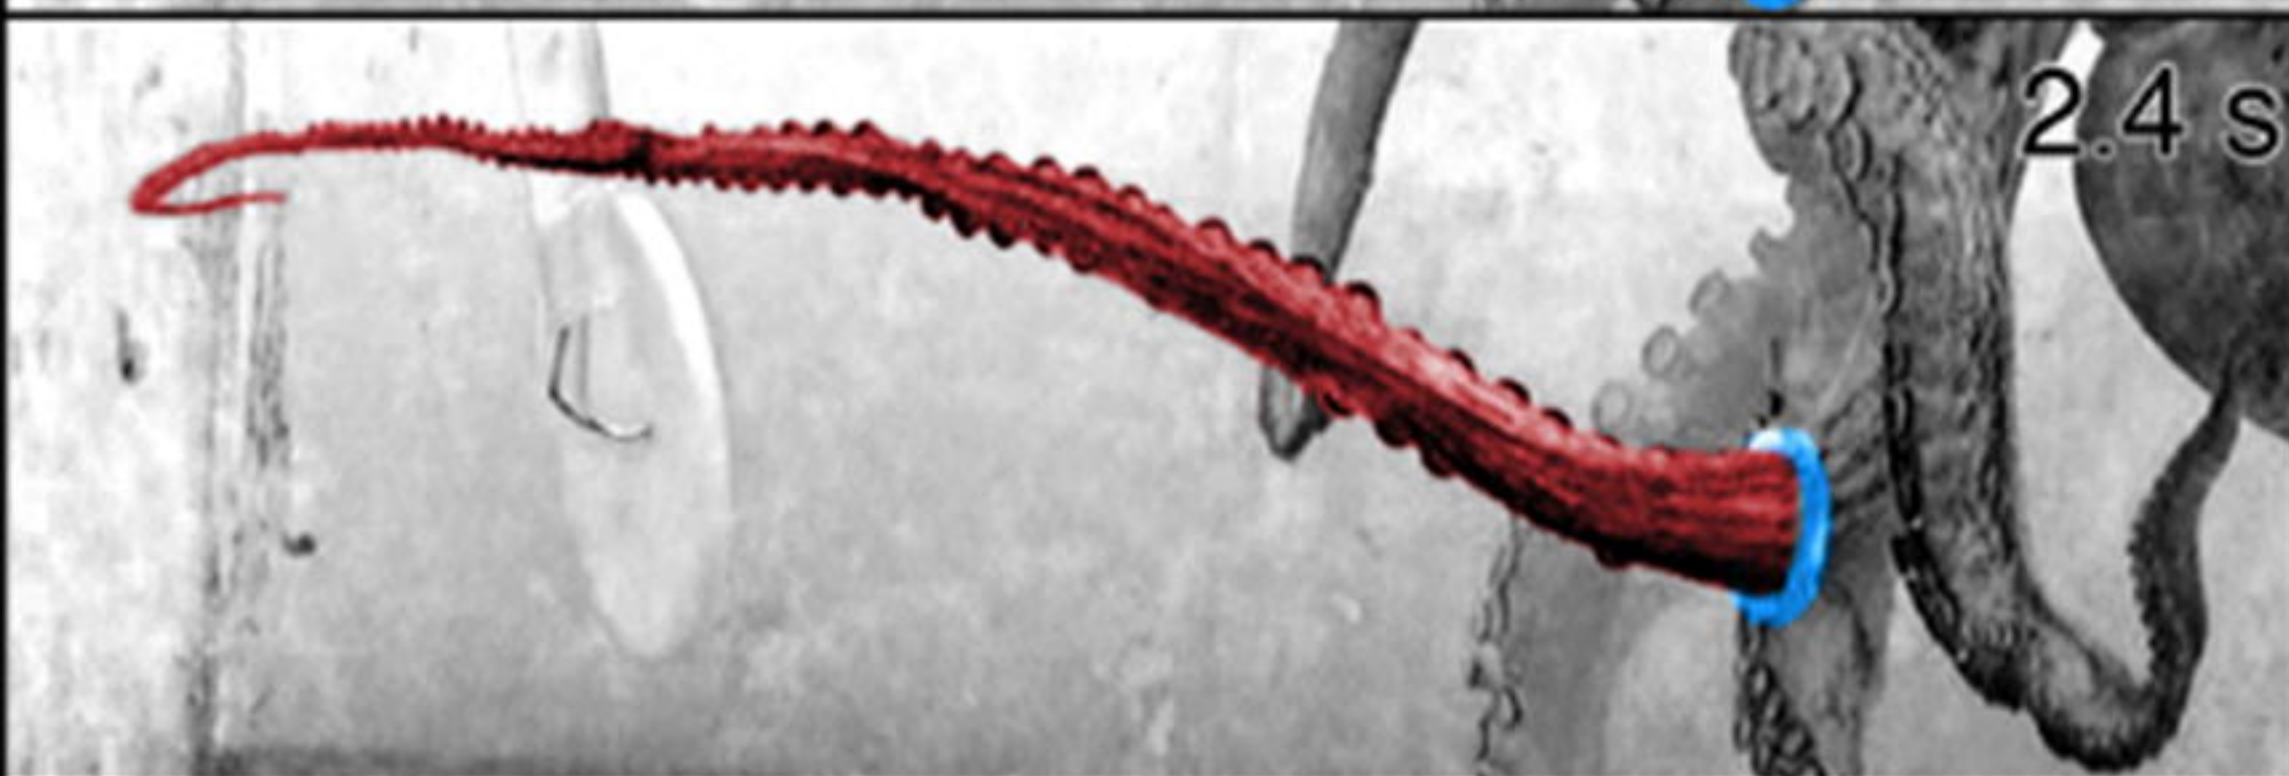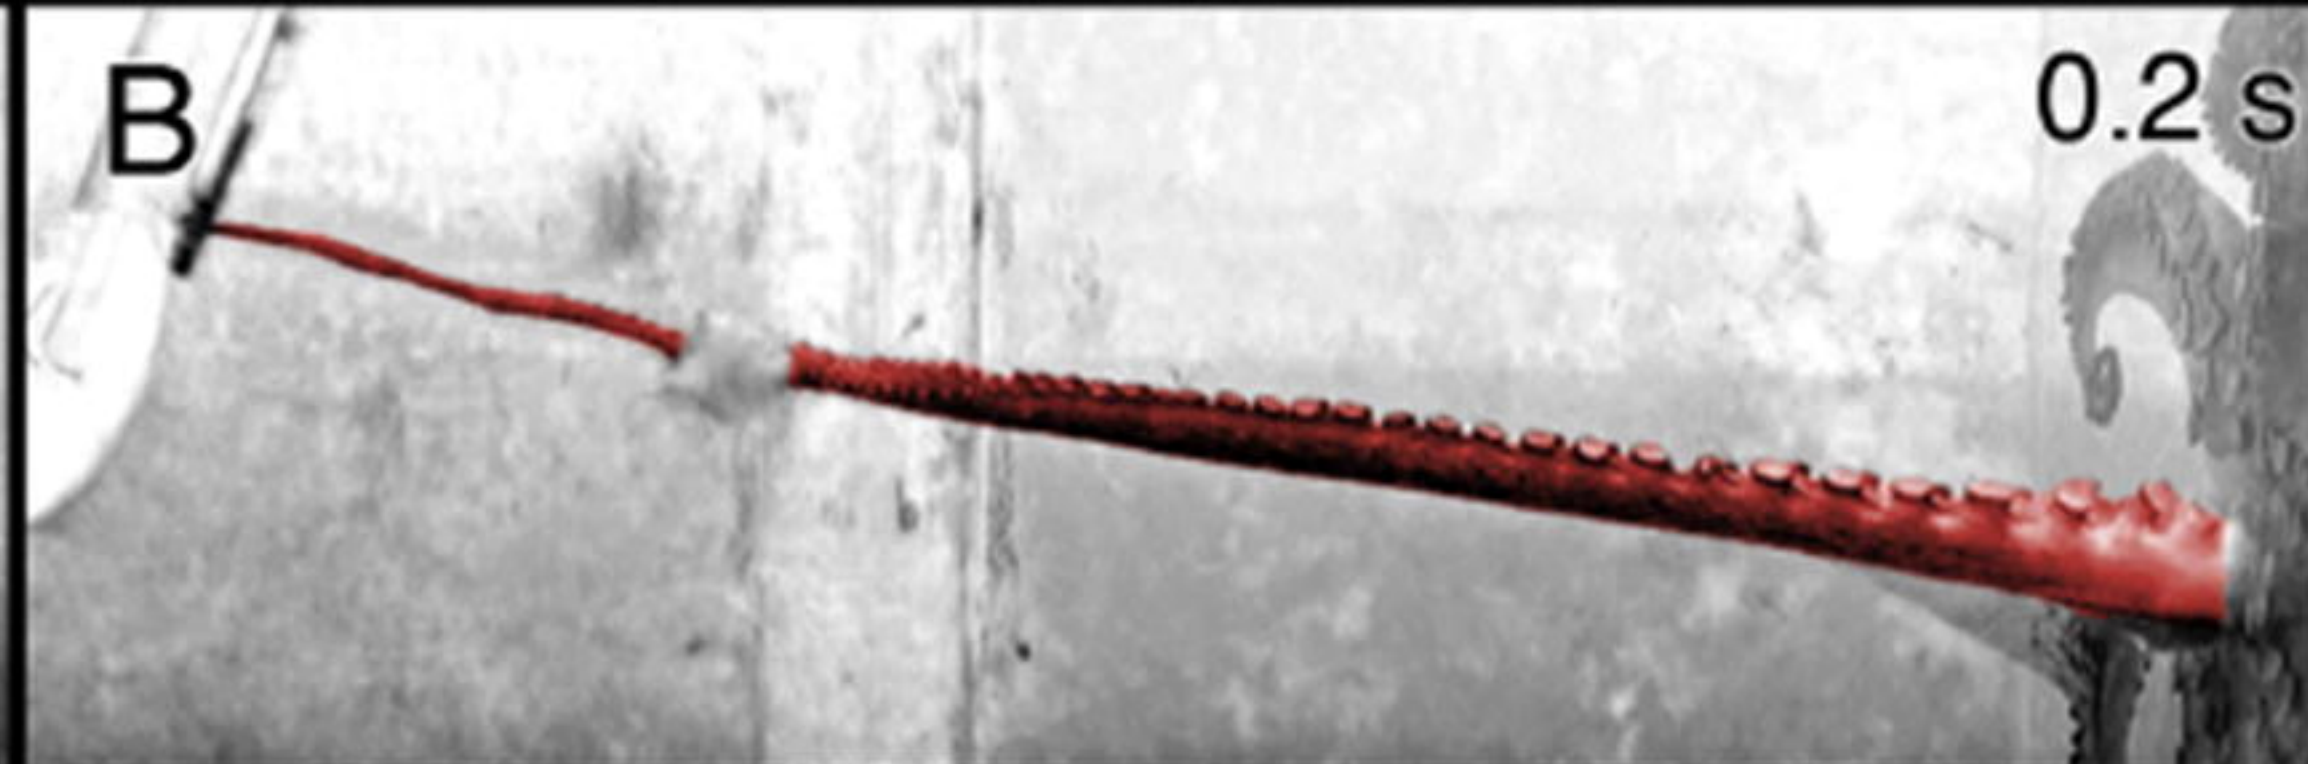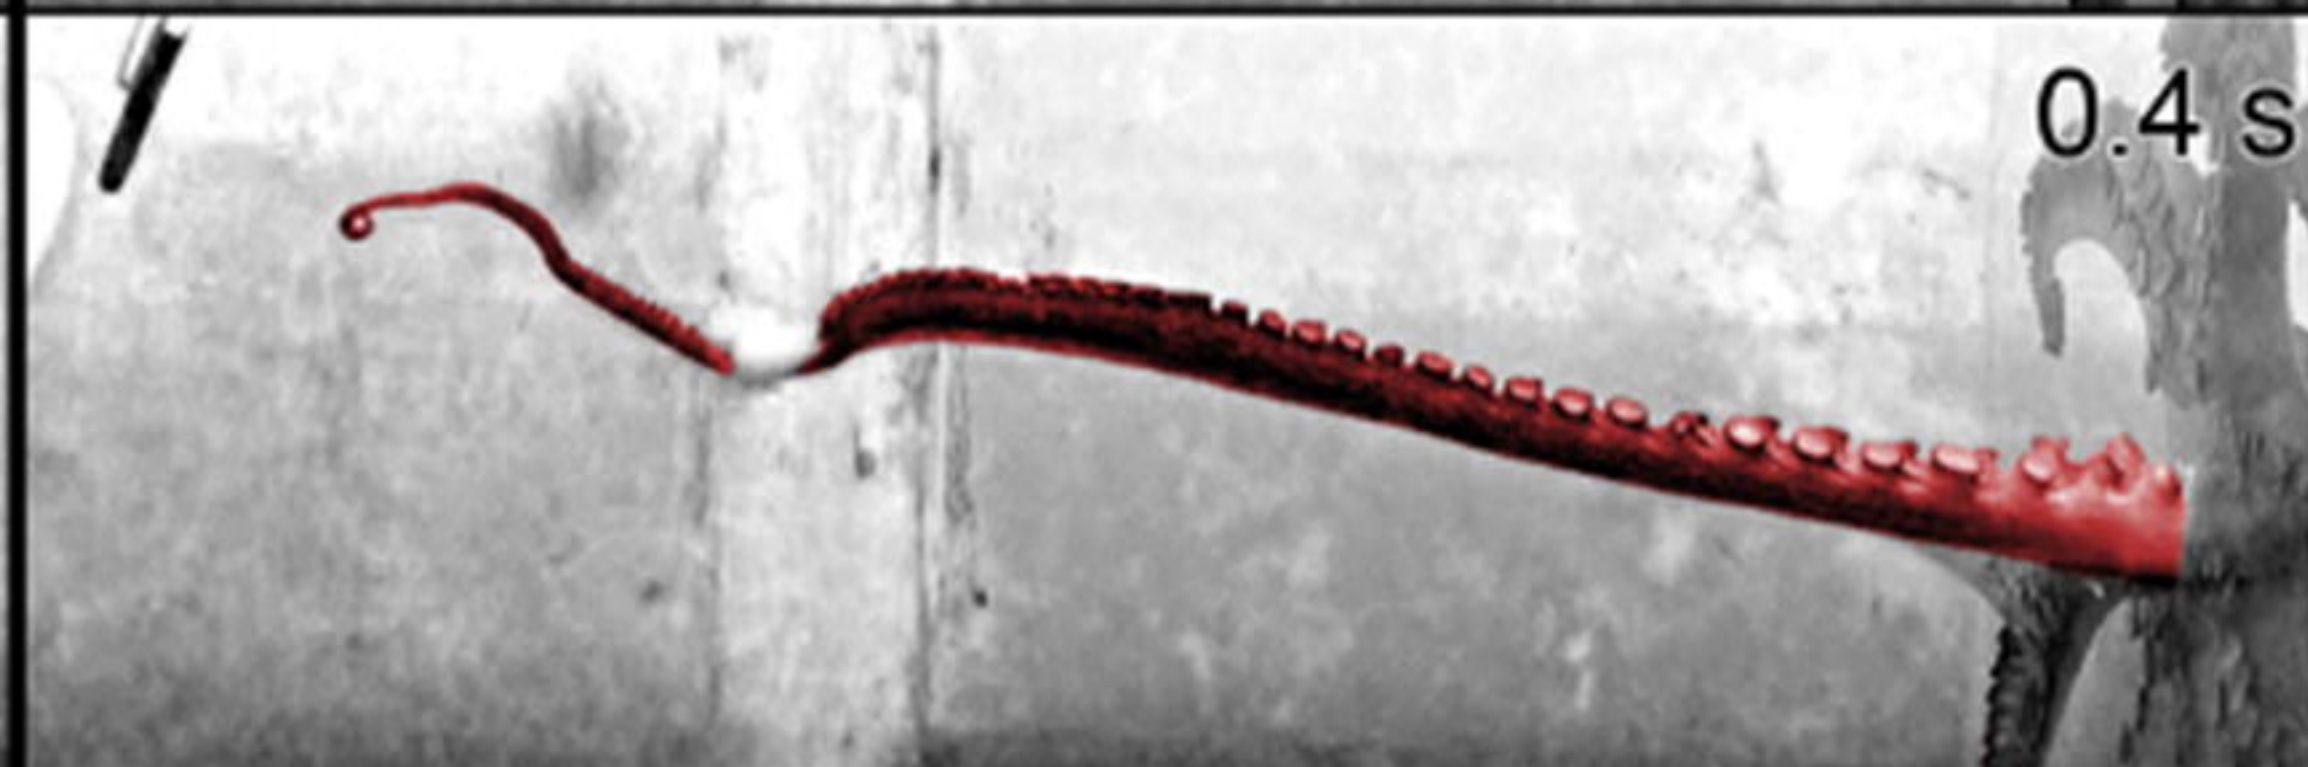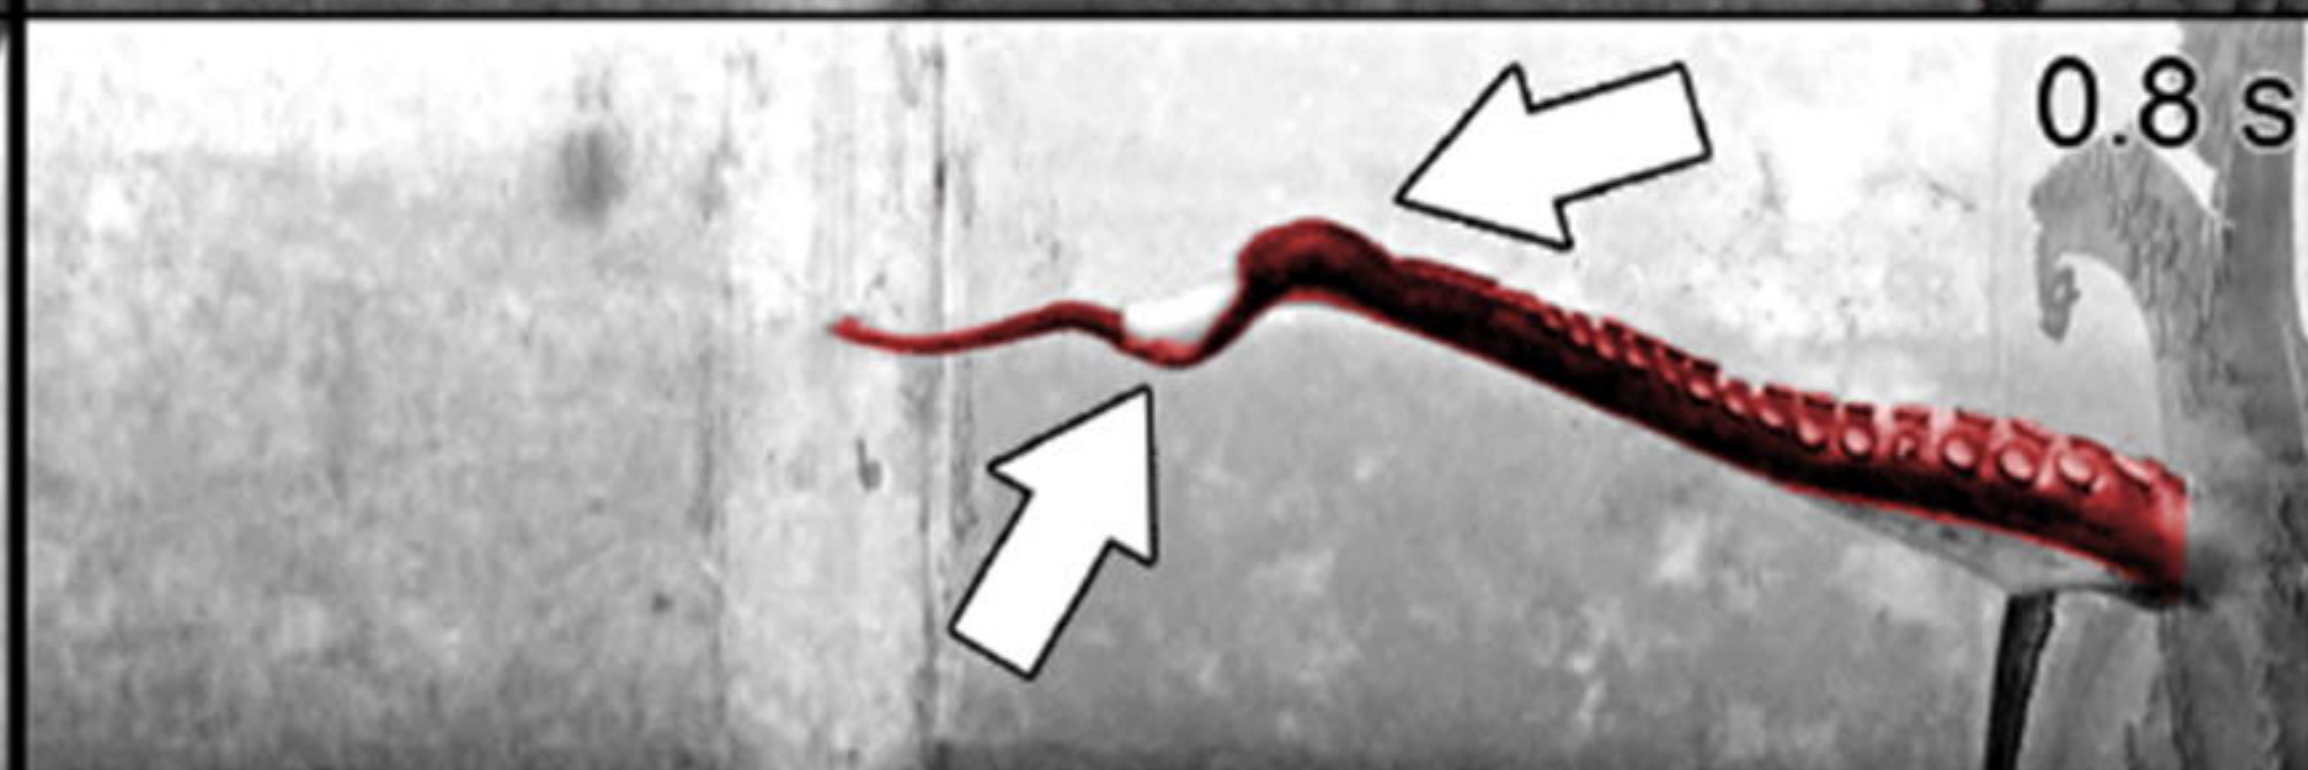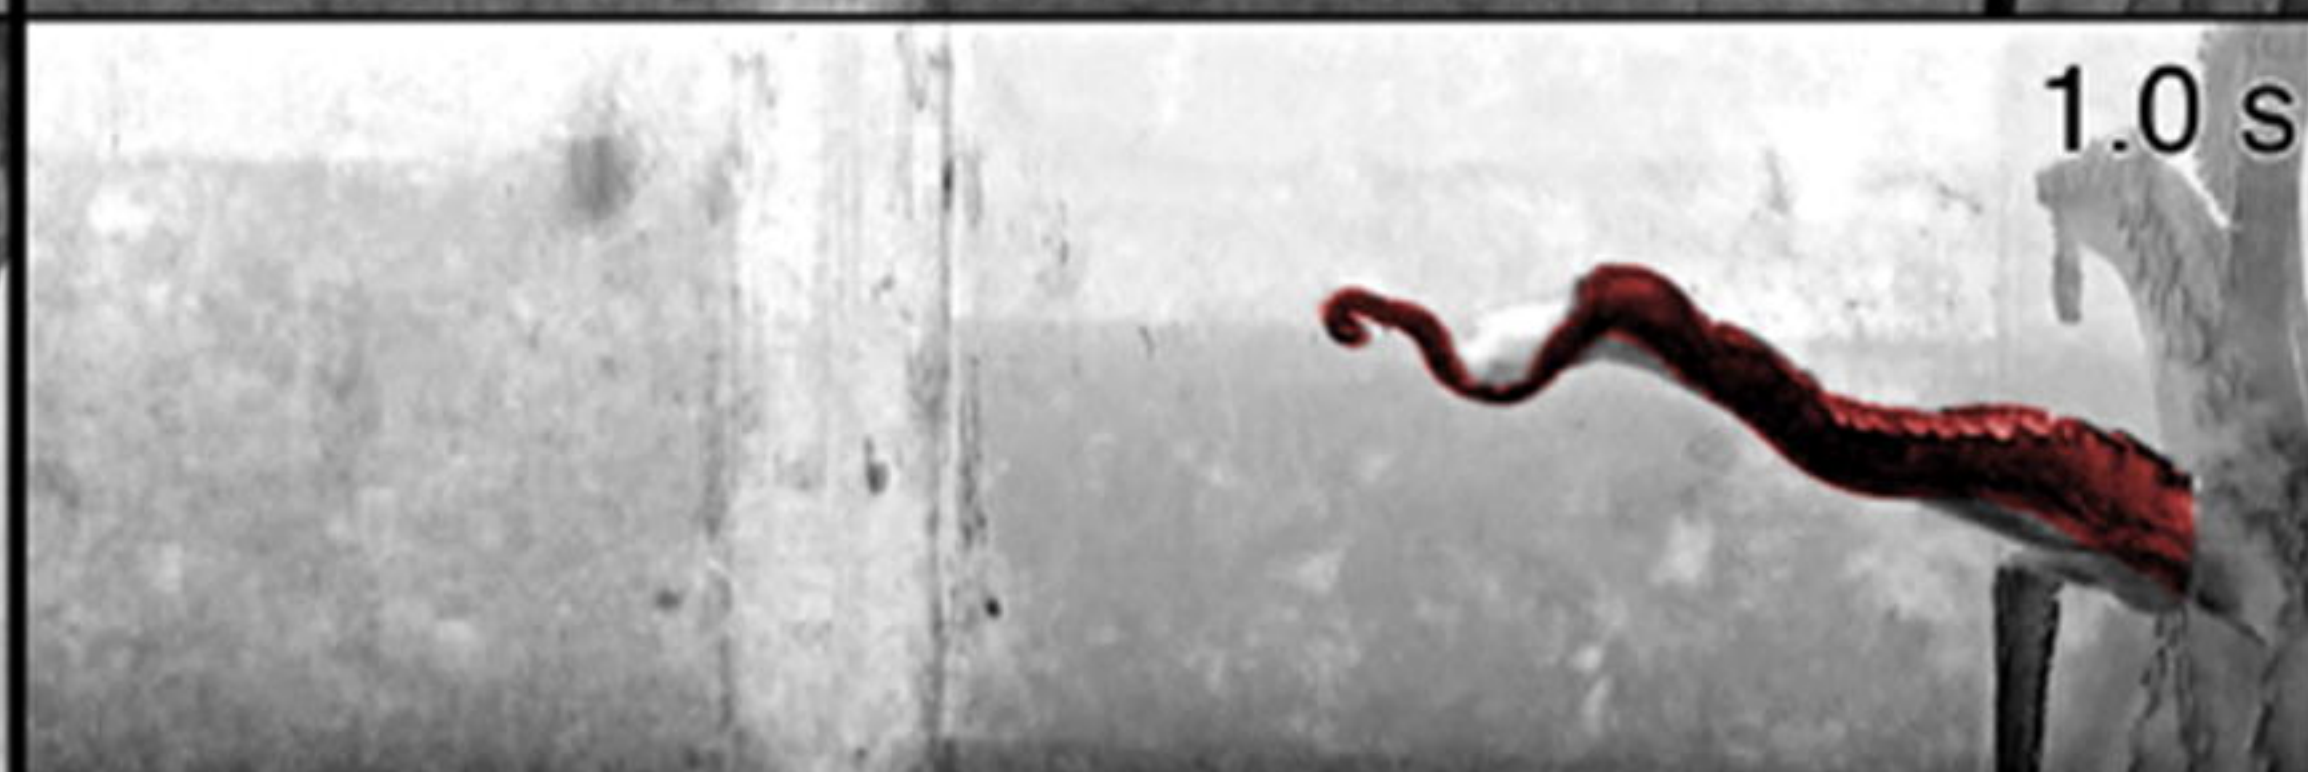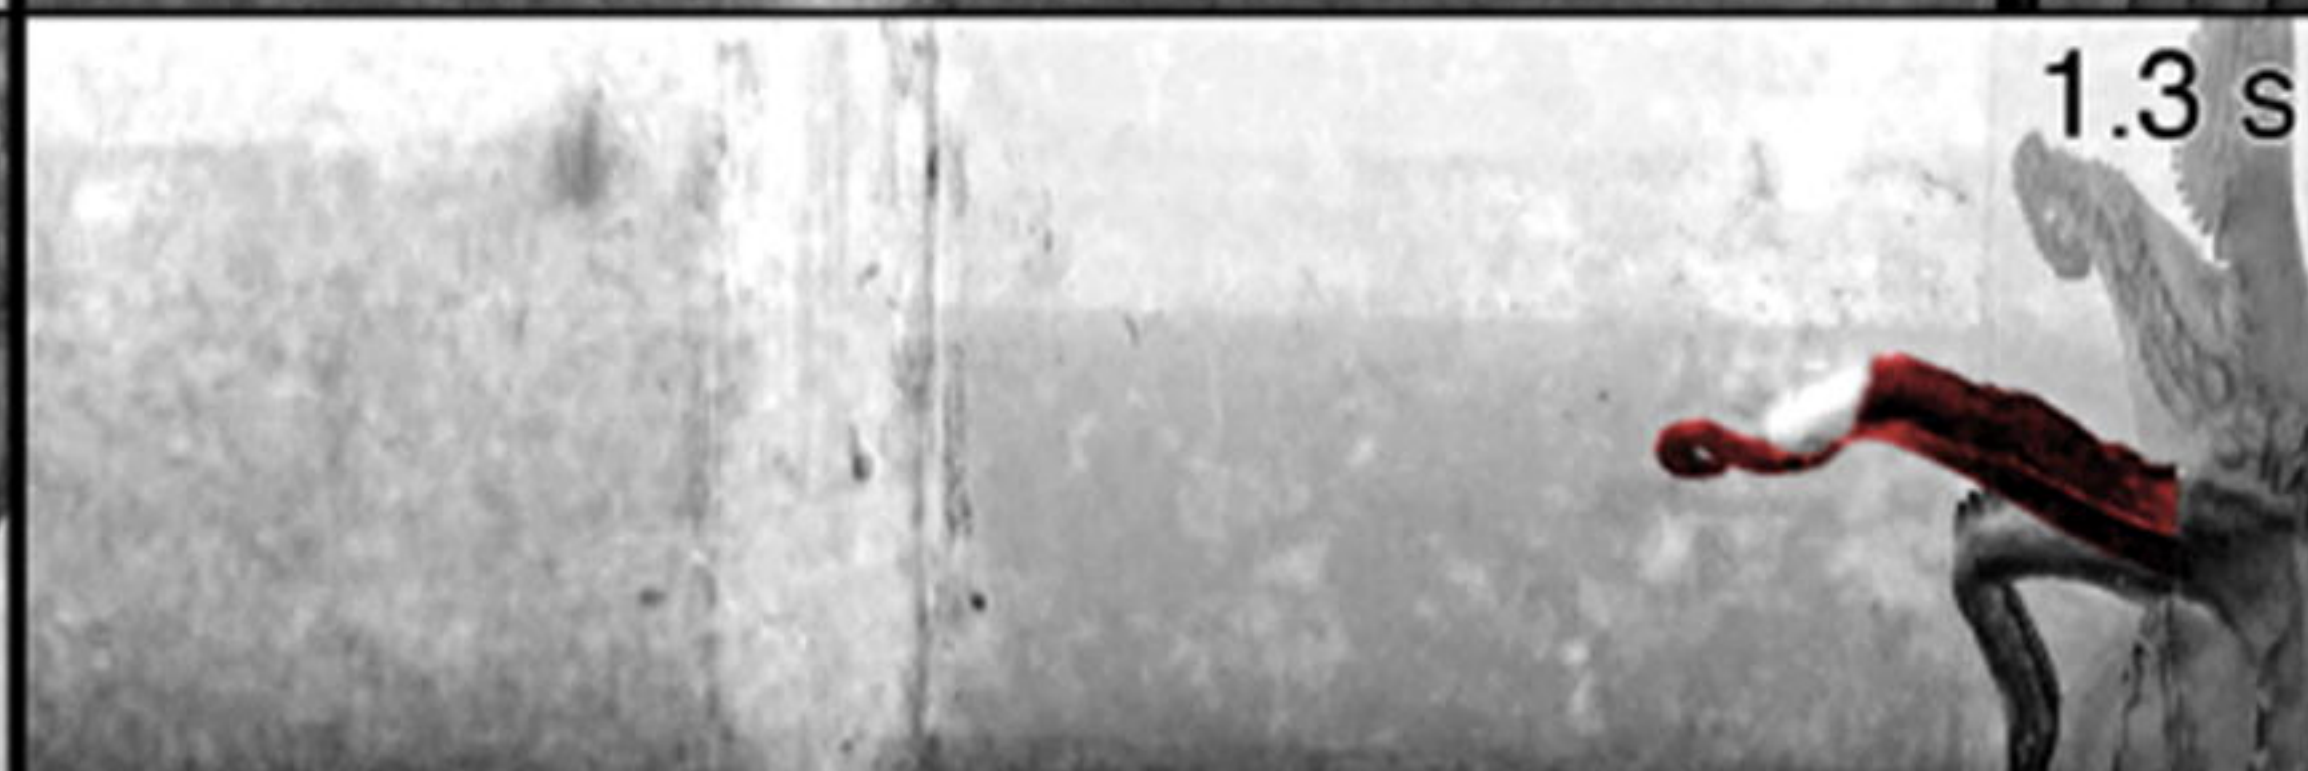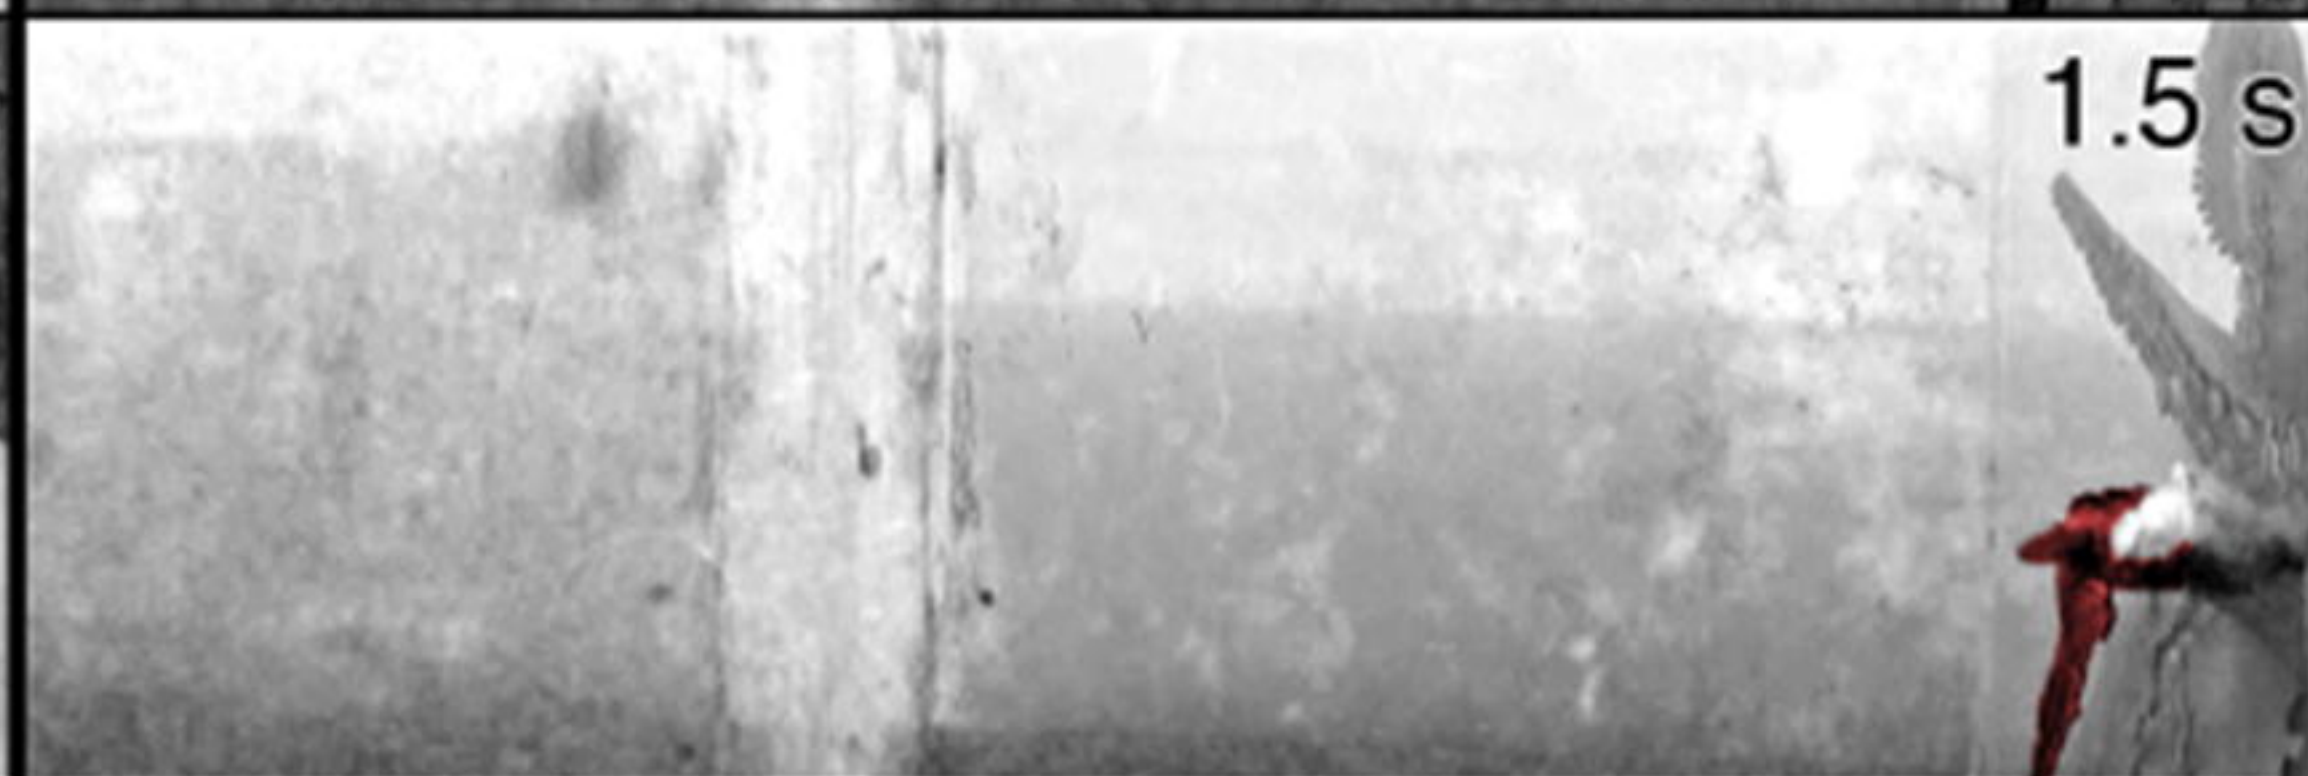

**A.** Unconstrained animals

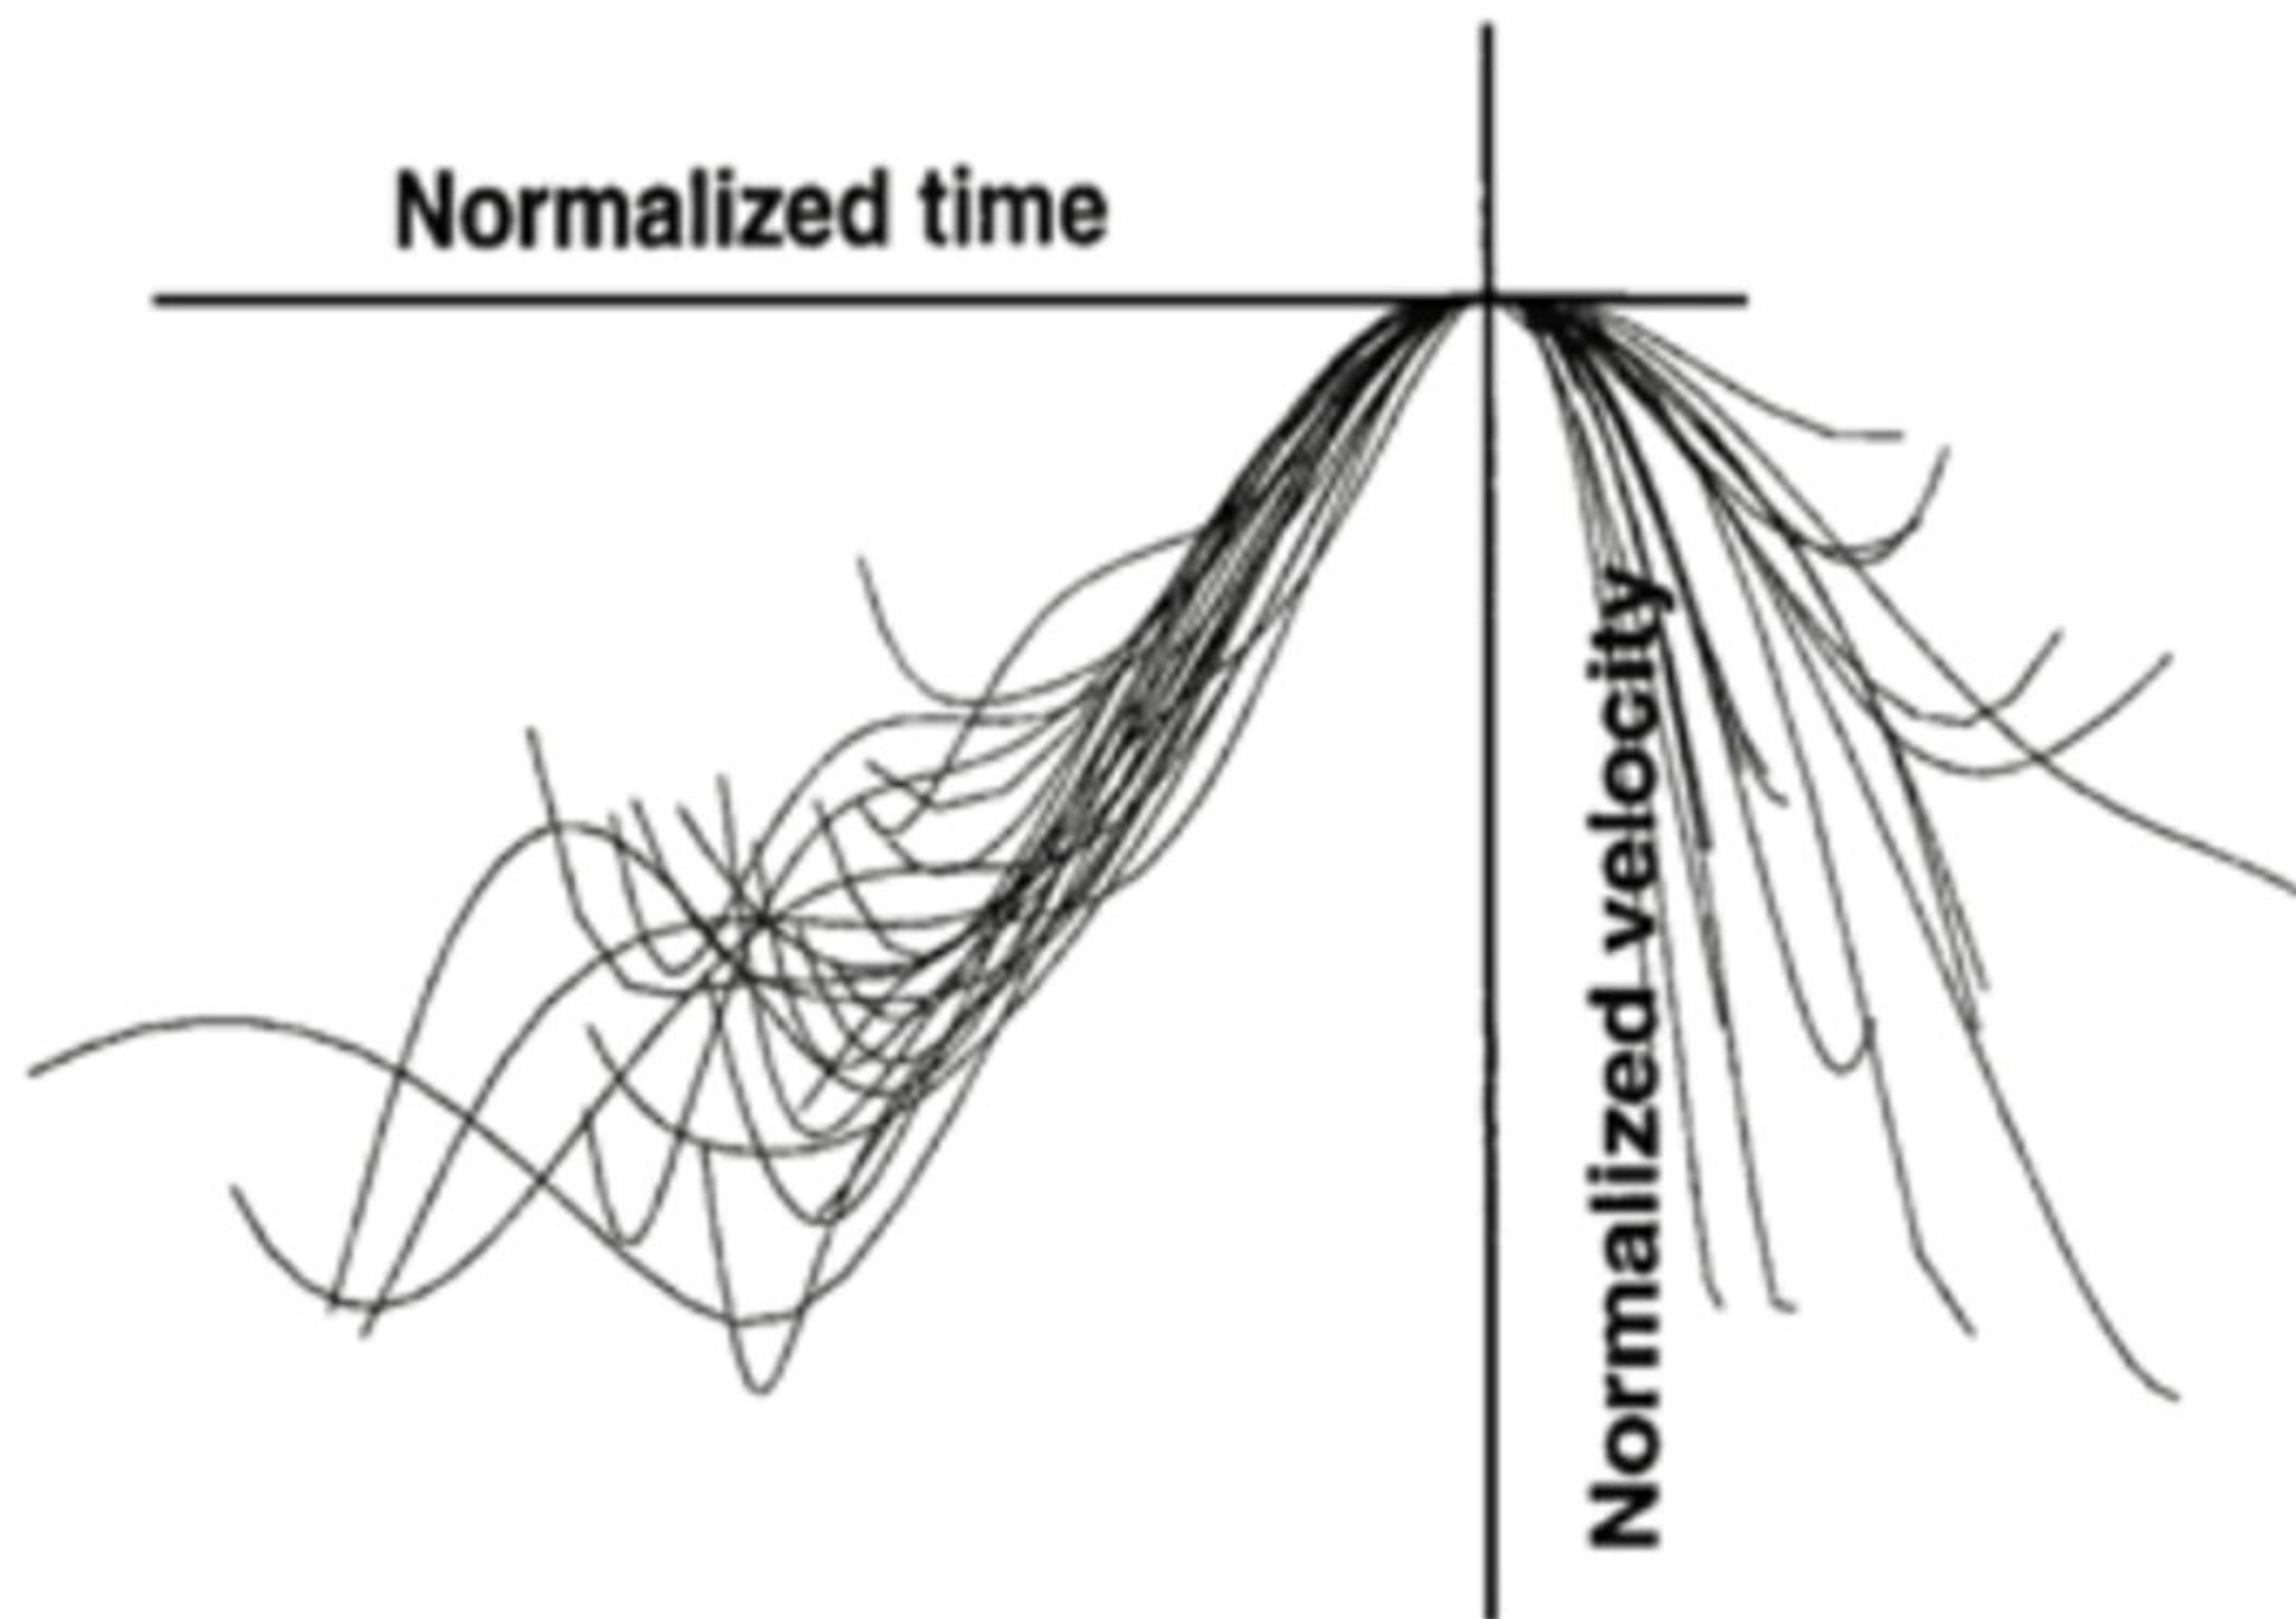

**B.** Constrained animals

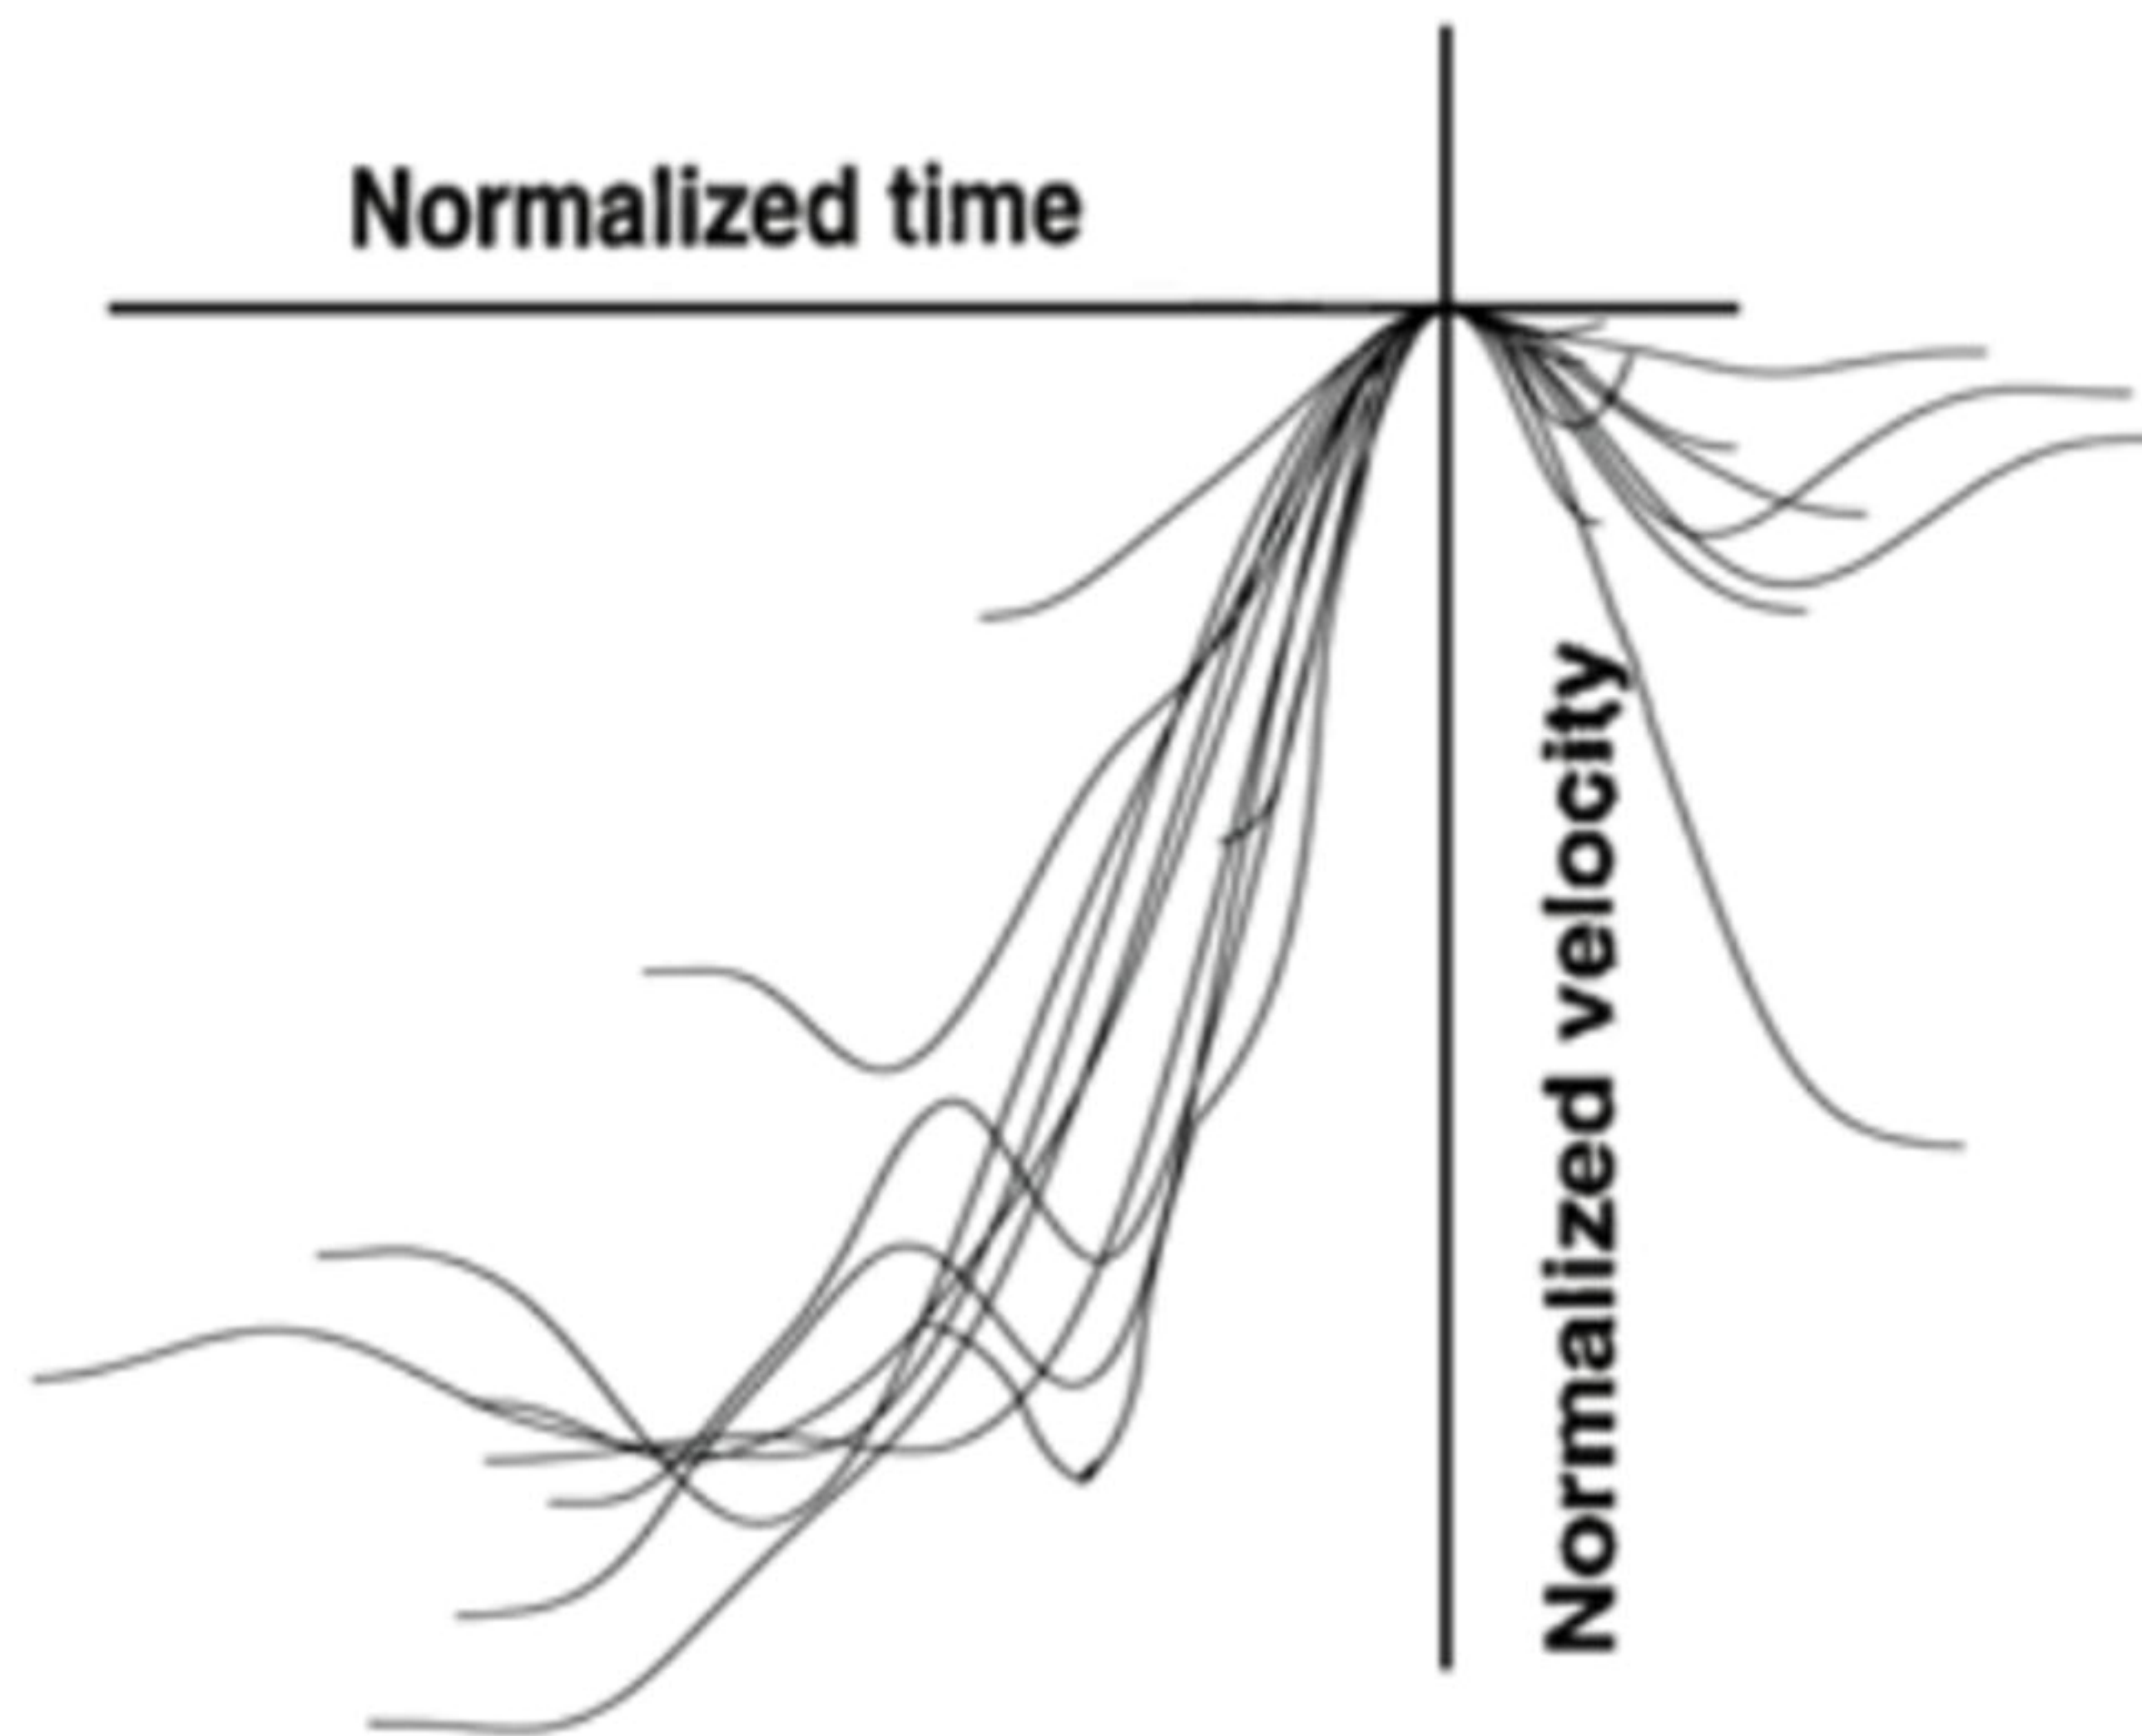

**A**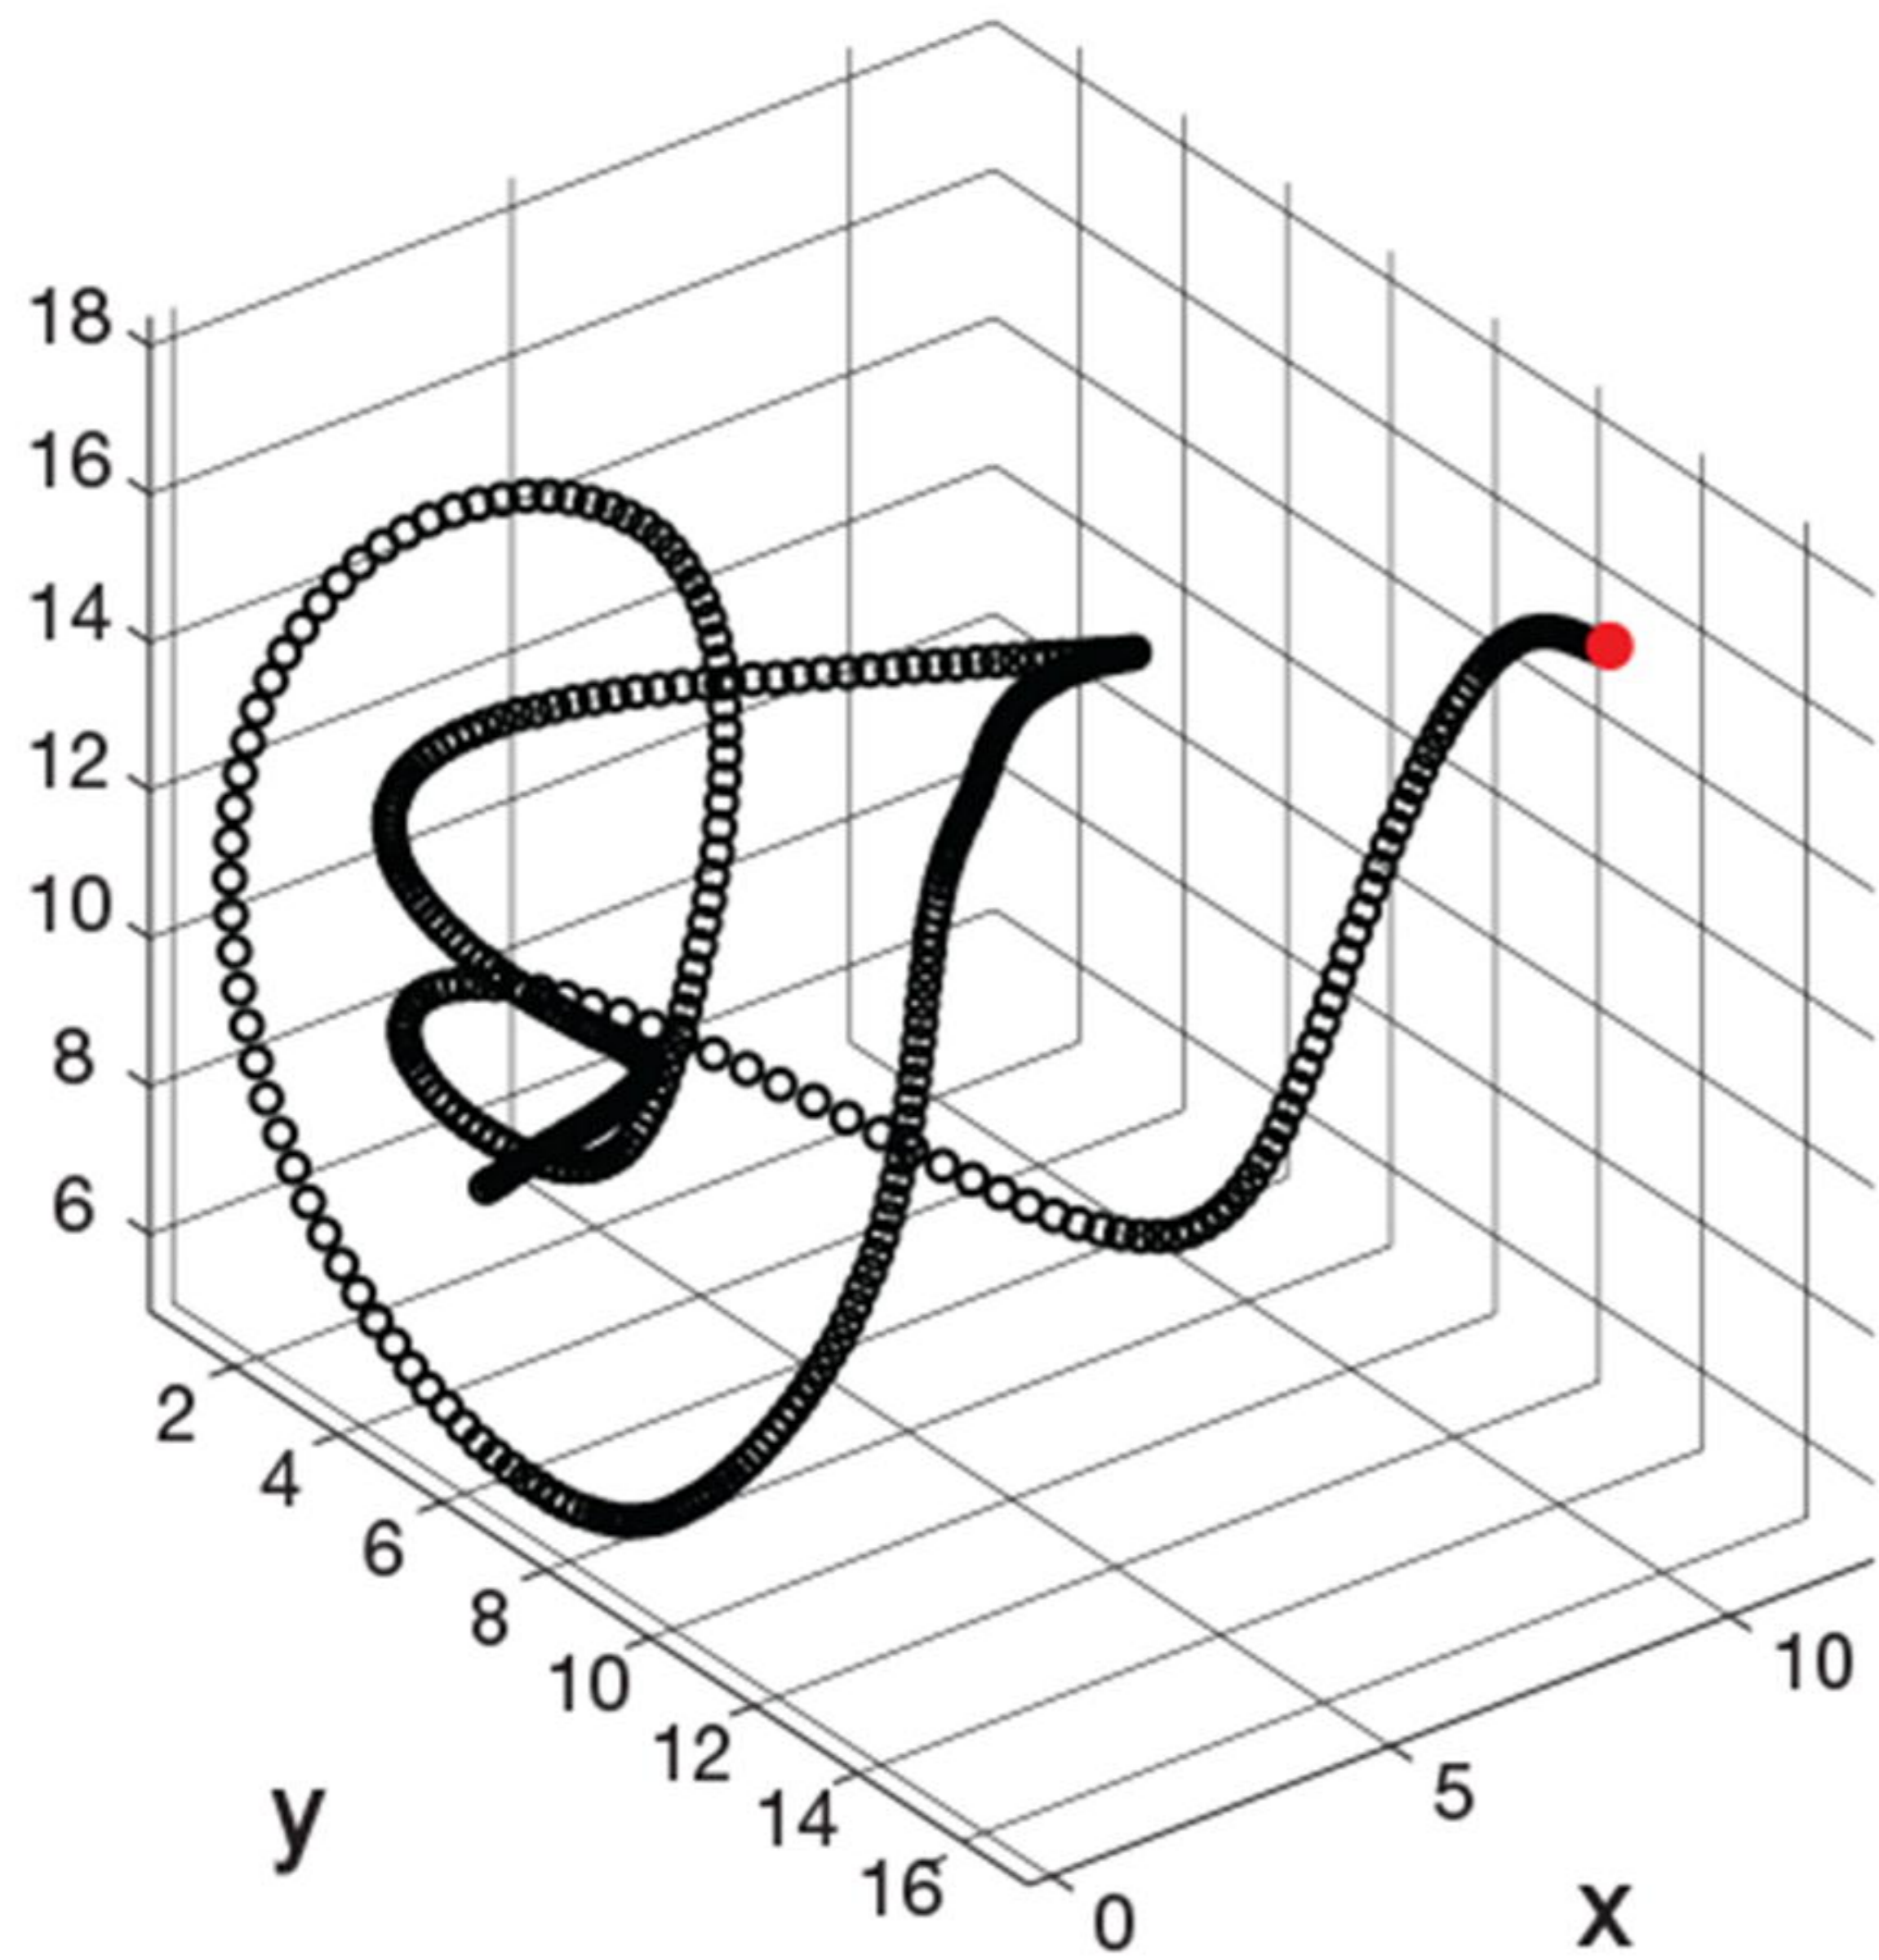**B**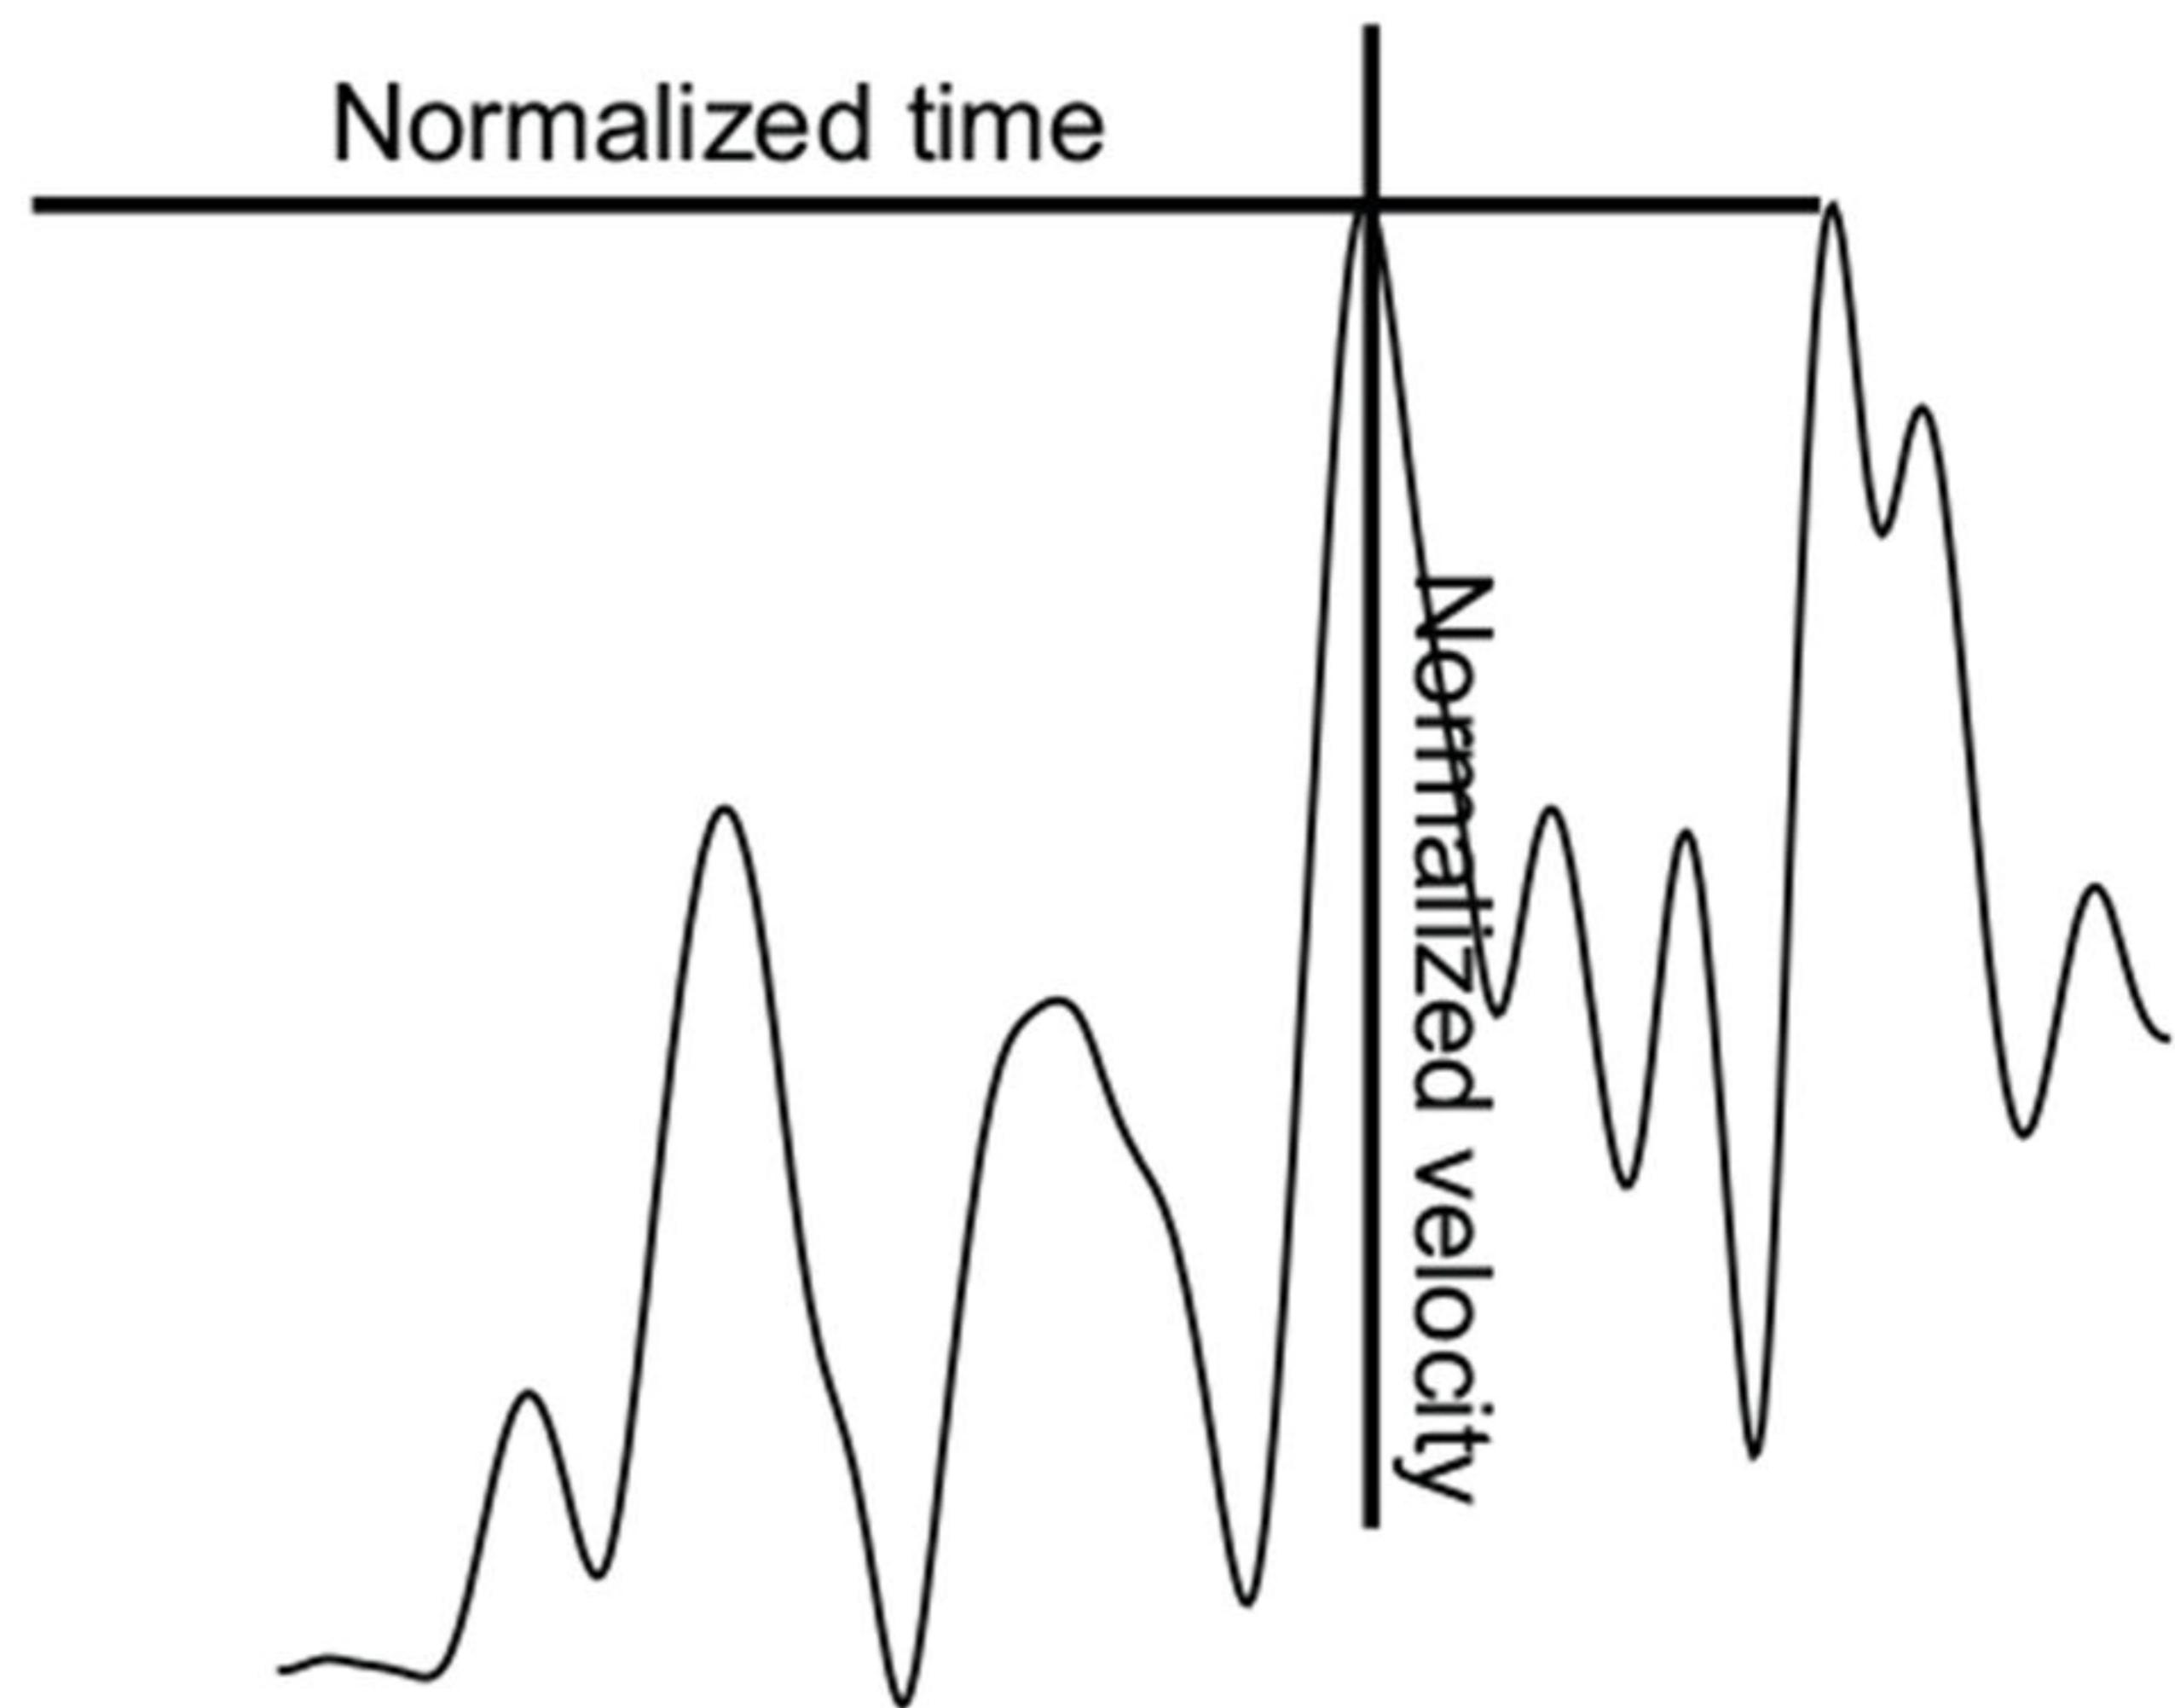

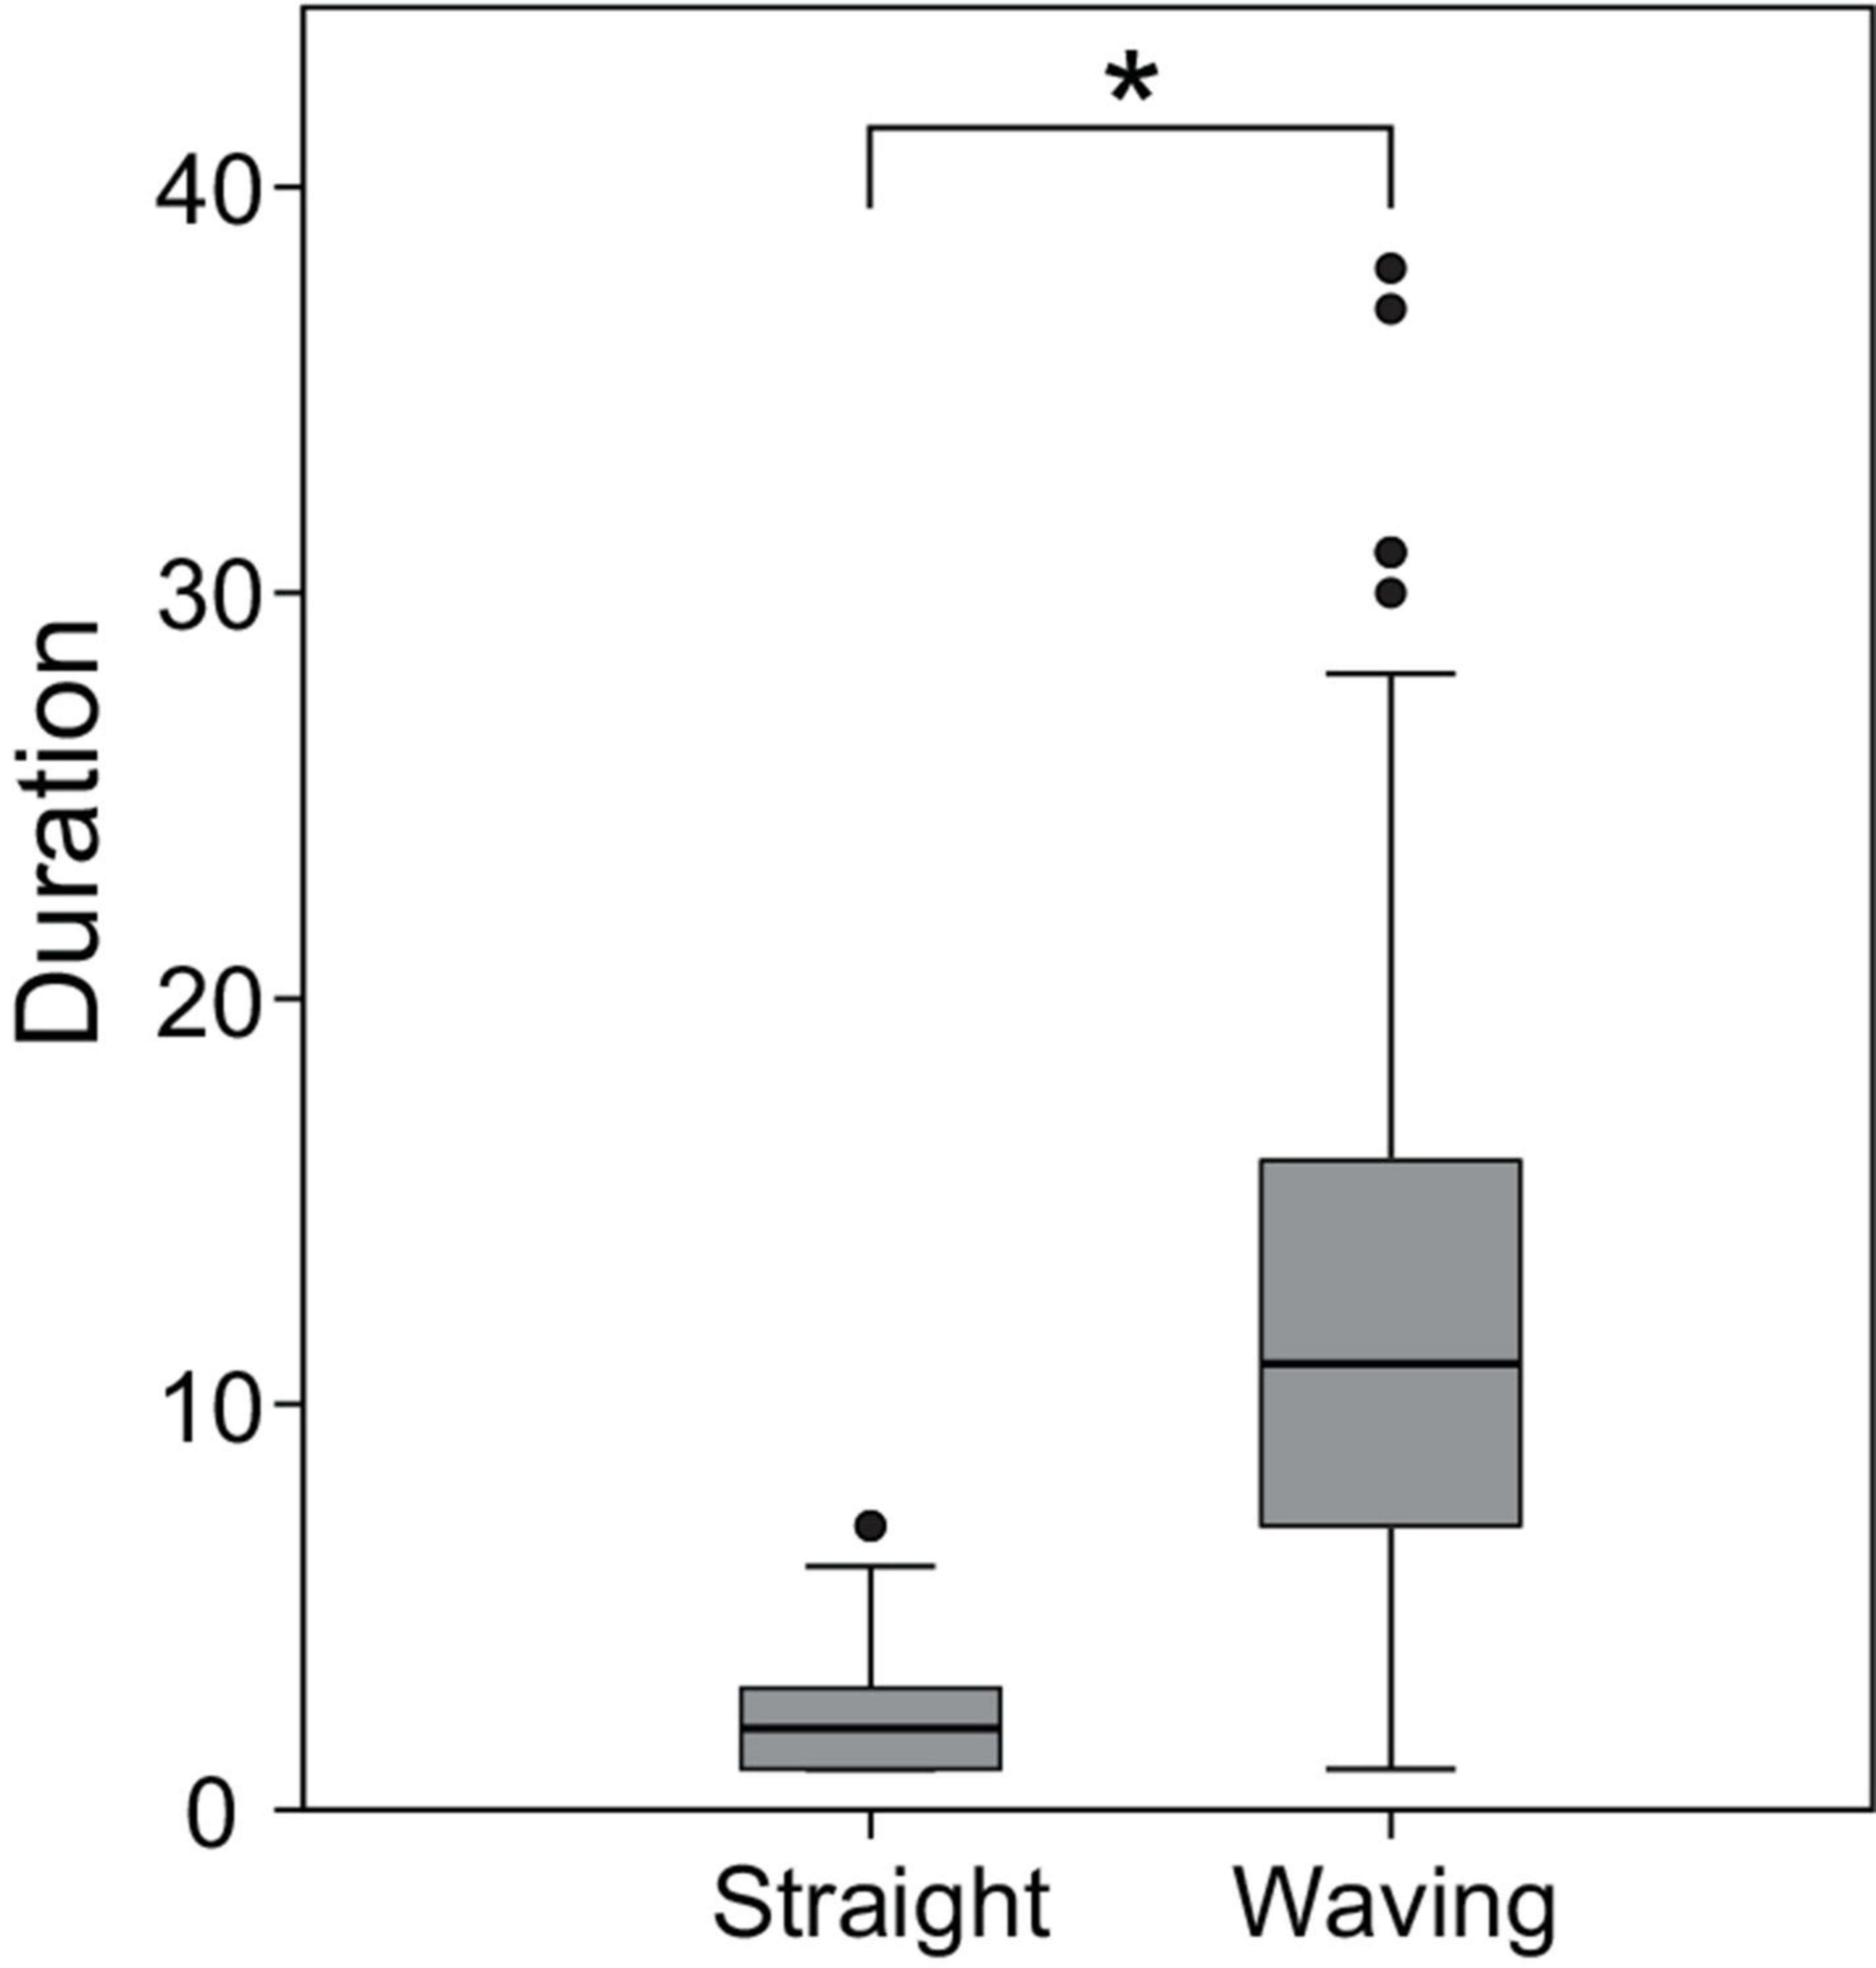



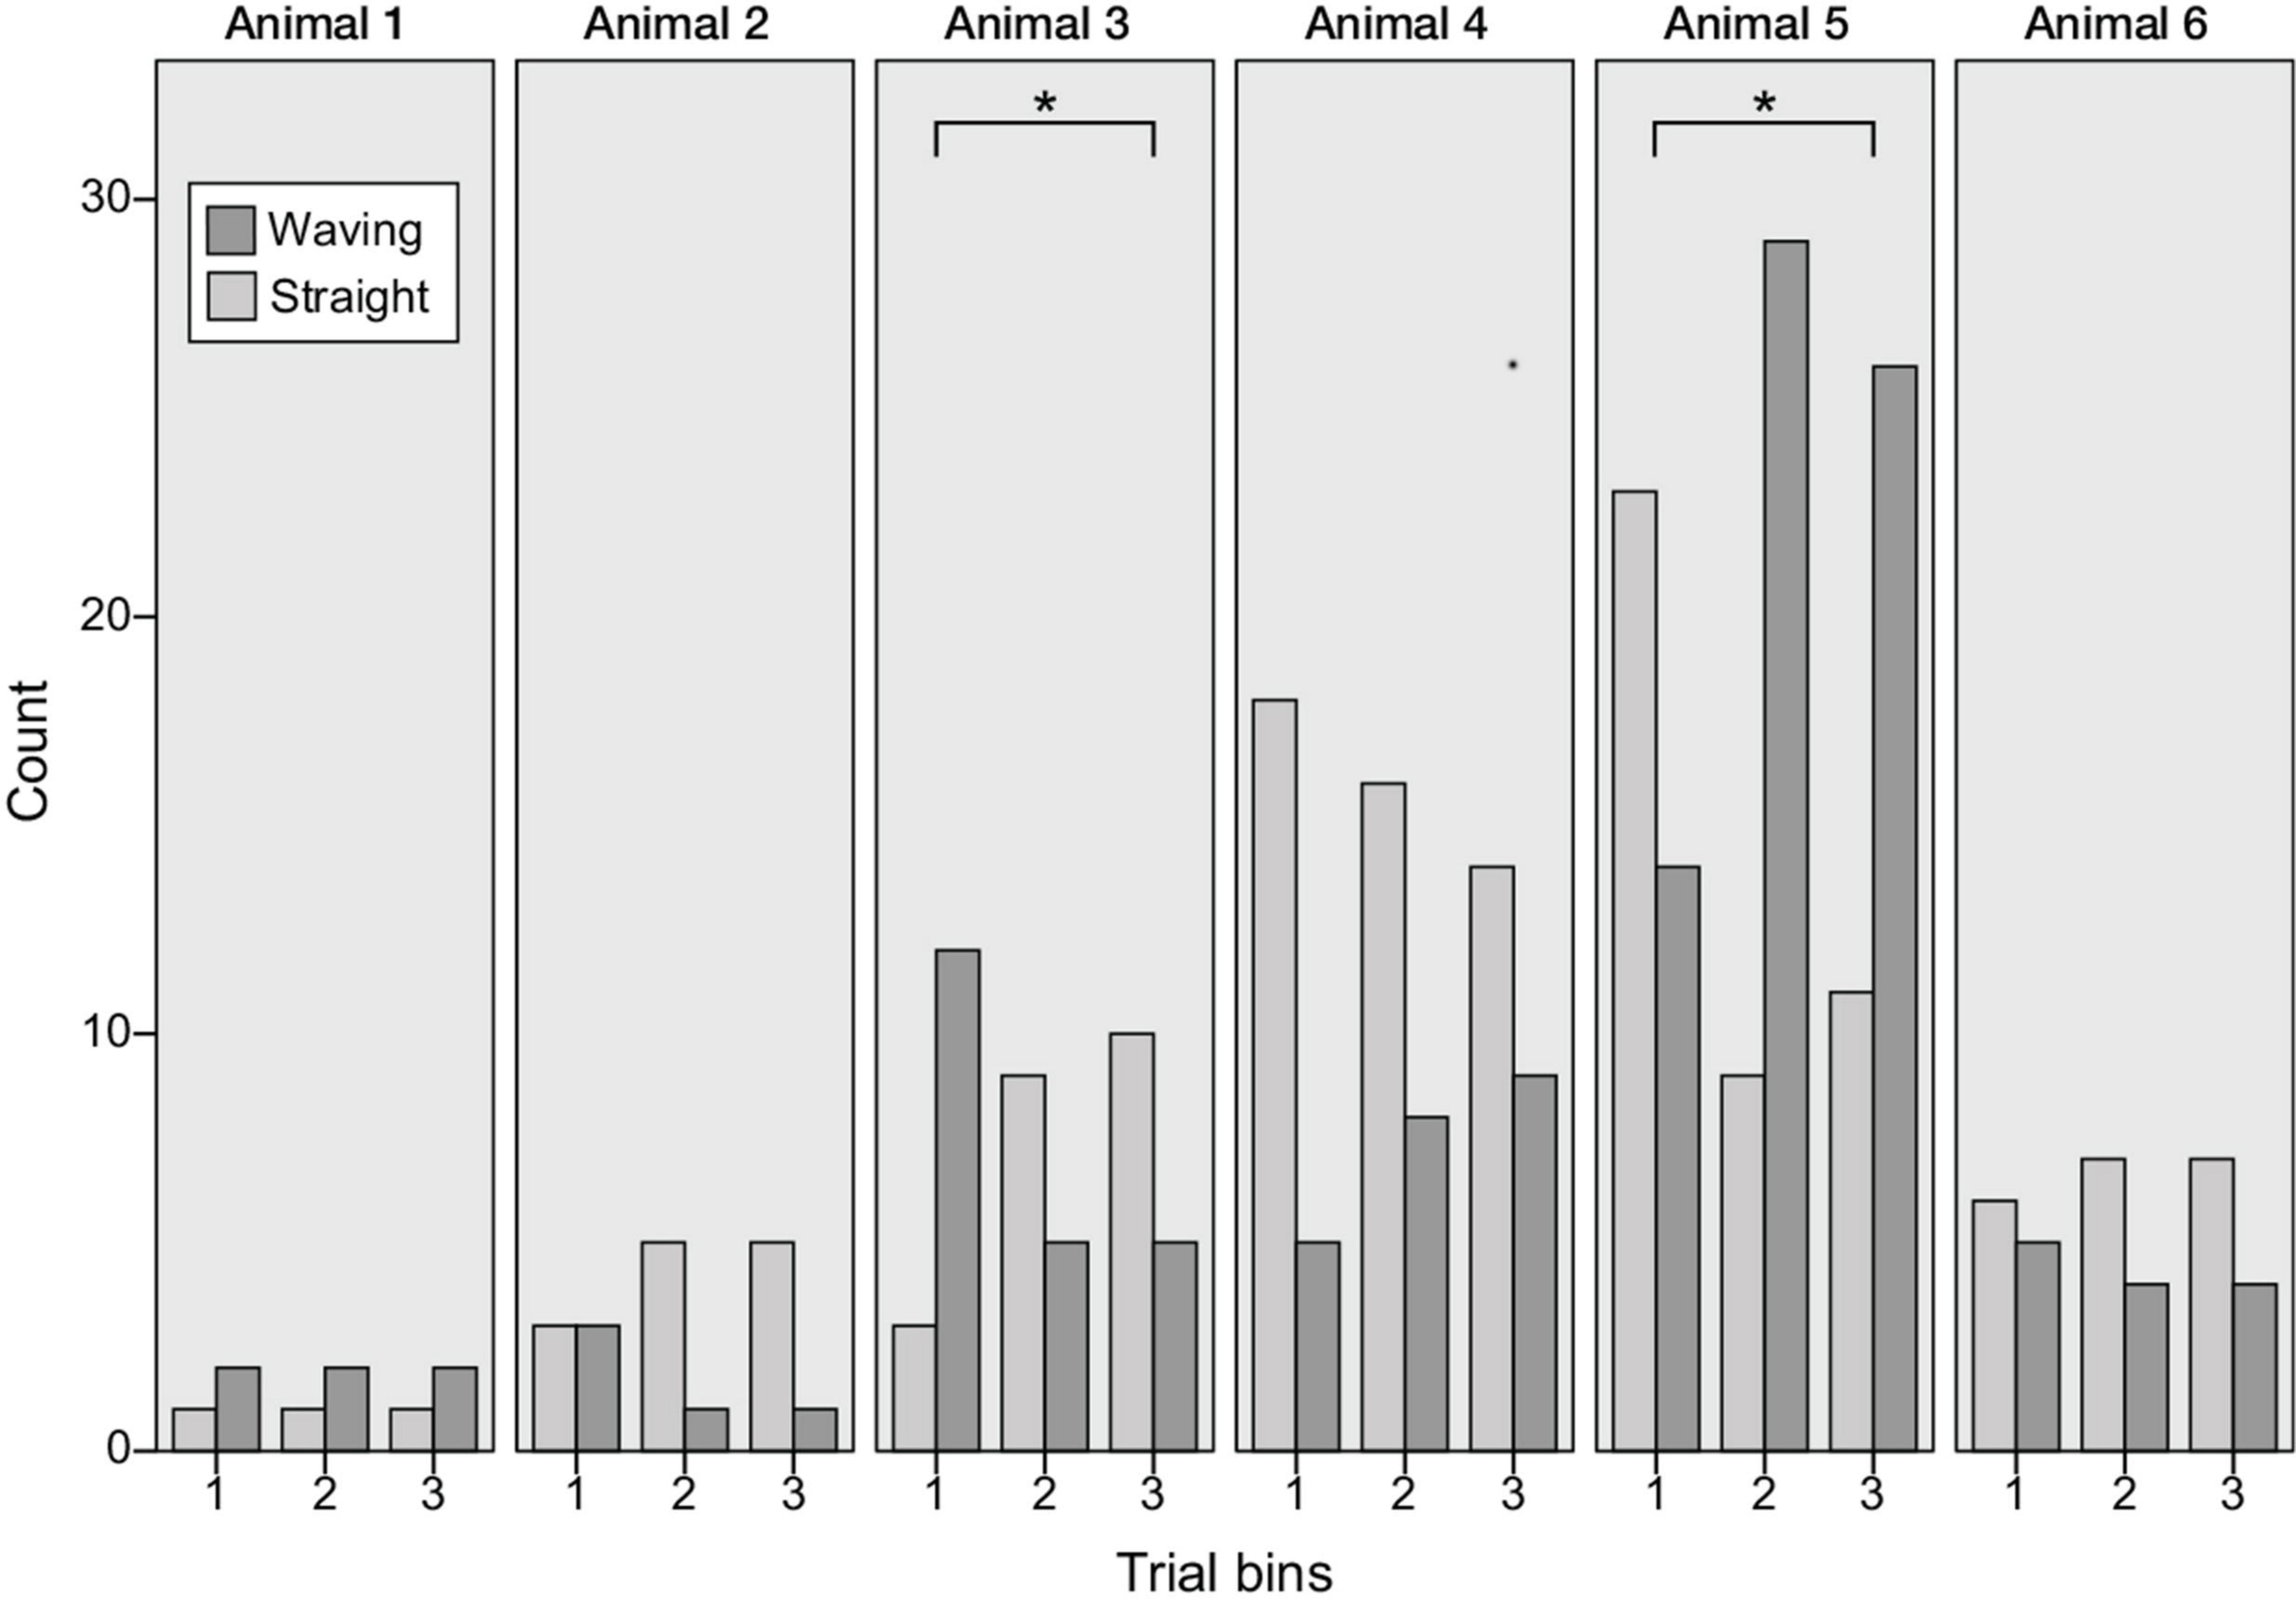

## Straight category fetchings

**A**

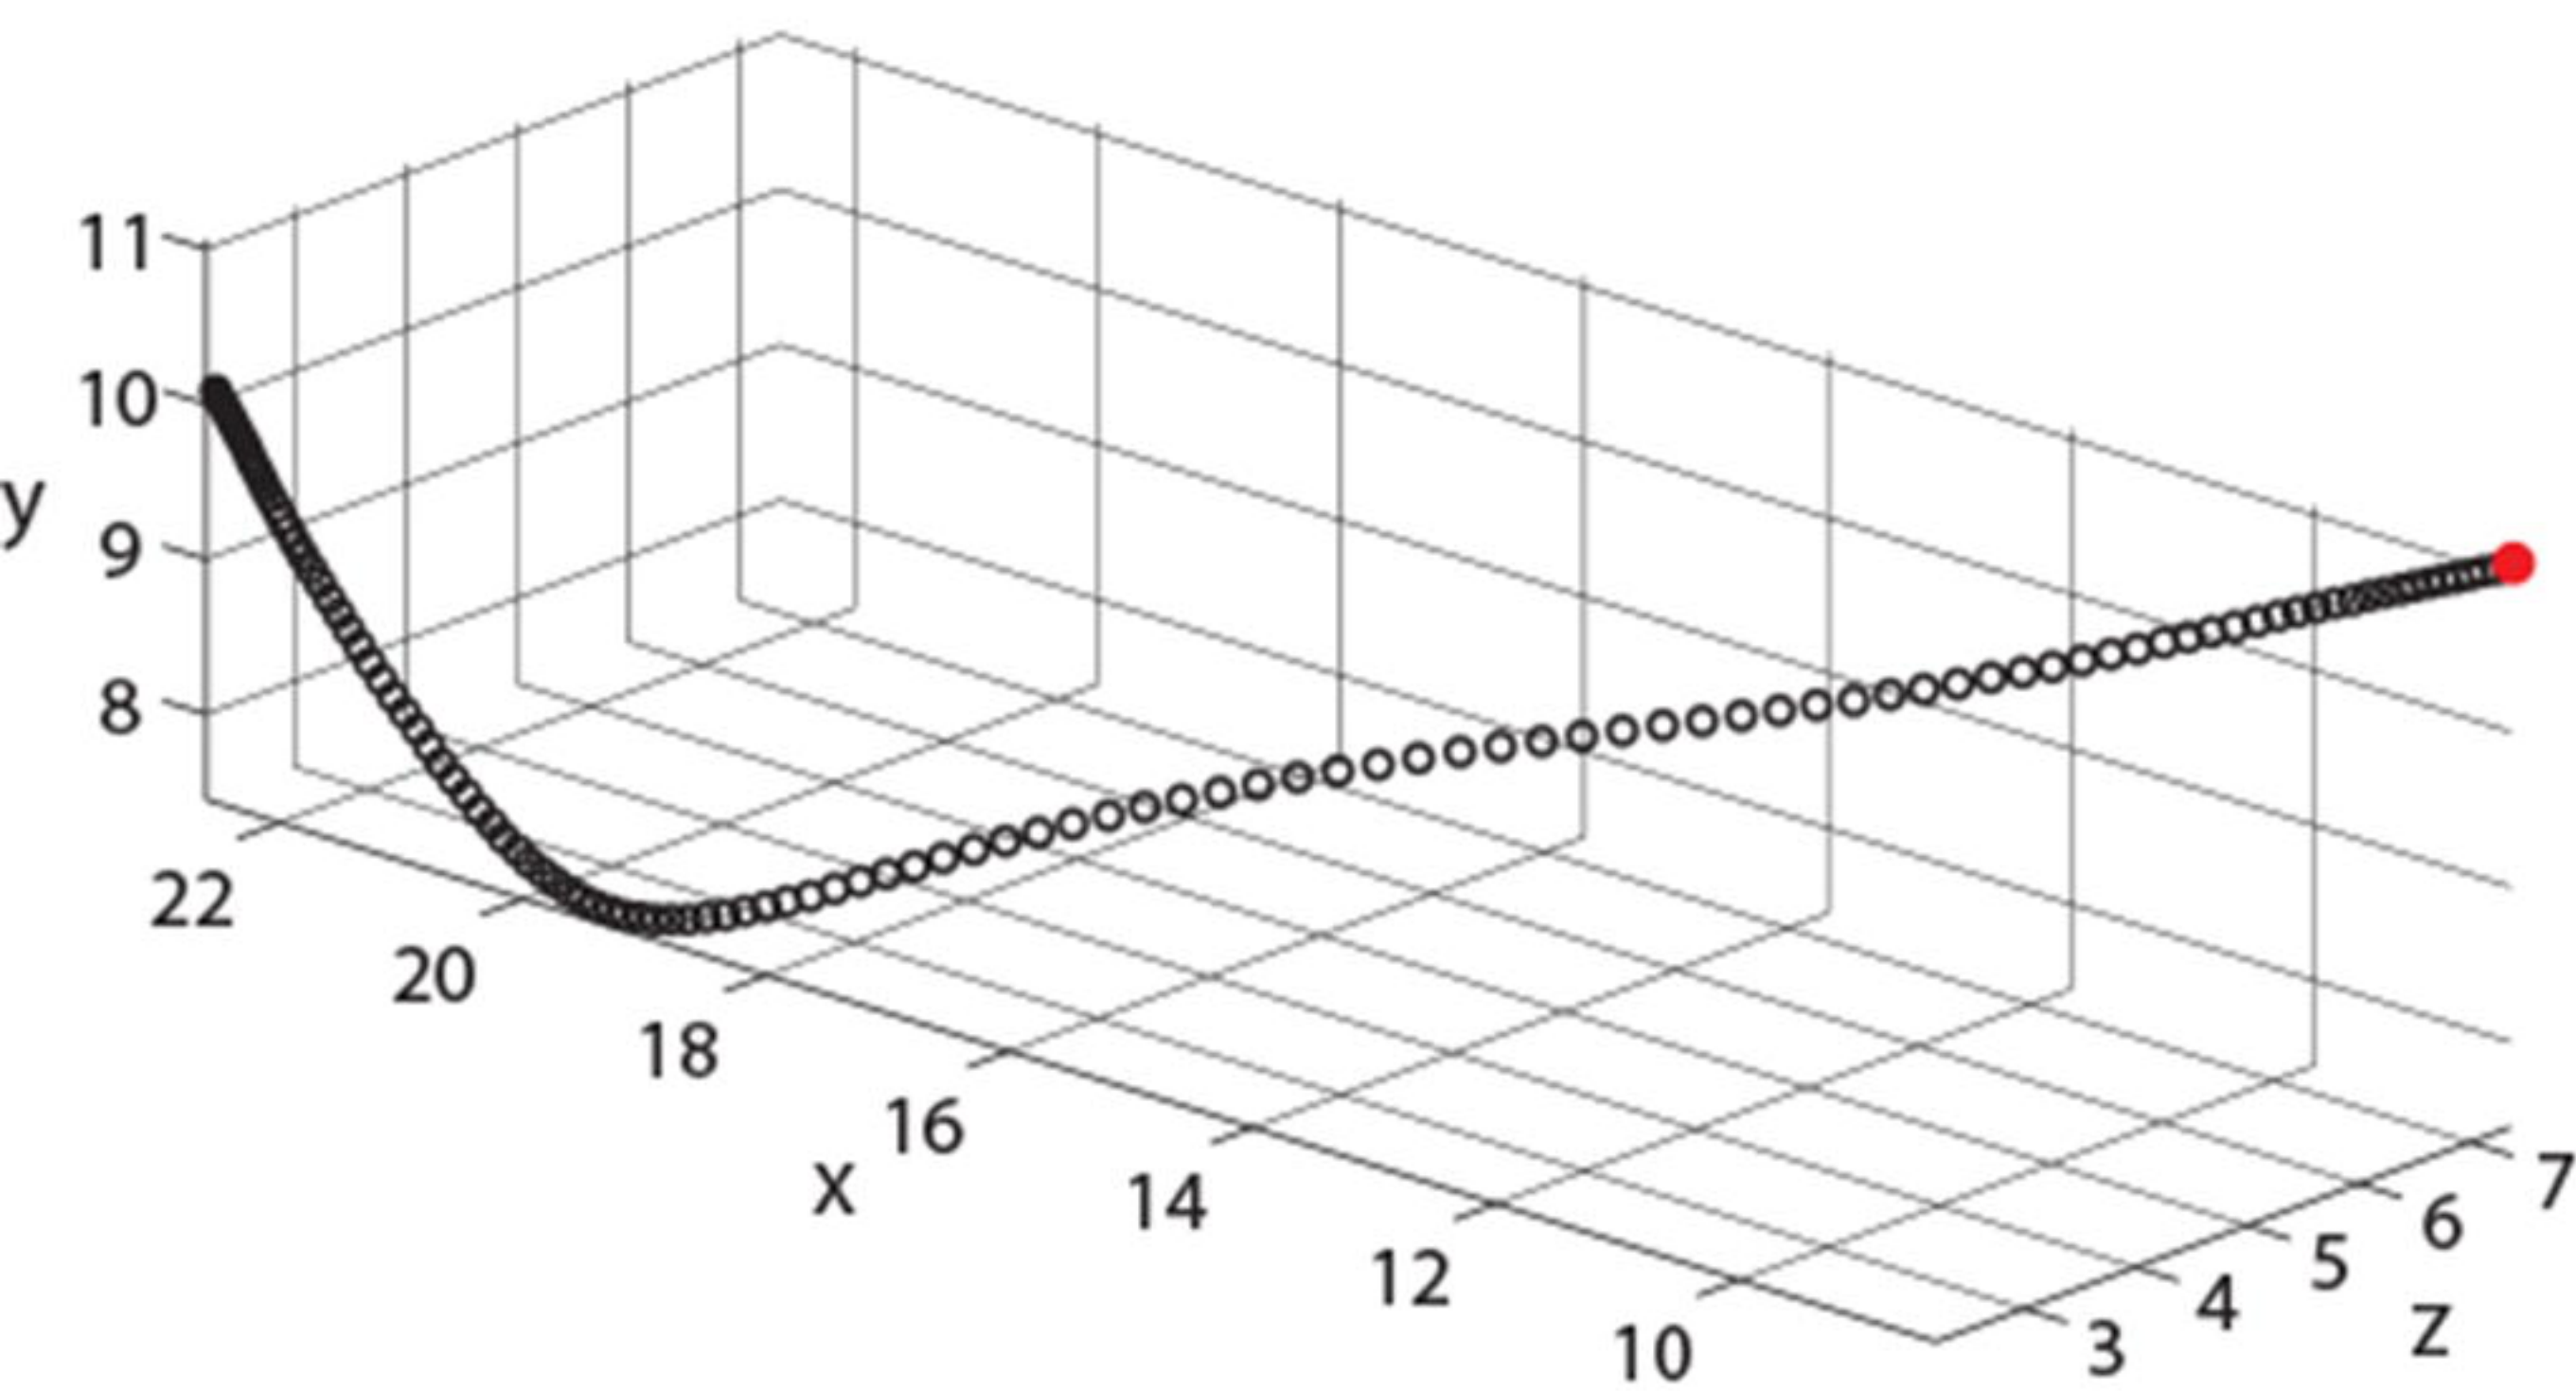

**B**

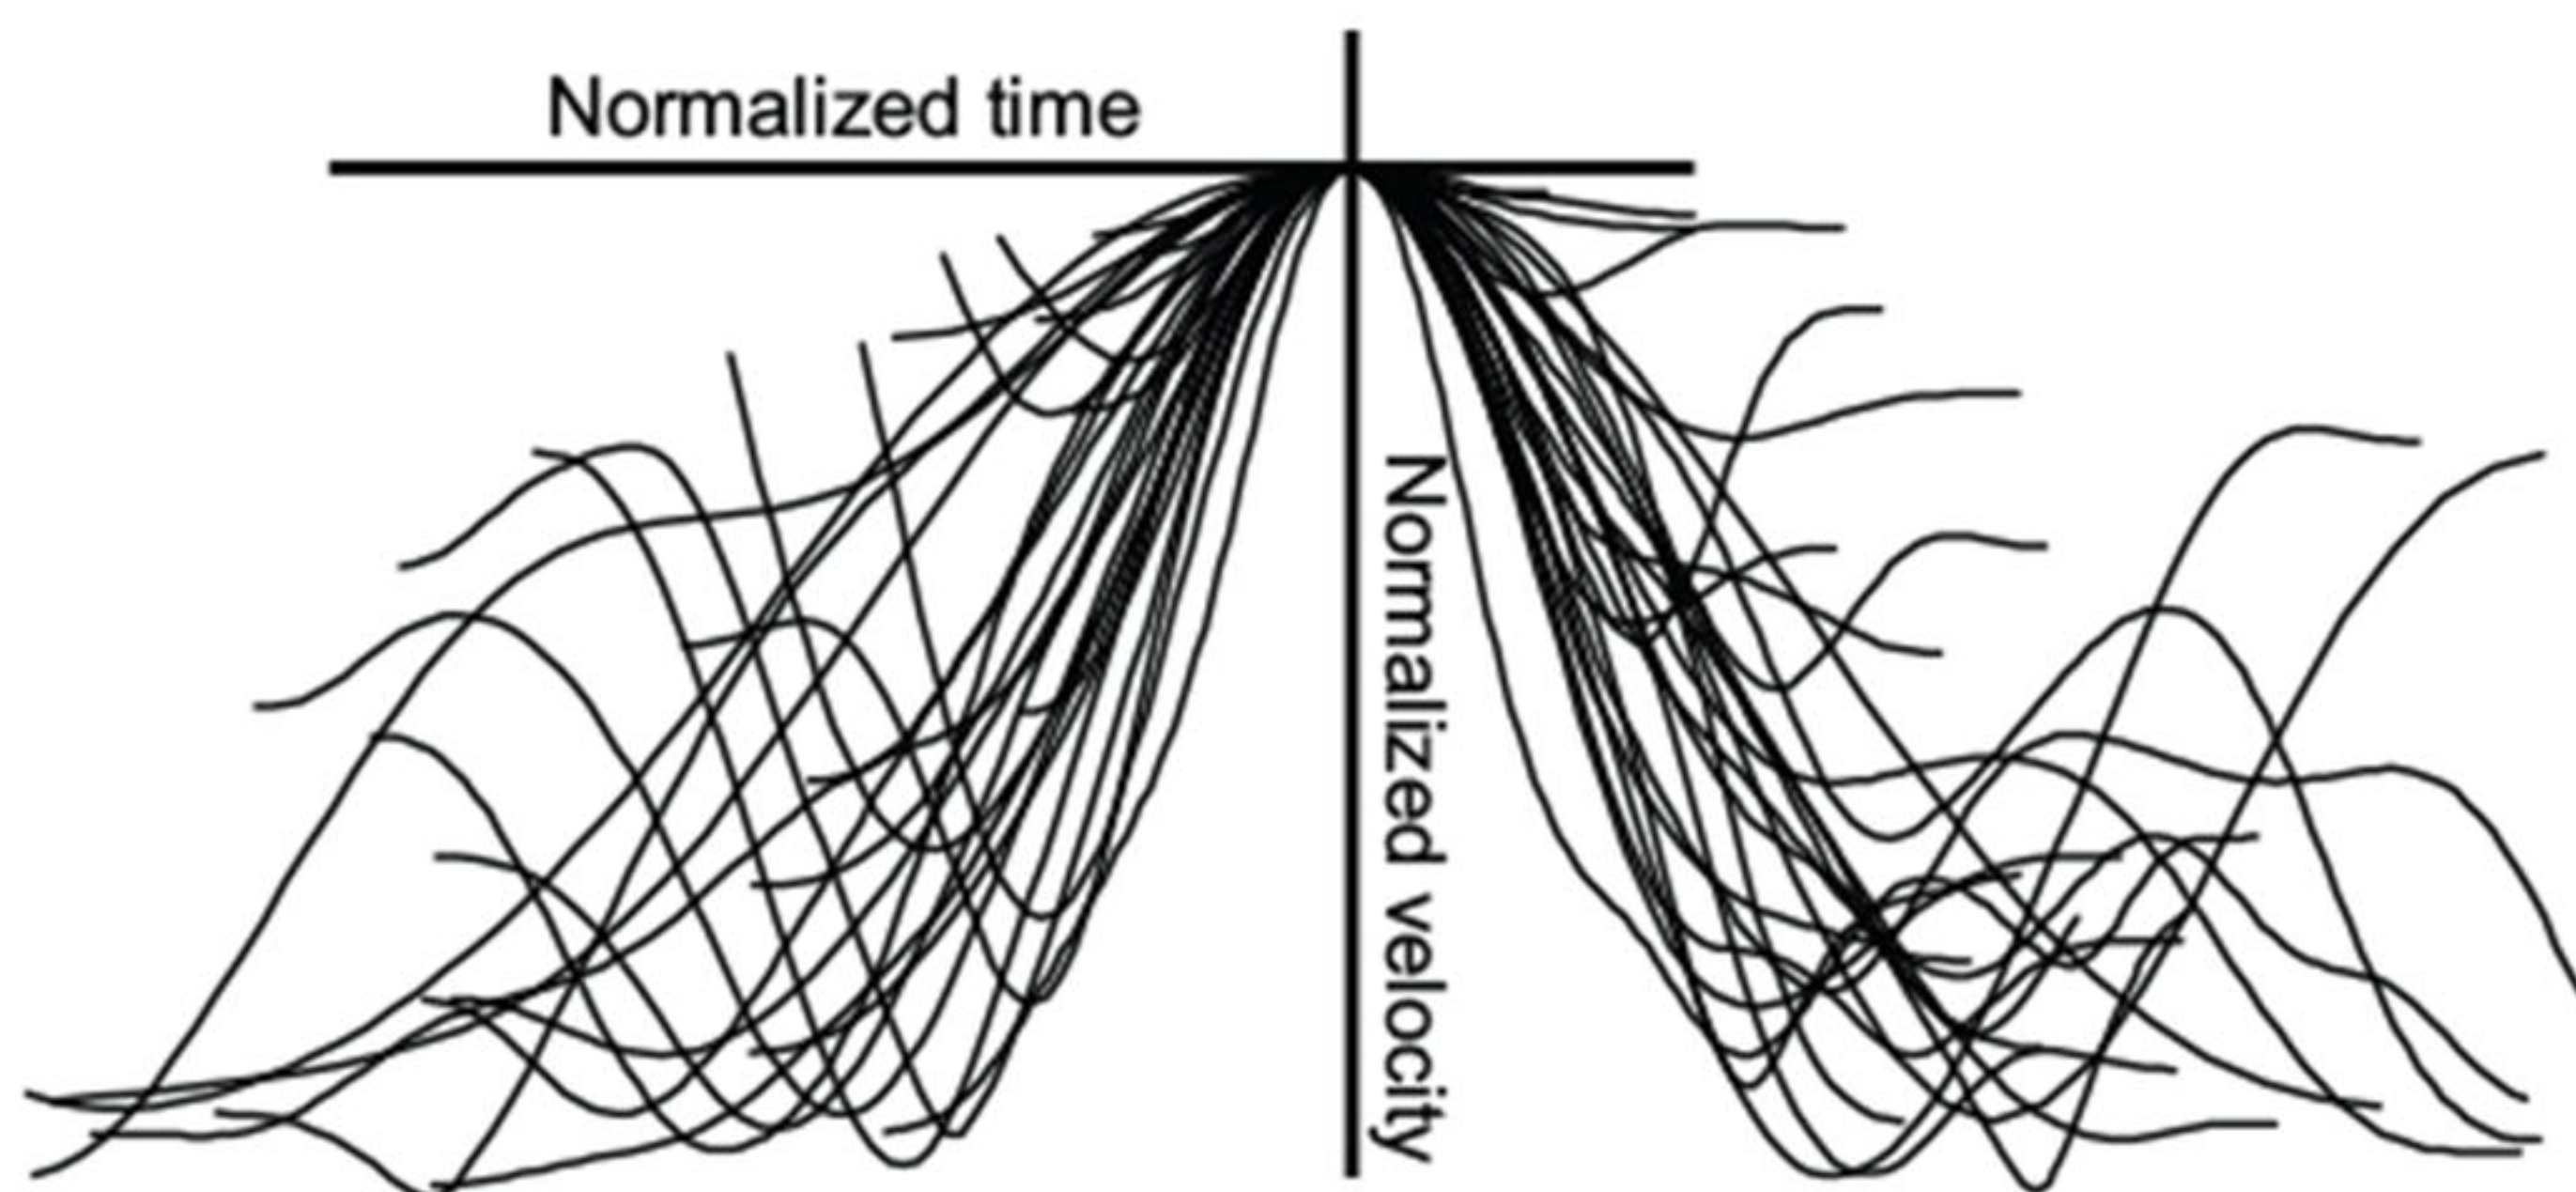

## Deflected category fetchings

**C**

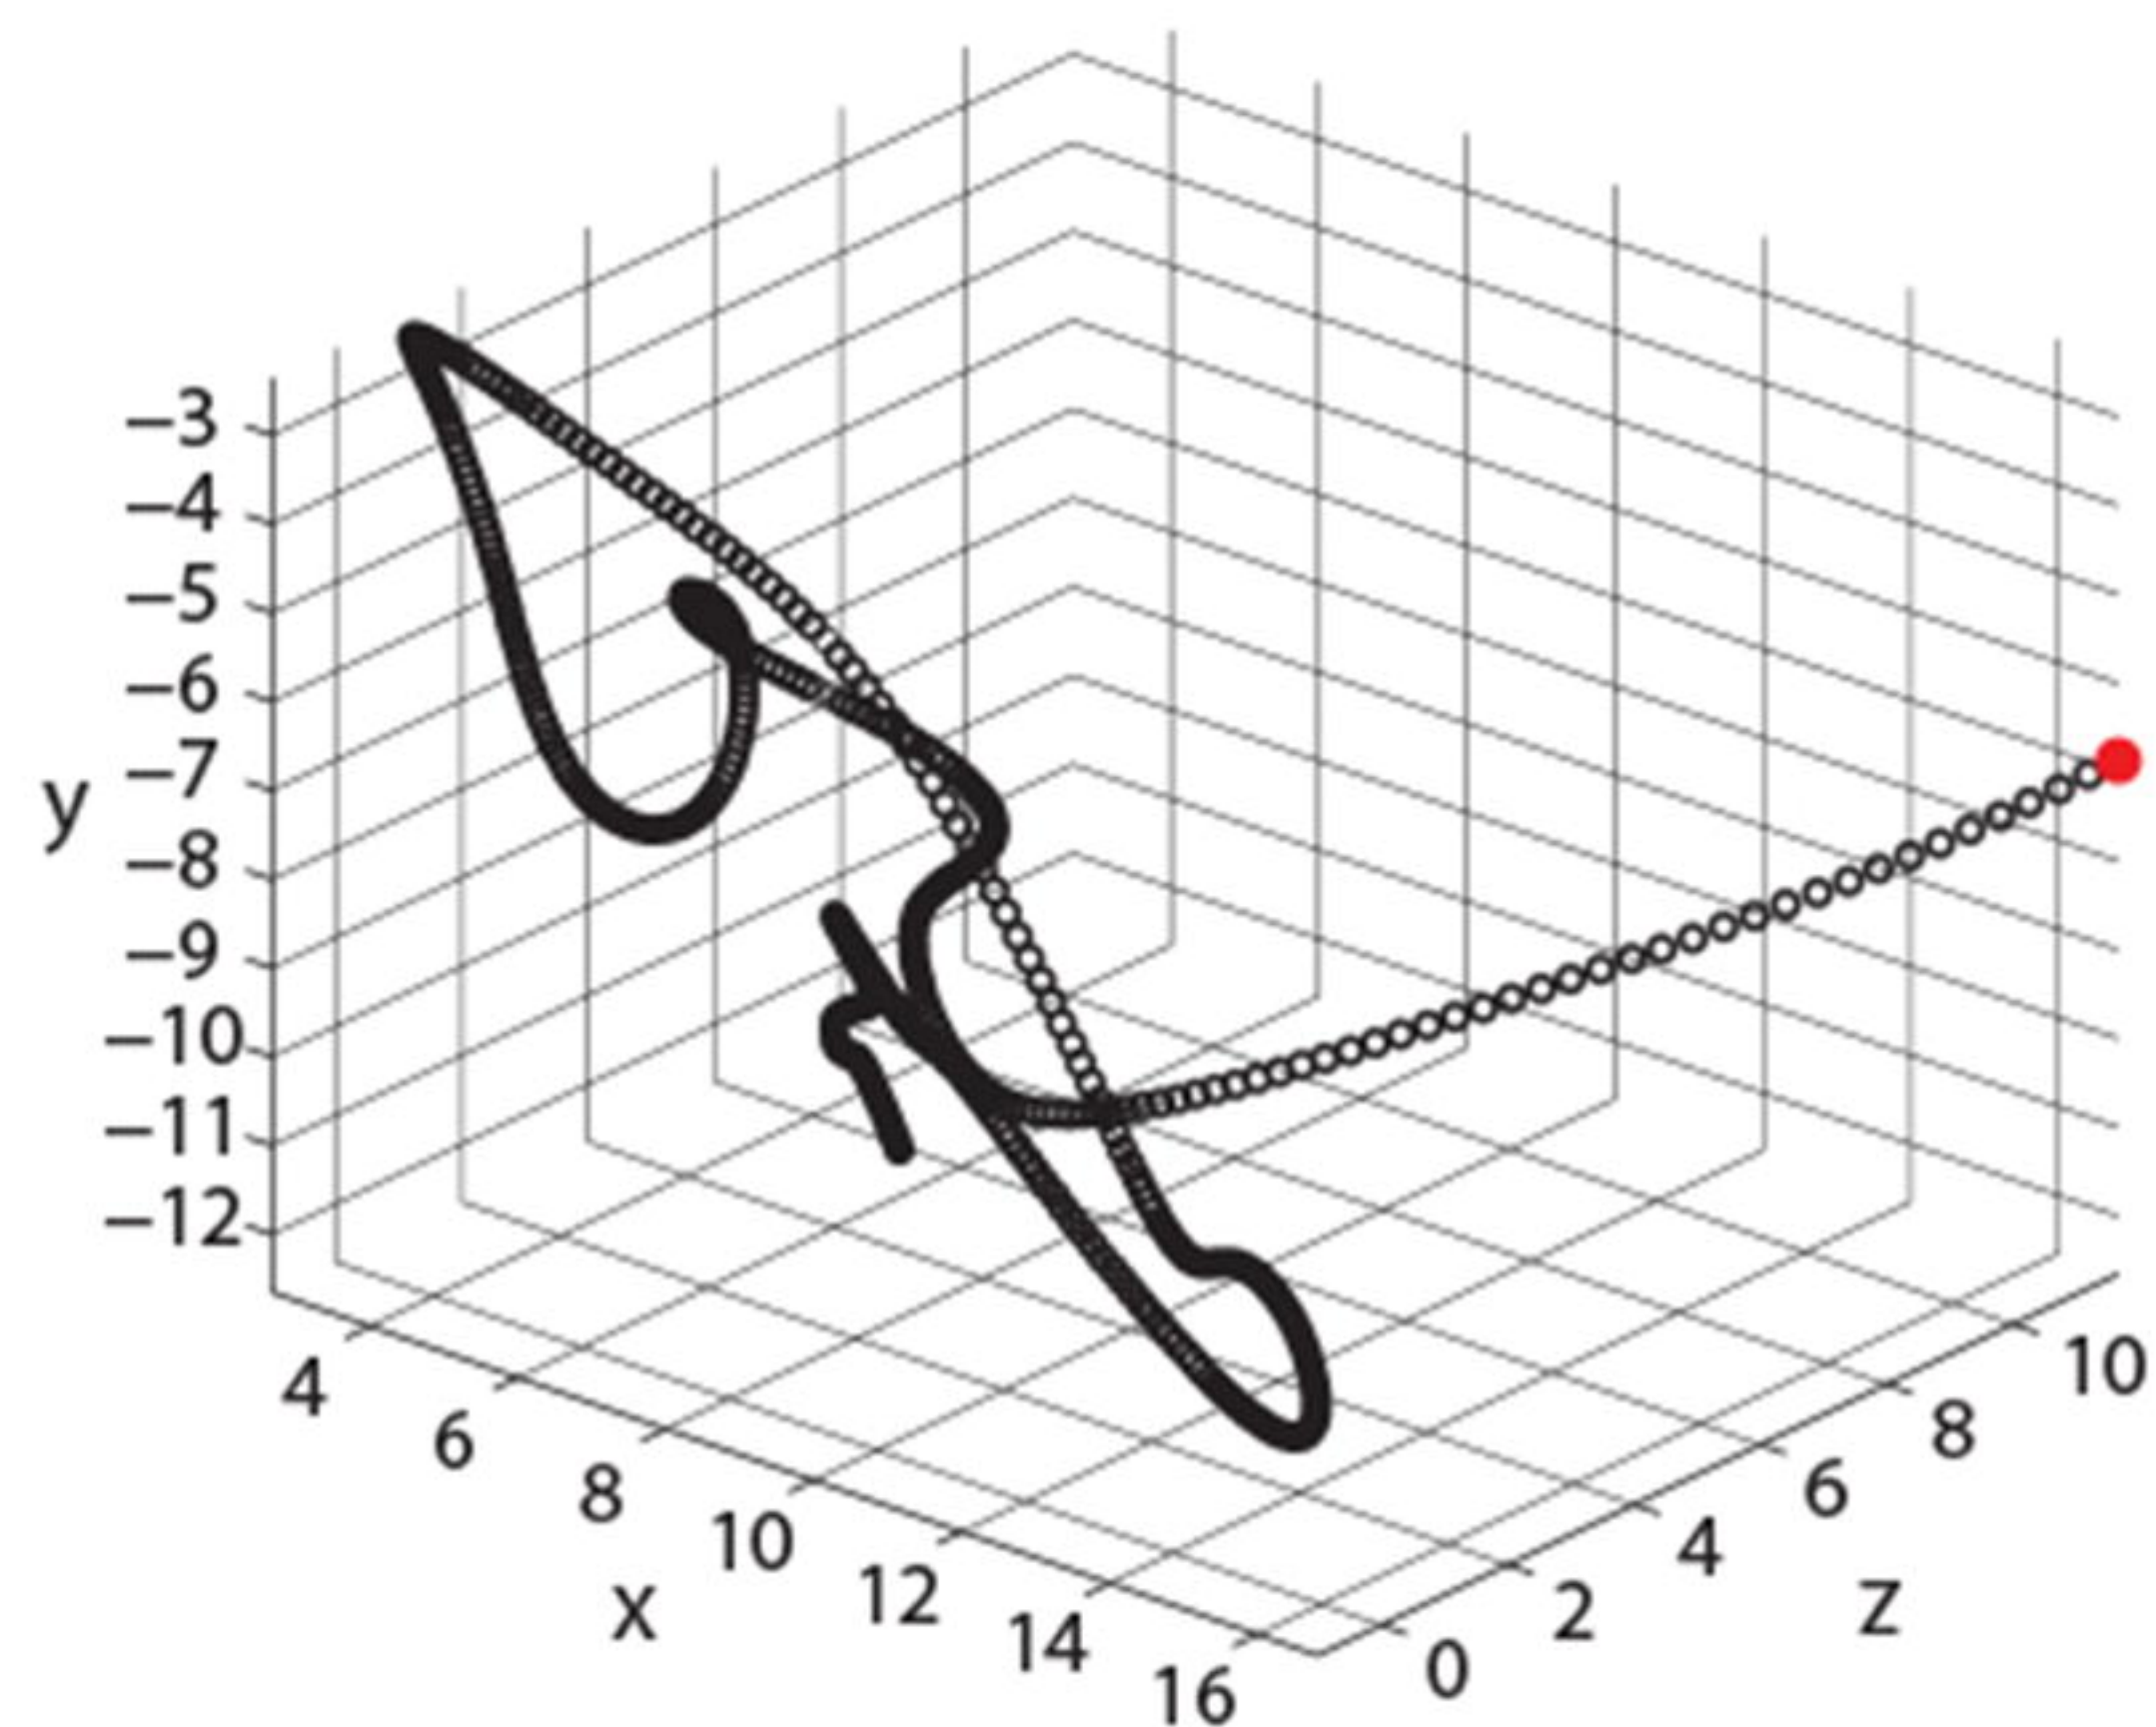

**D**

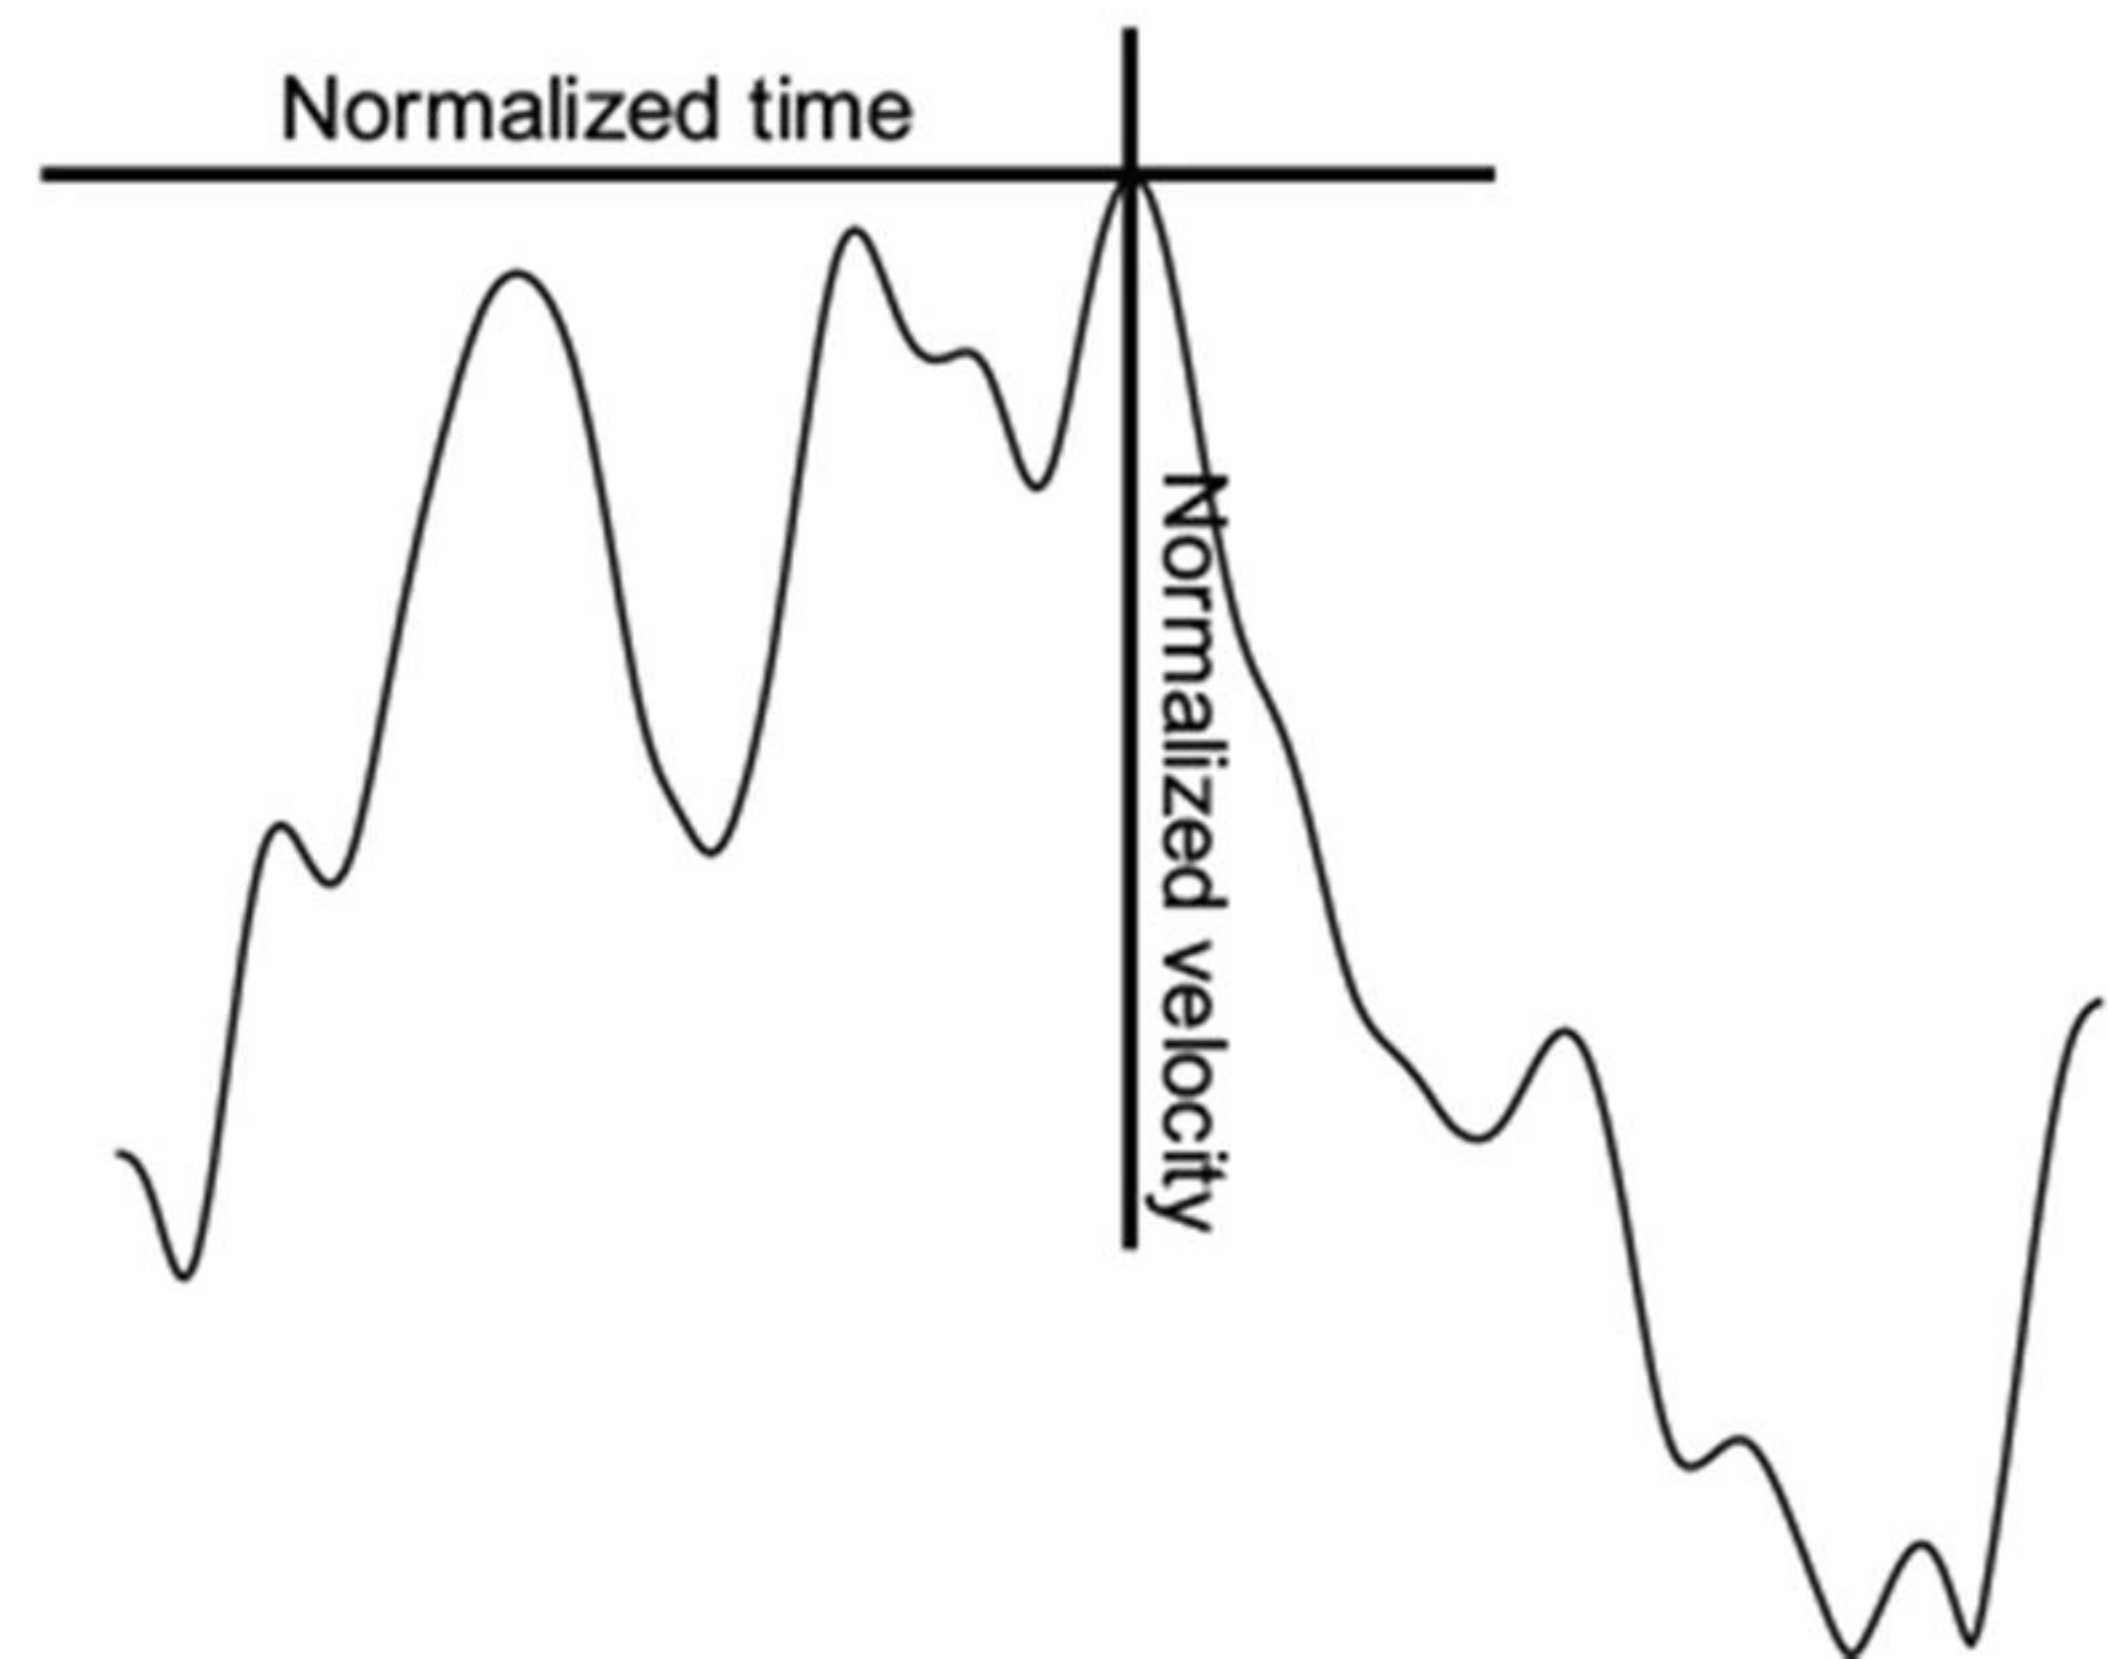

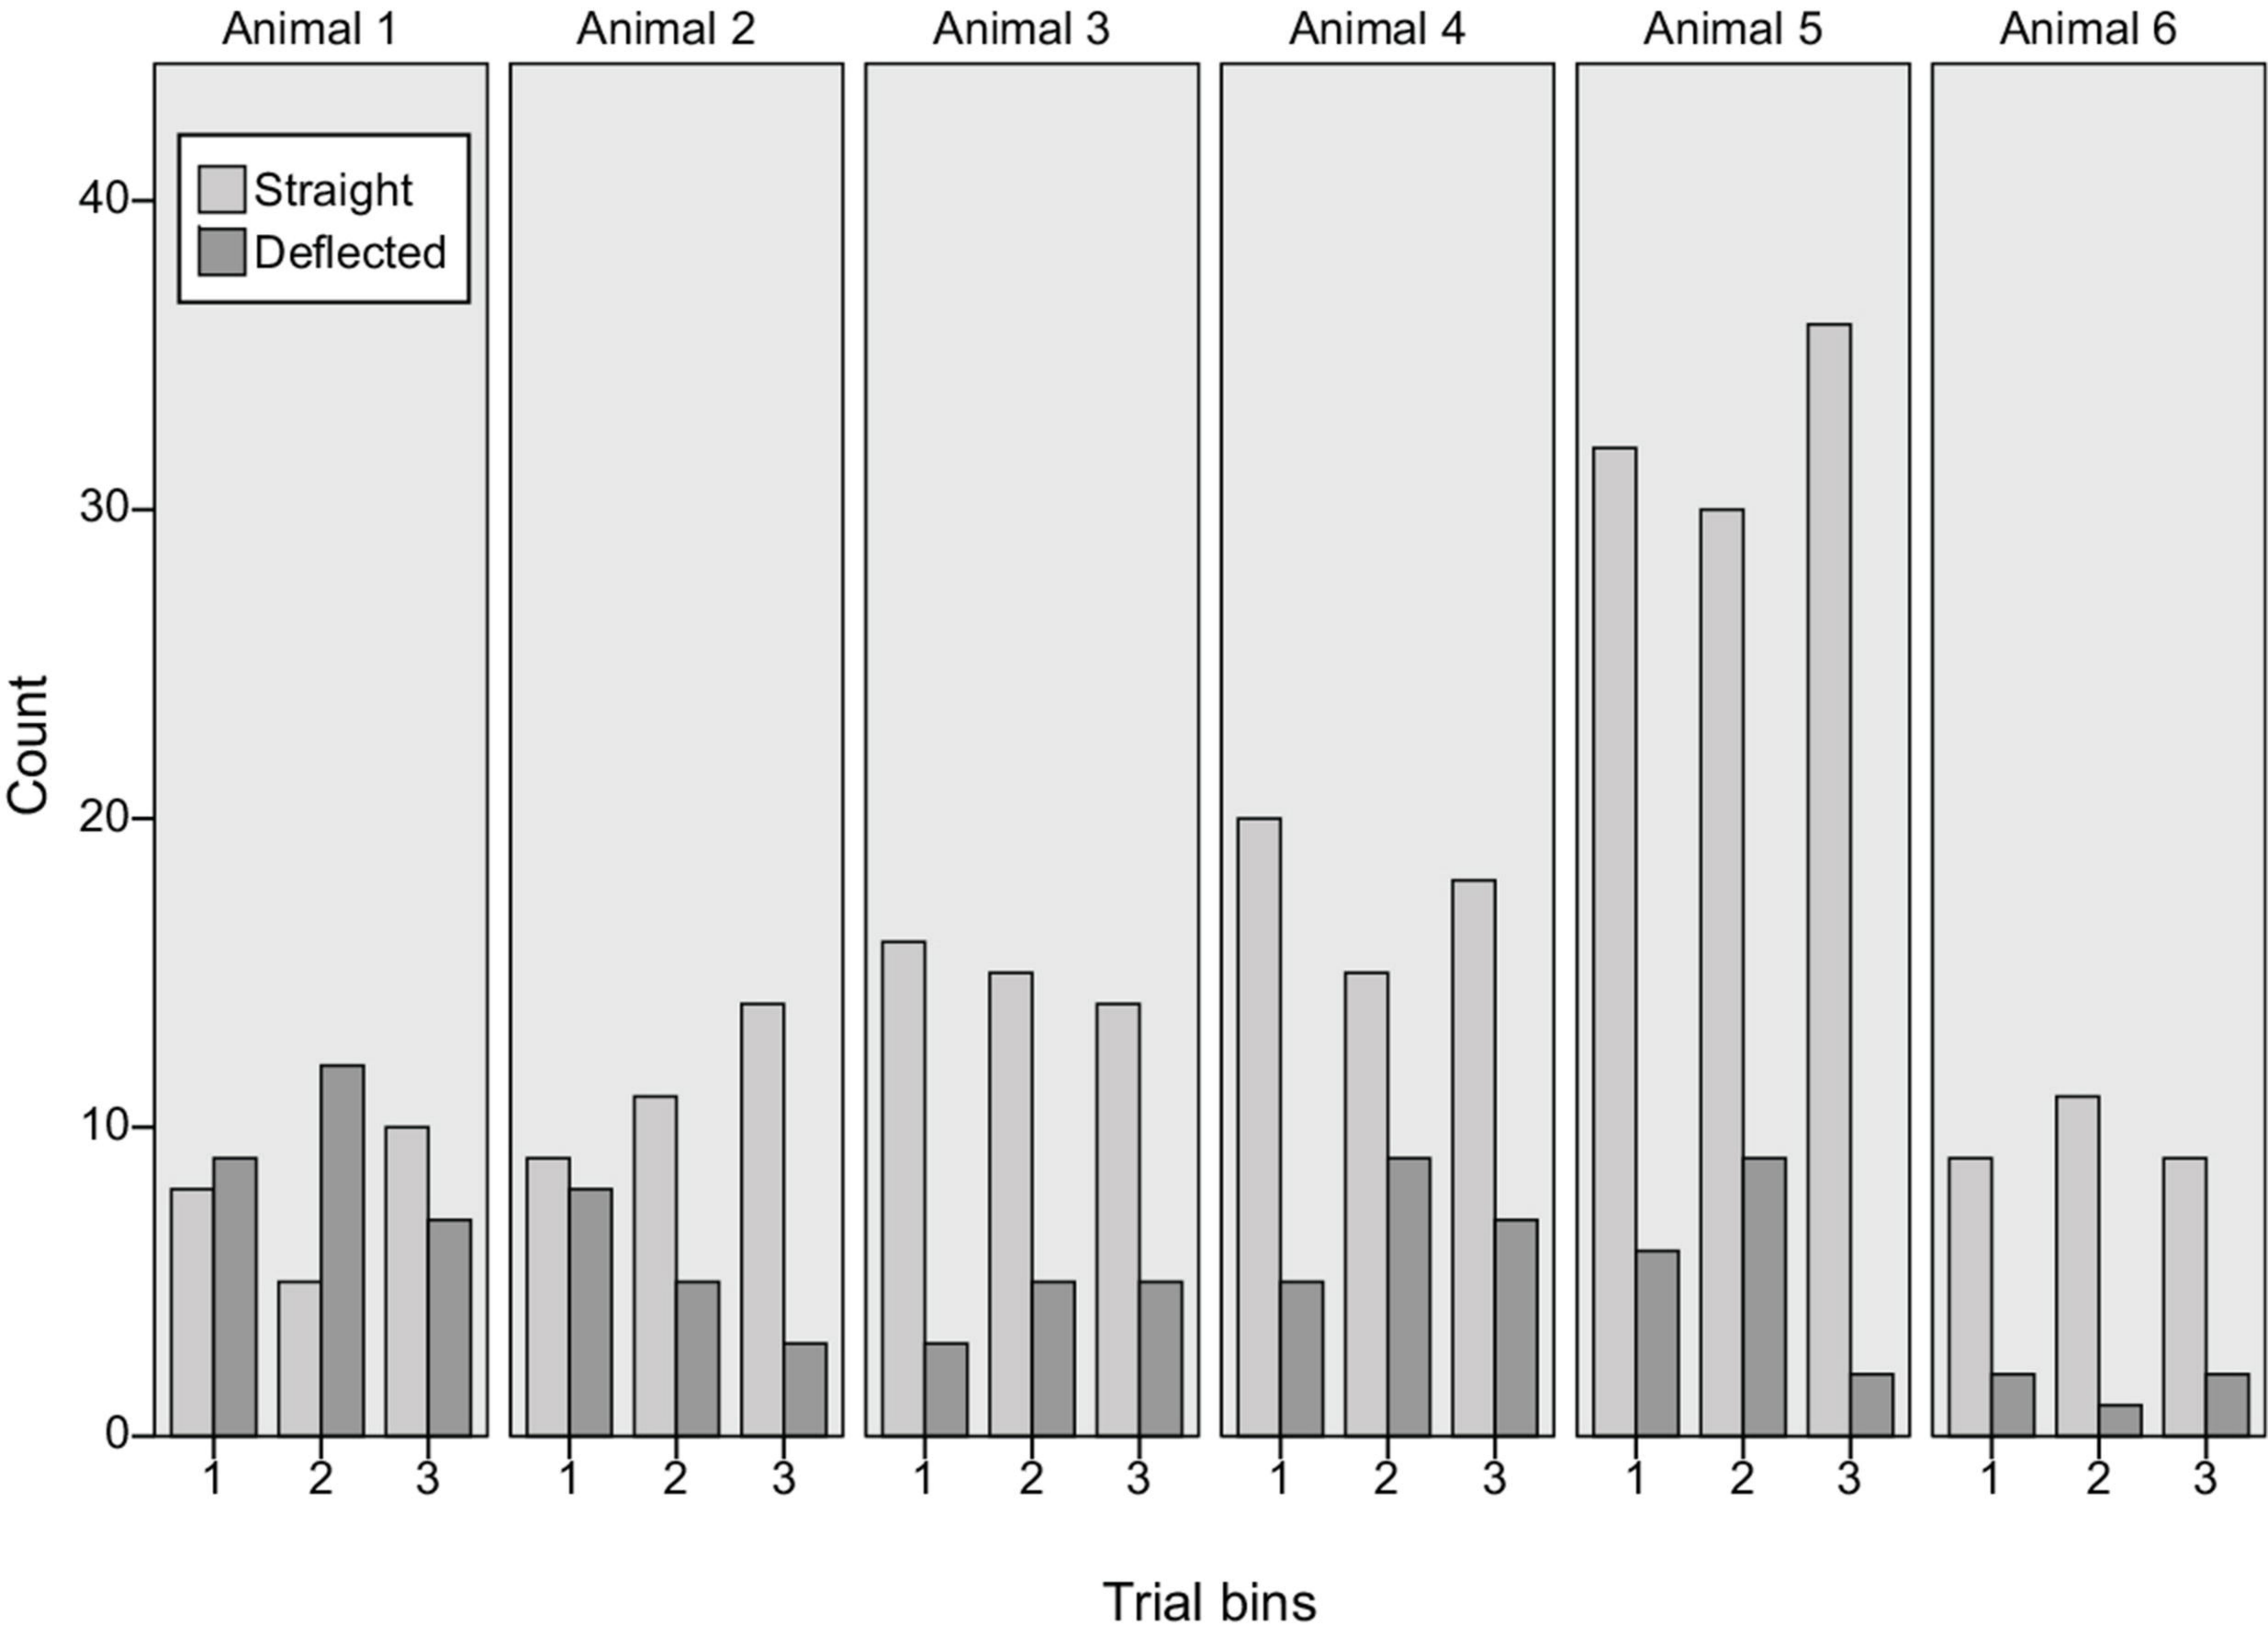

Source: https://cob.silverchair.com/jeb/article-pdf/doi/10.1242/jeb.115915/2033050/jeb_115915.pdf
